# Supplementary material for: Increased waist circumference and prevalence of type 2 diabetes and hypertension in Chinese adults: two population-based cross-sectional surveys in Shanghai, China
Source: PubMed Central journal article supplement — BMJ Open. 2013 Oct 28;3(10):e003408. doi: 10.1136/bmjopen-2013-003408 (PMC3816232; doi:10.1136/bmjopen-2013-003408), 2013-10-28
Supplement: bmjopen-2013-003408.draft_revisions.pdf [file bmjopen-2013-003408.draft_revisions.pdf]

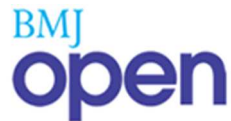

**Increased Waist Circumference and Prevalence of Type 2  
Diabetes and Hypertension in Chinese Adults: Two  
Population-based Cross-sectional Surveys in Shanghai,  
China**

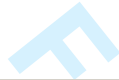

|                                 |                                                                                                                                                                                                                                                                                                                                                                                                                                                                                                                                                                                                                                                                                                                                                                                                                                                                                                                                                                    |
|---------------------------------|--------------------------------------------------------------------------------------------------------------------------------------------------------------------------------------------------------------------------------------------------------------------------------------------------------------------------------------------------------------------------------------------------------------------------------------------------------------------------------------------------------------------------------------------------------------------------------------------------------------------------------------------------------------------------------------------------------------------------------------------------------------------------------------------------------------------------------------------------------------------------------------------------------------------------------------------------------------------|
| Journal:                        | <i>BMJ Open</i>                                                                                                                                                                                                                                                                                                                                                                                                                                                                                                                                                                                                                                                                                                                                                                                                                                                                                                                                                    |
| Manuscript ID:                  | bmjopen-2013-003408                                                                                                                                                                                                                                                                                                                                                                                                                                                                                                                                                                                                                                                                                                                                                                                                                                                                                                                                                |
| Article Type:                   | Research                                                                                                                                                                                                                                                                                                                                                                                                                                                                                                                                                                                                                                                                                                                                                                                                                                                                                                                                                           |
| Date Submitted by the Author:   | 24-Jun-2013                                                                                                                                                                                                                                                                                                                                                                                                                                                                                                                                                                                                                                                                                                                                                                                                                                                                                                                                                        |
| Complete List of Authors:       | Ruan, Ye; Shanghai Municipal Center for Disease Control and Prevention, Department of Diabetes Prevention and Control<br>Mo, Miao; School of Public Health, Fudan University, Department of Epidemiology<br>Joss-Moore, Lisa; University of Utah, Division of Neonatology<br>Li, Yan Yun; Shanghai Municipal Center for Disease Control and Prevention, Department of Diabetes Prevention and Control<br>Yang, Qun Di; Shanghai Municipal Center for Disease Control and Prevention, Department of Diabetes Prevention and Control<br>Shi, Liang; Shanghai Municipal Center for Disease Control and Prevention, Department of Diabetes Prevention and Control<br>Zhang, Hua; School of Public Health, Fudan University, Department of Epidemiology<br>Li, Rui; Shanghai Municipal Center for Disease Control and Prevention, Department of Diabetes Prevention and Control<br>Xu, Wang Hong; Fudan University, Department of Epidemiology, School of Public Health |
| <b>Primary Subject Heading</b>: | Epidemiology                                                                                                                                                                                                                                                                                                                                                                                                                                                                                                                                                                                                                                                                                                                                                                                                                                                                                                                                                       |
| Secondary Subject Heading:      | Epidemiology, Public health                                                                                                                                                                                                                                                                                                                                                                                                                                                                                                                                                                                                                                                                                                                                                                                                                                                                                                                                        |
| Keywords:                       | Hypertension < CARDIOLOGY, General diabetes < DIABETES & ENDOCRINOLOGY, EPIDEMIOLOGY, PUBLIC HEALTH                                                                                                                                                                                                                                                                                                                                                                                                                                                                                                                                                                                                                                                                                                                                                                                                                                                                |
|                                 |                                                                                                                                                                                                                                                                                                                                                                                                                                                                                                                                                                                                                                                                                                                                                                                                                                                                                                                                                                    |

SCHOLARONE™  
Manuscripts

1  
2  
3  
4  
5  
6  
7  
8  
9  
10  
11  
12  
13  
14  
15  
16  
17  
18  
19  
20  
21  
22  
23  
24  
25  
26  
27  
28  
29  
30  
31  
32  
33  
34  
35  
36  
37  
38  
39  
40  
41  
42  
43  
44  
45  
46  
47  
48  
49  
50  
51  
52  
53  
54  
55  
56  
57  
58  
59  
60

1           **Increased Waist Circumference and Prevalence of Type 2 Diabetes and Hypertension in**  
2           **Chinese Adults: Two Population-based Cross-sectional Surveys in Shanghai, China**

4   Ye Ruan, MD, PhD <sup>1</sup>, Miao Mo, MD <sup>2</sup>, Lisa Joss-Moore, PhD <sup>3</sup>, Yan Yun Li, MD <sup>1</sup>, Qun Di Yang,  
5   MD, MPH <sup>1</sup>, Liang Shi, MD <sup>1</sup>, Hua Zhang, MD <sup>2</sup>, Rui Li, MD <sup>1\*</sup>, Wang Hong Xu, MD, PhD <sup>2\*</sup>

7   **AFFILIATIONS:**

8   <sup>1</sup> Department of Diabetes Prevention and Control, Shanghai Municipal Center for Disease Control  
9   and Prevention, 1380 Zhong Shan Xi Road, Shanghai, 200336, People's Republic of China

10   <sup>2</sup> Department of Epidemiology, School of Public Health, Fudan University; Key Laboratory of  
11   Public Health Safety, Ministry of Education (Fudan University), 138 Yi Xue Yuan Road, Shanghai,  
12   200032, People's Republic of China

13   <sup>3</sup> Division of Neonatology, University of Utah, Salt Lake City, Utah 84108, USA

15   **Correspondence to:**

16   Wang Hong Xu, MD, Ph.D,

17   Associate professor

18   Department of Epidemiology

19   School of Public Health

20   Fudan University

21   138 Yi Xue Yuan Road

22   Shanghai 200032

23   P. R. China

24   Tel: 86-21-54237679

25   Fax: 86-21-54237334

26   Email: wanghong.xu@fudan.edu.cn

1  
2 27

3  
4 or

5  
6 Rui Li, MD

7  
8 Department of Diabetes Prevention and Control

9  
10 Shanghai Municipal Center for Disease Control and Prevention

11  
12 1380 Zhong Shan Xi Road

13  
14 Shanghai 200336

15  
16 P. R. China

17  
18 Tel: 86-21-62758710

19  
20 Email: rli@scdc.sh.cn

21  
22  
23  
24  
25  
26  
27  
28  
29  
30  
31  
32  
33  
34  
35  
36  
37

38 **RUNNING HEADER:** Obesity and prevalence of hypertension and T2DM in Chinese adults

39

40 **Word Count:**

41 Abstract: 249

42 Text: 2,533

43  
44  
45  
46  
47  
48  
49  
50  
51  
52  
53  
54  
55  
56  
57  
58  
59  
60

1  
2  
3  
44 **Abstract:**

45 **Objective:** To evaluate the changes in body mass index (BMI) and waist circumference (WC)  
46 and their associations with the prevalence of hypertension and type 2 diabetes (T2DM) in Chinese  
47 adults.

48 **Design:** Two consecutive population-based cross-sectional surveys.

49 **Setting:** A total of 12 districts and 7 counties in Shanghai, China.

50 **Participants:** 12,329 randomly selected participants of the survey in 2002-2003, and 7,423  
51 randomly selected participants of the survey in 2009. All subjects were residents of Shanghai aged  
52 35-74 years old.

53 **Outcome measures:** Measured BMI and WC. Previously-diagnosed and newly-identified  
54 hypertension and T2DM by measured blood pressure, fasting and post-load glucose.

55 **Results:** While the participants of the two surveys were comparable in BMI in each age group,  
56 the participants of the 2009 survey had significantly larger WC than those of the 2002-03 survey,  
57 with an annual percentage change (APC) being higher among subjects aged 45-49 years old in both  
58 men and women. The increase in prevalence of T2DM was observed in all age groups and also  
59 appeared more evident in subjects aged 45-49 years old. The prevalence of hypertension was  
60 observed to increase more rapidly in elderly men and middle-aged women. Obesity, both overt and  
61 central, was associated with the risk of the two diseases, but BMI was more strongly linked to  
62 hypertension while WC appeared more evidently related with T2DM.

63 **Conclusion:** The prevalence of central obesity and related chronic diseases has been  
64 increasing in Shanghai, China. Our findings provide useful information for the projection of a more  
65 rapidly growing burden of T2DM than hypertension in Chinese adults.

66  
67 **Keywords:** type 2 diabetes; hypertension; prevalence; body mass index; waist circumference

68

## Article summary

### Article focus

- The shift in BMI and WC among Chinese adults over past one decade.
- The contribution of changes in overall and central obesity to the increasing burden of chronic disease in China.

### Key messages

- The WC increased in Chinese adults over the decade spanning 2002-2009, while BMI did not change over the same period.
- BMI was more strongly linked to hypertension while WC appeared more evidently related with T2DM in Chinese adults.
- Our findings provide useful information for the projection of a more rapidly growing burden of T2DM than hypertension in Chinese adults.

### Strengths and limitations of this study

- The strengths of this study include the strict process of multistage sampling in adult population of Shanghai, anthropometric measurement according to a standardized protocol and fasting and postprandial blood glucose tests for the participants.
- The nature of the cross-sectional study design limits our ability to directly evaluate the influence of overall and central obesity as well as the change of their prevalence on the risk of hypertension and T2DM.
- The differences in several demographic characteristics between the participants of the two surveys indicate the possibility of selection bias.

69

70

## 71 **Introduction**

72 A rising worldwide prevalence of chronic disease, manifested primarily as hypertension and  
73 type 2 diabetes (T2DM), has been well documented [1-4]. In Chinese aged 15-74 years old, the  
74 prevalence of hypertension increased from 5.11% in 1959, 7.73% in 1979 [5] and 13.58% in 1991[6]  
75 to 17.65% in 2002 [7]. The prevalence of T2DM tripled between 1980 (about 1.0%) and 1996  
76 (3.2%) [8 9], and reached 9.7% in 2008 among adults at 20 years old or above [10]. It is estimated  
77 that over 92 million people in China have T2DM. This represents approximately half of the world's  
78 diabetic population, and places China at the “global epicenter of the diabetes epidemic” [4].

79 Both hypertension and T2DM are associated with obesity [11 12]. Obesity is often measured  
80 by body mass index (BMI). Across the entire range of BMI, the risk of hypertension and T2DM  
81 increases, making a higher BMI a strong predictor of both hypertension and T2DM [4 12-14].  
82 However, a significant proportion of Asian adults diagnosed with T2DM are with the normal BMI,  
83 ie.18.5-25.0 kg/m<sup>2</sup> [15 16]. BMI is a general indicator of overt obesity, but does not give  
84 information about the distribution of obesity. Central obesity, often assessed via waist  
85 circumference (WC), is also strongly correlated with T2DM in both European and Asian adults [11  
86 17]. While changes in BMI have been well documented in China over past several decades [2 18],  
87 changes in WC, and thus central obesity, are not well described.

88 In this study, we took advantage of the data from population based cross-sectional surveys  
89 conducted in Shanghai in 2002-03 and in 2009. We used the data from the two surveys to evaluate  
90 correlations between shifts in BMI and WC with the prevalence of hypertension and T2DM in  
91 Chinese adults. Our results may help to better understand the contribution of overall obesity and  
92 central obesity in the increasing burden of chronic disease in China.

## 93 **Materials and Methods**

### 94 **Study Participants**

95 A representative sample of the general population was randomly selected through a multistage  
96 sampling process in the 2002-03 survey. Firstly, 4 districts and 2 counties were randomly selected

1  
2 97 from a total of 12 districts and 7 counties in Shanghai, China. And then, 1-2 sub-districts or towns  
3  
4 98 were randomly selected from each selected district or county. Next, 1-2 communities or villages,  
5  
6 99 usually 1,000-2,000 residents for each, were randomly selected from each selected sub-district or  
7  
8 100 town. Finally, eligible subjects (permanent residents of Shanghai, 15-74 years old and having been  
9  
10 101 in the city for at least 5 years) were randomly selected from the selected communities and villages  
11  
12 102 and were invited for participation. Pregnant women, individuals with type I diabetes, and physically  
13  
14 103 or mentally disabled persons were excluded from the participation. During the period of May  
15  
16 104 2002-October 2003, a total of 17,526 eligible subjects were recruited, and 14,401 (82.17%)  
17  
18 105 participated the survey.

21 106 The 2009 survey used the similar sampling method except that only 7 communities and  
22  
23 107 villages were randomly selected in the third stage of sampling. The inclusion and exclusion criteria  
24  
25 108 of the 2009 survey were also similar to those for the 2002-03 survey, except that only those at the  
26  
27 109 age of 35-74 years old were eligible for the 2009 survey. Among 7,627 eligible adults contacted  
28  
29 110 during the period of May-July 2009, 7,414 (97.21%) were interviewed and donated blood samples.

32 111 To make the two surveys comparable, we excluded 1,071 subjects younger than 35 years from  
33  
34 112 the 2002-03 survey. After further excluding subjects with missing information, the final analysis  
35  
36 113 included 5,050 men and 7,279 women in the 2002-03 survey and 3,461 men and 3,962 women in  
37  
38 114 the 2009 survey. The Institutional Review Board at Shanghai Municipal Center of Disease Control  
39  
40 115 and Prevention approved the study. Informed consent was obtained from each participant before  
41  
42 116 data collection.

#### 46 117 **Data Collection**

48 118 A similar survey approach was followed by the two investigations. In both surveys,  
49  
50 119 information on demographic and socioeconomic factors, diagnosis of diabetes, tobacco and alcohol  
51  
52 120 use, physical activity and family history of diabetes was collected by trained interviewers with a  
53  
54 121 structured questionnaire at community clinics located in the residential areas of the participants.

56 122 At the interview, each participant's blood pressure, body weight, standing height, and waist

1  
2 123 circumference (WC) were measured by trained staff. Blood pressure was measured on the right arm  
3  
4 124 in the sitting position using standard mercury sphygmomanometer after at least 5 minutes of rest.  
5  
6 125 The first and fifth Korotkoff sounds were recorded. Body weight and height were recorded while  
7  
8 126 the subject was in light clothing and without shoes. Body weight was measured with electronic  
9  
10 127 scales to the nearest 0.1 kg. Body height was measured to the nearest 0.1 cm by using a stadiometer.  
11  
12 128 WC, recorded to the nearest 0.1 cm, was taken with a cloth tape and was measured on bare skin at  
13  
14 129 the midline between the lower border of the ribs and the iliac crest in the horizontal plane after a  
15  
16 130 normal expiration. Two measurements were taken and the mean of the replicates was used in the  
17  
18 131 following analyses. Body mass index (BMI) was calculated as weight in kilograms divided by  
19  
20 132 height in meters squared ( $\text{kg}/\text{m}^2$ ) using the direct measurements.  
21  
22  
23

### 24 133 **Laboratory Measurements**

25  
26 134 After at least 10 hours of overnight fasting, 1-1.5 ml venous blood specimen was collected in a  
27  
28 135 vacuum tube containing sodium fluoride. All participants with no history of diabetes and having a  
29  
30 136 fasting plasma glucose level of  $< 7.0$  mmol per liter (mmol/l) were then asked to have an oral  
31  
32 137 glucose-tolerance test (OGTT). Blood samples were drawn at 0 and 120 minutes after a standard 75  
33  
34 138 gram glucose load. Plasma glucose was measured with Glucose oxidase-peroxidase (GOD-PAP)  
35  
36 139 method.  
37  
38

### 39 140 **Diagnosis of T2DM and Hypertension**

40  
41 141 Previously diagnosed T2DM and hypertension was identified by a positive response from the  
42  
43 142 participant to the question of “Have you ever diagnosed with T2DM/hypertension by a doctor?” and  
44  
45 143 confirmed by medical records in which prescriptions of anti-hypertensive or hypoglycemic  
46  
47 144 medications were presented. The consistent rate was 100%. For those who had a negative response,  
48  
49 145 the T2DM was diagnosed with measured glucose level by using the 1999 World Health  
50  
51 146 Organization diagnostic criteria [Department of Noncommunicable Disease Surveillance. Definition,  
52  
53 147 diagnosis and classification of diabetes mellitus and its complications: report of a WHO  
54  
55 148 consultation. Part 1. Diagnosis and classification of diabetes mellitus. Geneva: World Health  
56  
57  
58  
59  
60



1  
2 149 Organization, 1999. (Accessed July 5, 2010, at\_  
3  
4 150 [http://www.staff.ncl.ac.uk/philip.home/who\\_dmg.pdf](http://www.staff.ncl.ac.uk/philip.home/who_dmg.pdf).)] and hypertension referred to the subjects  
5  
6 151 with measured systolic blood pressure (SBP)  $\geq$  140 mmHg or diastolic blood pressure (DBP)  $\geq$  90  
7  
8 152 mmHg and confirmed by clinical visits. Total T2DM and hypertension included both previously  
9  
10 153 diagnosed and newly-diagnosed patients. 42.7% (1,110 of 2,598) diabetic patients and 10.3% (694  
11  
12 154 of 6,735) hypertensive patients were newly-diagnosed in the two surveys.

### 155 **Statistical Analysis**

156 SAS software 9.2 was used for all the statistical analyses. Characteristics of the subgroups  
157 were described using summary statistics (median, 25<sup>th</sup> and 75<sup>th</sup> percentile, frequencies, and  
158 percentages) separately for men and women. The differences between two surveys were compared  
159 using  $\chi^2$  test (category variables) and Wilcoxon tests (continuous variables). The annual percentage  
160 changes (APC) in prevalence between two surveys were calculated as (prevalence in 2009 –  
161 prevalence in 2002-03) / number of years using logarithms for each age group. Percentile curves  
162 were constructed for BMI and WC values in the two surveys by gender using the LMS (lambda, mu,  
163 sigma) method. Restricted cubic splines (RCS) were used to model a potential curvilinear  
164 relationship of BMI and WC with hypertension and diabetes using the 5<sup>th</sup>, 25<sup>th</sup>, 75<sup>th</sup> and 95<sup>th</sup>  
165 percentiles as fixed knots and the 50<sup>th</sup> percentile as the reference. Polynomial logistic regression  
166 were used to estimate the odds ratios (OR) and 95% confidence intervals (95% CI) of BMI and WC  
167 with T2DM and hypertension. Meta-analysis was applied to obtain the combined ORs and 95% CI  
168 considering the potential heterogeneity of the populations in the two surveys. The residual method  
169 was used to derive the independent effect of BMI and WC with each other in the models. *P* value  
170 less than 0.05 was considered as a test of significance based on two sides.

### 171 **Results**

172 The male participants in two surveys were similar in age, resident site and cigarette smoking  
173 while the females were comparable in cigarette smoking (*P* > 0.05) (Table 1). Compared to the  
174 subjects in 2002-03 survey, the participants of 2009 survey, both men and women, had lower level

1  
2 175 of education, higher level of income per capita, more prior history of T2DM, higher frequency of  
3  
4 176 alcohol drinking and lower frequency of leisure time activity, and were more likely to have a family  
5  
6 177 history of diabetes.  
7

8  
9 178 Figure 1 shows the shapes of the BMI and WC distribution curves among men and women  
10  
11 179 changed over the period of the two surveys. After adjusting for age, education, per capita income,  
12  
13 180 resident site, smoking, drinking, regular exercise, and family history of T2DM, the curves of BMI  
14  
15 181 were almost overlapped in both men and women. However, the WC curves for men and women  
16  
17 182 were shifted to the right between 2002-03 and 2009, with the mean WC increasing from 83.6 to  
18  
19 183 85.3 cm for men and from 78.4 to 80.6 cm for women.  
20

21  
22 184 As presented in table 2, the prevalence of obesity, both overall and central, increased with  
23  
24 185 increasing age groups. While the prevalence of overall obesity ( $BMI \geq 28 \text{ kg/m}^2$ ) did not changed  
25  
26 186 between two surveys (all  $P$  values  $> 0.05$ ), the prevalence of central obesity were significantly  
27  
28 187 higher in 2009 survey in each age group (all  $P$  values  $< 0.001$ ). A more pronounced increase in  
29  
30 188 prevalence of central obesity and T2DM was observed among subjects aged 45-49 years old in both  
31  
32 189 men and women; whereas the change in prevalence of hypertension between two surveys appeared  
33  
34 190 more evident in older men and younger women over the period. Using the World Health  
35  
36 191 Organization (WHO) criteria for obesity did not change the results substantially (data not shown in  
37  
38 192 the tables).  
39  
40

41  
42 193 BMI and WC were highly correlated with each other, with a correlation coefficient of 0.77 ( $P <$   
43  
44 194 0.0001) among men and 0.78 ( $P < 0.0001$ ) among women after adjusting for age. Therefore, the  
45  
46 195 residual method was used to test the potential respective non-linear relationships of BMI and WC  
47  
48 196 with the risk of T2DM and hypertension (Figure 2). The dose-response analysis likewise showed a  
49  
50 197 statistically significant increased risk of T2DM at high level of WC and a significant elevated risk  
51  
52 198 of hypertension at high level of BMI in both men and women after adjusting for age, education, per  
53  
54 199 capita income, resident site, smoking, drinking, regular exercise, family history of T2DM and phase  
55  
56 200 of surveys, with  $P$  values for non-linear relationship tests  $< 0.05$ . No significant relationship was  
57  
58  
59  
60

1  
2 201 observed between BMI and T2DM in men and between WC and hypertension in women.

3  
4 202 As shown in table 3, in both sexes, BMI adjusted for WC (residuals) appeared more strongly  
5  
6 203 associated with hypertension while WC adjusted for BMI (residuals) was more evidently related  
7  
8 204 with T2DM. Comparing with the lowest quartile of BMI residuals, the risk of hypertension  
9  
10 205 increased 85% (95%CI: 1.59-2.15) in men and 1.23-fold (95%CI: 1.94-2.57) in women, whereas  
11  
12 206 the risk of T2DM did not increase significantly in both sexes. On the other hand, the ORs of the  
13  
14 207 highest versus the lowest quartile WC residuals for T2DM were 1.75 (95%CI: 1.33-2.30) in men  
15  
16  
17 208 and 2.37 (95%CI: 1.78-3.15) in women, higher than the OR of 1.57 (95%CI: 1.35-1.82) in men and  
18  
19 209 1.13 (95%CI: 0.98-1.30) in women for hypertension.

20  
21 210 We further evaluated the potential joint effect of BMI and WC on T2DM and hypertension  
22  
23 211 (table 4). The participants were classified into normal weight (BMI 18.5-23.9 kg/m<sup>2</sup>), overweight  
24  
25 212 (24.0-27.9 kg/m<sup>2</sup>), or obese ( $\geq 28$  kg/m<sup>2</sup>) based on data from Chinese adults, and were defined as  
26  
27 213 with normal or increased WC using sex-specific cut-offs (85 cm in men and 80 cm in women) [19].  
28  
29 214 The risk of T2DM and hypertension increased across groups defined by BMI and WC, with the  
30  
31 215 highest risk observed among men with the lowest BMI but a higher WC, and among those with the  
32  
33 216 highest BMI and a higher WC for hypertension. However, no significant interaction was observed  
34  
35 217 between BMI and WC (all *P* values for interaction tests  $> 0.05$ ).

## 36 37 38 39 40 218 **Discussion**

41  
42 219 In this representative sample of the adult population in Shanghai, the largest city in China, we  
43  
44 220 observed an increased prevalence of central obesity, hypertension and T2DM over the decade  
45  
46 221 spanning 2002-2009. In contrast, BMI did not change over the same period. Our results present a  
47  
48 222 snapshot of overt versus central obesity in the Chinese population and suggest that the epidemic of  
49  
50 223 central obesity in this population, which has been more closely associated with the prevalence of  
51  
52 224 T2DM, may lead to a more rapidly growing burden of T2DM in China.

53  
54  
55 225 Chinese adults have lower rates of overweight and obesity than their Western counterparts  
56  
57 226 using the WHO criteria (BMI  $\geq 25$  kg/m<sup>2</sup> for overweight and BMI  $\geq 30$  kg/m<sup>2</sup> for obesity) [15 16].  
58  
59  
60

1  
2 227 Nevertheless, increasing trends of BMI in Chinese adults have been well documented [18 20]. In  
3  
4 228 two national nutritional surveys undertaken in 1982 and 1992 in China, the prevalence of  
5  
6 229 overweight/obesity ( $BMI \geq 25 \text{ kg/m}^2$ ) in subjects 20-70 years of age was 10% and 15%,  
7  
8 230 respectively. Between 1992 and 2002, the combined prevalence of overweight and obesity increased  
9  
10 231 from 14.6 to 21.8% [21]. Interestingly, the increase in BMI among Chinese adults has slowed down  
11  
12 232 during past decades [2]. In this study, we did not observe an increase in BMI and prevalence of  
13  
14 233 obesity defined by the Chinese obesity standards or by WHO criteria (data not shown). Instead, we  
15  
16 234 observed a significant increase in WC, a measure of central obesity between surveys. Our  
17  
18 235 observation of increased WC in Chinese adults, without a concomitant increase in BMI, represents  
19  
20 236 an increasing burden of central obesity in this population. The increase in central obesity indicates  
21  
22 237 an upward trend in body fat percentages in the population who have been previously observed with  
23  
24 238 higher body fat percentages compared to other ethnic people with the same BMI [22 23].

25  
26  
27  
28 239 Both epidemic of overall and central obesity parallel a continuously increasing prevalence of  
29  
30 240 hypertension and T2DM in China [21]. Several studies indicate that overall obesity (BMI) is more  
31  
32 241 strongly associated with hypertension, while central obesity (WC) is more strongly associated with  
33  
34 242 T2DM [17 24-26]. The rationale for these associations is based on the notion that central obesity  
35  
36 243 reflects specific accumulation of visceral adipose tissue. Excess visceral adipose tissue is  
37  
38 244 metabolically unfavorable due to productions of free fatty acids and inflammatory mediators.  
39  
40 245 Overall obesity, on the other hand, represents a greater overall physiologic strain and effects  
41  
42 246 vascular and cardiac parameters more significantly. In this study, we observed a significant increase  
43  
44 247 in prevalence of T2DM regardless of gender or age groups, which was more pronounced than the  
45  
46 248 change in the prevalence of hypertension during the period of 2002-03 and 2009. We also observed  
47  
48 249 a closer association of central obesity with the prevalence of T2DM than with the prevalence of  
49  
50 250 hypertension. These results support the notion that central obesity in particular is a stronger risk  
51  
52 251 factor for T2DM than for hypertension in Chinese adults. Due to the cross-sectional design,  
53  
54 252 however, our study was unable to make a causal inference.  
55  
56  
57  
58  
59  
60

1  
2 253 The nature of the cross-sectional study design limits our ability to directly evaluate the  
3  
4 254 influence of overall and central obesity as well as the change of their prevalence on the risk of  
5  
6 255 hypertension and T2DM. The differences in several demographic characteristics between the  
7  
8 256 participants of the two surveys indicate the possibility of selection bias. However, there are several  
9  
10 257 strengths, including the strict process of multistage sampling in adult population in Shanghai,  
11  
12 258 anthropometric measurement according to a standardized protocol and fasting and postprandial  
13  
14 259 blood glucose tests for the participants.

## 18 260 **Conclusions**

20 261 In summary, this study describes the potential association of central obesity with an upward  
21  
22 262 trend of T2DM, implicating a more rapidly growing burden of T2DM than hypertension in Chinese  
23  
24 263 adults. The findings in Shanghai, the largest city and one of the most economically developed areas  
25  
26 264 in China, provide useful information for the projection of future trends in the whole country.

## 30 265 **Acknowledgements**

32 266 We thank Dr. Xiao-ou Shu and Dr. Hui Cai of Vanderbilt University for their contributions in  
33  
34 267 study design and data analysis. The authors thank the study participants of the two cross-sectional  
35  
36 268 surveys and the healthcare workers in each community involved.

## 39 269 **Footnotes**

42 270 **Contributors** YR and MM contributed to data collection, data analysis and draft of the paper.  
43  
44 271 YR, YYL, QDY, and LS contributed to data collection and quality control. LJM contributed to  
45  
46 272 revision of the paper. HZ contributed to data clean and analysis. RL and WHX contributed to study  
47  
48 273 design, statistical analysis and revision of the paper. All authors contributed to the interpretation of  
49  
50 274 data and revision of the manuscript. All authors approved the final version.

53 275 **Funding** This study was supported by the Key Program of Shanghai Municipal Committee of  
54  
55 276 Science and Technology (04 DZ19502), the Shanghai Medical Development Program (01ZD001)  
56  
57 277 and the Shanghai Municipal Health Bureau (GWDTR201204). W. H. Xu was supported by a  
58  
59  
60

1  
2  
3  
4  
5  
6  
7  
8  
9  
10  
11  
12  
13  
14  
15  
16  
17  
18  
19  
20  
21  
22  
23  
24  
25  
26  
27  
28  
29  
30  
31  
32  
33  
34  
35  
36  
37  
38  
39  
40  
41  
42  
43  
44  
45  
46  
47  
48  
49  
50  
51  
52  
53  
54  
55  
56  
57  
58  
59  
60

278 training grant from the Fogarty International Center (D43 TW008313 to X. O. Shu). The funders  
279 had no role in study design, data collection or analysis, decision to publish, or preparation of the  
280 manuscript.

281 **Conflict of Interest:** None declared.

282

For peer review only

## 283 REFERENCES

- 284 1. Kelly T, Yang W, Chen CS, Reynolds K, He J. Global burden of obesity in 2005 and projections to 2030. *Int J Obes*  
285 (Lond) 2008;**32**(9):1431-7 doi: ijo2008102 [pii]  
286 10.1038/ijo.2008.102[published Online First: Epub Date].
- 287 2. Popkin BM. Recent dynamics suggest selected countries catching up to US obesity. *Am J Clin Nutr*  
288 2010;**91**(1):284S-88S doi: ajcn.2009.28473C [pii]  
289 10.3945/ajcn.2009.28473C[published Online First: Epub Date].
- 290 3. Shaw JE, Sicree RA, Zimmet PZ. Global estimates of the prevalence of diabetes for 2010 and 2030. *Diabetes Res*  
291 *Clin Pract* 2010;**87**(1):4-14 doi: S0168-8227(09)00432-X [pii]  
292 10.1016/j.diabres.2009.10.007[published Online First: Epub Date].
- 293 4. Hu FB. Globalization of diabetes: the role of diet, lifestyle, and genes. *Diabetes care* 2011;**34**(6):1249-57 doi:  
294 10.2337/dc11-0442[published Online First: Epub Date].
- 295 5. Wu YK, Lu CQ, Gao RC, Yu JS, Liu GC. Nation-wide hypertension screening in China during 1979-1980. *Chin Med*  
296 *J (Engl)* 1982;**95**(2):101-8
- 297 6. Wu X, Duan X, Gu D, Hao J, Tao S, Fan D. Prevalence of hypertension and its trends in Chinese populations. *Int J*  
298 *Cardiol* 1995;**52**(1):39-44 doi: 016752739502443Z [pii][published Online First: Epub Date].
- 299 7. Wu Y, Huxley R, Li L, et al. Prevalence, awareness, treatment, and control of hypertension in China: data from the  
300 China National Nutrition and Health Survey 2002. *Circulation* 2008;**118**(25):2679-86 doi:  
301 10.1161/CIRCULATIONAHA.108.788166  
302 118/25/2679 [pii][published Online First: Epub Date].
- 303 8. [A mass survey of diabetes mellitus in a population of 300,000 in 14 provinces and municipalities in China (author's  
304 transl)]. *Zhonghua Nei Ke Za Zhi* 1981;**20**(11):678-83
- 305 9. Wang K, Li T, Xiang H. [Study on the epidemiological characteristics of diabetes mellitus and IGT in China].  
306 *Zhonghua Liu Xing Bing Xue Za Zhi* 1998;**19**(5):282-5
- 307 10. Yang W, Lu J, Weng J, et al. Prevalence of diabetes among men and women in China. *The New England journal of*  
308 *medicine* 2010;**362**(12):1090-101 doi: 10.1056/NEJMoa0908292[published Online First: Epub Date].
- 309 11. Nyamdorj R, Qiao Q, Lam TH, et al. BMI compared with central obesity indicators in relation to diabetes and  
310 hypertension in Asians. *Obesity (Silver Spring)* 2008;**16**(7):1622-35 doi: 10.1038/oby.2008.73  
311 oby200873 [pii][published Online First: Epub Date].
- 312 12. Ostchega Y, Hughes JP, Terry A, Fakhouri TH, Miller I. Abdominal obesity, body mass index, and hypertension in  
313 US adults: NHANES 2007-2010. *Am J Hypertens* 2012;**25**(12):1271-8 doi: 10.1038/ajh.2012.120  
314 ajh2012120 [pii][published Online First: Epub Date].
- 315 13. Barrett-Connor E. Epidemiology, obesity, and non-insulin-dependent diabetes mellitus. *Epidemiol Rev*  
316 1989;**11**:172-81
- 317 14. Weber MB, Oza-Frank R, Staimetz LR, Ali MK, Narayan KM. Type 2 diabetes in Asians: prevalence, risk factors,  
318 and effectiveness of behavioral intervention at individual and population levels. *Annu Rev Nutr*  
319 2012;**32**:417-39 doi: 10.1146/annurev-nutr-071811-150630[published Online First: Epub Date].
- 320 15. Lu B, Yang Y, Song X, et al. An evaluation of the International Diabetes Federation definition of metabolic  
321 syndrome in Chinese patients older than 30 years and diagnosed with type 2 diabetes mellitus. *Metabolism*  
322 2006;**55**(8):1088-96 doi: S0026-0495(06)00138-7 [pii]  
323 10.1016/j.metabol.2006.04.003[published Online First: Epub Date].
- 324 16. Tseng CH. Body mass index and waist circumference as determinants of coronary artery disease in Taiwanese adults  
325 with type 2 diabetes mellitus. *Int J Obes (Lond)* 2006;**30**(5):816-21 doi: 0803218 [pii]  
326 10.1038/sj.ijo.0803218[published Online First: Epub Date].
- 327 17. Feng RN, Zhao C, Wang C, et al. BMI is strongly associated with hypertension, and waist circumference is strongly  
328 associated with type 2 diabetes and dyslipidemia, in northern Chinese adults. *Journal of epidemiology / Japan*

- 1  
2 329 Epidemiological Association 2012;**22**(4):317-23
- 3 330 18. Wildman RP, Gu D, Muntner P, et al. Trends in overweight and obesity in Chinese adults: between 1991 and  
4 331 1999-2000. *Obesity (Silver Spring)* 2008;**16**(6):1448-53 doi: oby2008208 [pii]  
5 332 10.1038/oby.2008.208[published Online First: Epub Date]].
- 6 333 19. Zhou BF. Predictive values of body mass index and waist circumference for risk factors of certain related diseases in  
7 334 Chinese adults--study on optimal cut-off points of body mass index and waist circumference in Chinese adults.  
8 335 *Biomed Environ Sci* 2002;**15**(1):83-96
- 9 336 20. Wang H, Du S, Zhai F, Popkin BM. Trends in the distribution of body mass index among Chinese adults, aged 20-45  
10 337 years (1989-2000). *Int J Obes (Lond)* 2007;**31**(2):272-8 doi: 0803416 [pii]  
11 338 10.1038/sj.ijo.0803416[published Online First: Epub Date]].
- 12 339 21. Wang Y, Mi J, Shan XY, Wang QJ, Ge KY. Is China facing an obesity epidemic and the consequences? The trends in  
13 340 obesity and chronic disease in China. *Int J Obes (Lond)* 2007;**31**(1):177-88 doi: 0803354 [pii]  
14 341 10.1038/sj.ijo.0803354[published Online First: Epub Date]].
- 15 342 22. Wang J, Thornton JC, Burastero S, et al. Comparisons for body mass index and body fat percent among Puerto  
16 343 Ricans, blacks, whites and Asians living in the New York City area. *Obes Res* 1996;**4**(4):377-84
- 17 344 23. Araneta MR, Wingard DL, Barrett-Connor E. Type 2 diabetes and metabolic syndrome in Filipina-American  
18 345 women : a high-risk nonobese population. *Diabetes Care* 2002;**25**(3):494-9
- 19 346 24. Jacobs EJ, Newton CC, Wang Y, et al. Waist circumference and all-cause mortality in a large US cohort. *Archives of*  
20 347 *internal medicine* 2010;**170**(15):1293-301 doi: 10.1001/archinternmed.2010.201[published Online First: Epub  
21 348 Date]].
- 22 349 25. InterAct C, Langenberg C, Sharp SJ, et al. Long-term risk of incident type 2 diabetes and measures of overall and  
23 350 regional obesity: the EPIC-InterAct case-cohort study. *PLoS medicine* 2012;**9**(6):e1001230 doi:  
24 351 10.1371/journal.pmed.1001230[published Online First: Epub Date]].
- 25 352 26. Li R, Shi L, Jia J, et al. Differentiating the Associations of Waist Circumference and Body Mass Index With  
26 353 Cardiovascular Disease Risk in a Chinese Population. *Asia-Pacific journal of public health / Asia-Pacific*  
27 354 *Academic Consortium for Public Health* 2012 doi: 10.1177/1010539512465306[published Online First: Epub  
28 355 Date]].
- 29 356  
30 357  
31  
32  
33  
34  
35  
36  
37  
38  
39  
40  
41  
42  
43  
44  
45  
46  
47  
48  
49  
50  
51  
52  
53  
54  
55  
56  
57  
58  
59  
60



1  
2 358 Figure 1. Shift in BMI and WC over the period of the two population-based surveys

3  
4 359 Figure 2. Non-linear dose-response relationship of BMI and WC with hypertension and T2DM

5  
6 360 among participants of the two population-based surveys

7  
8 361

9  
10  
11  
12  
13  
14  
15  
16  
17  
18  
19  
20  
21  
22  
23  
24  
25  
26  
27  
28  
29  
30  
31  
32  
33  
34  
35  
36  
37  
38  
39  
40  
41  
42  
43  
44  
45  
46  
47  
48  
49  
50  
51  
52  
53  
54  
55  
56  
57  
58  
59  
60

For peer review only

362 Table 1. Characteristics of participants in two population-based surveys in Shanghai, China

| Characteristics                  | 1 <sup>st</sup> survey |                    | 2 <sup>nd</sup> survey |                    | <i>P-value between surveys<sup>a</sup></i> |                 |
|----------------------------------|------------------------|--------------------|------------------------|--------------------|--------------------------------------------|-----------------|
|                                  | Men<br>(N=5,050)       | Women<br>(N=7,279) | Men<br>(N=3,461)       | Women<br>(N=3,962) | <i>In men</i>                              | <i>In women</i> |
| Age (yrs., mean ± SD)            | 54.8 ± 10.8            | 53.1 ± 10.3        | 54.7 ± 9.5             | 54.7 ± 9.1         | 0.55                                       | <0.0001         |
| Resident site (%)                |                        |                    |                        |                    |                                            |                 |
| Urban                            | 71.1                   | 63.0               | 72.4                   | 72.0               |                                            |                 |
| Rural                            | 29.0                   | 37.0               | 27.7                   | 28.0               | 0.19                                       | <0.0001         |
| Education (%)                    |                        |                    |                        |                    |                                            |                 |
| No formal education              | 4.1                    | 18.4               | 3.2                    | 9.5                |                                            |                 |
| Primary school                   | 18.2                   | 23.0               | 14.7                   | 17.7               |                                            |                 |
| Middle school                    | 35.3                   | 31.1               | 45.7                   | 45.2               |                                            |                 |
| High school                      | 27.6                   | 22.6               | 27.6                   | 23.8               |                                            |                 |
| College or above                 | 14.8                   | 4.9                | 8.8                    | 3.9                | 0.0025                                     | <0.0001         |
| Per capita income (yuan/mo.) (%) |                        |                    |                        |                    |                                            |                 |
| <1000                            | 37.0                   | 45.5               | 4.9                    | 4.0                |                                            |                 |
| 1000-2999                        | 38.3                   | 38.4               | 41.8                   | 46.7               |                                            |                 |
| 3000-5000                        | 22.5                   | 17.9               | 33.2                   | 33.3               |                                            |                 |
| >5000                            | 2.2                    | 1.3                | 20.0                   | 16.0               | <0.0001                                    | <0.0001         |
| Family history of type 2diabetes | 12.3                   | 13.1               | 16.4                   | 19.0               | <0.0001                                    | <0.0001         |
| Prevalence of type 2diabetes (%) | 13.6                   | 10.3               | 17.4                   | 14.1               | <0.0001                                    | <0.0001         |
| Prevalence of hypertension (%)   | 34.8                   | 28.3               | 41.8                   | 37.1               | <0.0001                                    | <0.0001         |
| Cigarette smoking (%)            | 61.4                   | 1.7                | 62.6                   | 1.8                | 0.22                                       | 0.93            |
| Alcohol drinking (%)             | 40.4                   | 2.4                | 54.0                   | 5.0                | <0.0001                                    | <0.0001         |
| Leisure-time activity (%)        | 13.3                   | 13.1               | 10.8                   | 9.0                | 0.0009                                     | <0.0001         |

363 <sup>a</sup> *P* for Wilcoxon tests or chi-square tests

Table 2. Prevalence of obesity, hypertension and type 2 diabetes in participants of the two population-based surveys by age groups in Shanghai, China

|                         | No. of subjects        |                        | Overall Obesity        |                        | APC   | Central obesity        |                        | APC  | Hypertension           |                        | APC   | Type 2 diabetes        |                        | APC   |
|-------------------------|------------------------|------------------------|------------------------|------------------------|-------|------------------------|------------------------|------|------------------------|------------------------|-------|------------------------|------------------------|-------|
|                         | 1 <sup>st</sup> survey | 2 <sup>nd</sup> survey | 1 <sup>st</sup> survey | 2 <sup>nd</sup> survey | (%)   | 1 <sup>st</sup> survey | 2 <sup>nd</sup> survey | (%)  | 1 <sup>st</sup> survey | 2 <sup>nd</sup> survey | (%)   | 1 <sup>st</sup> survey | 2 <sup>nd</sup> survey | (%)   |
| Men                     |                        |                        |                        |                        |       |                        |                        |      |                        |                        |       |                        |                        |       |
| Overall                 | 5050                   | 3461                   | 11.7                   | 11.9                   | 0.21  | 46.3                   | 53.8                   | 2.35 | 34.8                   | 41.8                   | 2.87  | 13.6                   | 17.4                   | 3.78  |
| Age-groups              |                        |                        |                        |                        |       |                        |                        |      |                        |                        |       |                        |                        |       |
| 35-                     | 414                    | 230                    | 10.5                   | 9.1                    | -2.11 | 41.8                   | 45.2                   | 1.22 | 15.2                   | 11.7                   | -3.92 | 4.6                    | 5.7                    | 3.25  |
| 40-                     | 574                    | 302                    | 10.0                   | 8.3                    | -2.83 | 41.8                   | 47.00                  | 1.85 | 22.5                   | 21.9                   | -0.43 | 7.8                    | 7.6                    | -0.44 |
| 45-                     | 837                    | 445                    | 12.6                   | 12.6                   | -0.04 | 44.0                   | 53.7                   | 3.12 | 25.3                   | 31.0                   | 3.16  | 7.8                    | 13.7                   | 9.13  |
| 50-                     | 833                    | 739                    | 12.2                   | 10.8                   | -1.76 | 44.1                   | 53.8                   | 3.12 | 33.1                   | 40.3                   | 3.07  | 12.7                   | 18.3                   | 5.72  |
| 55-                     | 628                    | 669                    | 10.4                   | 13.2                   | 3.78  | 47.3                   | 54.6                   | 2.25 | 35.4                   | 45.6                   | 3.99  | 15.0                   | 17.9                   | 2.82  |
| 60-                     | 507                    | 513                    | 10.5                   | 15.4                   | 6.18  | 48.7                   | 56.1                   | 2.19 | 44.6                   | 51.7                   | 2.29  | 15.6                   | 20.1                   | 3.98  |
| 65-                     | 674                    | 313                    | 12.6                   | 11.8                   | -0.99 | 51.4                   | 61.0                   | 2.67 | 49.4                   | 59.4                   | 2.88  | 20.8                   | 26.2                   | 3.64  |
| 70-                     | 583                    | 250                    | 13.8                   | 9.6                    | -5.40 | 51.1                   | 54.0                   | 0.85 | 50.9                   | 65.2                   | 3.87  | 24.2                   | 25.6                   | 0.88  |
| Women                   |                        |                        |                        |                        |       |                        |                        |      |                        |                        |       |                        |                        |       |
| Overall                 | 7279                   | 3962                   | 13.8                   | 13.8                   | 0.02  | 41.7                   | 54.2                   | 4.10 | 28.3                   | 37.1                   | 4.28  | 10.3                   | 14.1                   | 4.84  |
| Age-groups              |                        |                        |                        |                        |       |                        |                        |      |                        |                        |       |                        |                        |       |
| 35-                     | 615                    | 251                    | 7.5                    | 7.2                    | -0.65 | 22.6                   | 26.3                   | 2.35 | 6.8                    | 10.8                   | 7.24  | 3.3                    | 4.0                    | 3.17  |
| 40-                     | 1000                   | 287                    | 9.4                    | 11.2                   | 2.66  | 27.6                   | 38.0                   | 5.05 | 11.7                   | 15.7                   | 4.61  | 4.1                    | 5.9                    | 5.81  |
| 45-                     | 1491                   | 563                    | 11.0                   | 9.8                    | -1.82 | 32.3                   | 42.6                   | 4.38 | 19.3                   | 23.5                   | 3.03  | 5.8                    | 8.7                    | 6.32  |
| 50-                     | 1309                   | 866                    | 15.1                   | 14.1                   | -1.00 | 43.9                   | 54.0                   | 3.24 | 28.7                   | 31.0                   | 1.16  | 8.3                    | 9.4                    | 1.94  |
| 55-                     | 838                    | 818                    | 15.7                   | 13.6                   | -2.17 | 47.5                   | 60.6                   | 3.83 | 33.9                   | 39.7                   | 2.48  | 8.8                    | 15.3                   | 8.80  |
| 60-                     | 610                    | 585                    | 19.2                   | 18.1                   | -0.87 | 53.5                   | 63.1                   | 2.58 | 40.5                   | 52.8                   | 4.17  | 16.7                   | 19.2                   | 2.11  |
| 65-                     | 799                    | 327                    | 18.0                   | 18.4                   | 0.28  | 59.0                   | 66.1                   | 1.76 | 48.4                   | 59.3                   | 3.17  | 23.7                   | 27.8                   | 2.54  |
| 70-                     | 617                    | 265                    | 18.2                   | 16.6                   | -1.36 | 60.2                   | 68.7                   | 2.05 | 51.4                   | 64.5                   | 3.57  | 21.4                   | 27.2                   | 3.75  |
| All subjects            |                        |                        |                        |                        |       |                        |                        |      |                        |                        |       |                        |                        |       |
| Overall                 | 12329                  | 7423                   | 13.0                   | 12.9                   | -0.05 | 43.6                   | 54.0                   | 3.35 | 31.0                   | 39.3                   | 3.75  | 11.7                   | 15.6                   | 4.53  |
| Age-groups <sup>a</sup> |                        |                        |                        |                        |       |                        |                        |      |                        |                        |       |                        |                        |       |
| 35-                     | 1029                   | 481                    | 8.7                    | 8.0                    | -1.04 | 30.3                   | 33.9                   | 2.39 | 10.2                   | 11.2                   | 1.49  | 3.8                    | 4.7                    | 3.63  |
| 40-                     | 1574                   | 589                    | 9.6                    | 10.1                   | 0.11  | 32.7                   | 41.3                   | 4.14 | 15.6                   | 17.9                   | 2.92  | 5.5                    | 6.5                    | 3.41  |
| 45-                     | 2328                   | 1008                   | 11.6                   | 10.8                   | -0.77 | 36.5                   | 46.6                   | 4.16 | 21.5                   | 26.2                   | 3.46  | 6.5                    | 10.5                   | 8.22  |
| 50-                     | 2142                   | 1605                   | 13.9                   | 12.8                   | -1.53 | 44.0                   | 53.9                   | 3.19 | 30.4                   | 34.6                   | 0.90  | 10.0                   | 12.8                   | 4.69  |
| 55-                     | 1466                   | 1487                   | 13.4                   | 13.4                   | 0.01  | 47.4                   | 58.1                   | 3.13 | 34.5                   | 42.2                   | 3.20  | 11.5                   | 16.4                   | 5.75  |
| 60-                     | 1117                   | 1098                   | 15.2                   | 16.9                   | 1.59  | 51.3                   | 59.9                   | 2.39 | 42.4                   | 52.3                   | 3.29  | 16.2                   | 19.6                   | 2.96  |
| 65-                     | 1473                   | 640                    | 15.6                   | 15.4                   | -0.39 | 55.5                   | 63.8                   | 2.11 | 48.9                   | 59.4                   | 3.04  | 22.3                   | 27.1                   | 2.98  |
| 70-                     | 1200                   | 515                    | 16.0                   | 13.2                   | -2.94 | 55.8                   | 61.5                   | 1.52 | 51.2                   | 64.9                   | 3.71  | 22.8                   | 26.4                   | 2.32  |

<sup>a</sup> adjusted for sex according to the distribution in the first survey.

Table 3. Association of body size with hypertension and type 2 diabetes in two population-based surveys in Shanghai, China

|                      | No. of subjects with neither diseases | Type 2 diabetes only |                   | Hypertension only |                   | Both              |                  |
|----------------------|---------------------------------------|----------------------|-------------------|-------------------|-------------------|-------------------|------------------|
|                      |                                       | N                    | OR (95%CI)        | N                 | OR (95%CI)        | N                 | OR (95%CI)       |
| <b>BMI residuals</b> |                                       |                      |                   |                   |                   |                   |                  |
| Men                  |                                       |                      |                   |                   |                   |                   |                  |
| Q1                   | 1260                                  | 156                  | 1.00              | 529               | 1.00              | 175               | 1.00             |
| Q2                   | 1224                                  | 142                  | 0.99 (0.77, 1.27) | 583               | 1.16 (1.00, 1.34) | 172               | 1.11(0.87, 1.41) |
| Q3                   | 1164                                  | 132                  | 1.09 (0.84, 1.41) | 651               | 1.50 (1.29, 1.74) | 171               | 1.36(1.07, 1.73) |
| Q4                   | 1079                                  | 123                  | 1.16 (0.88, 1.51) | 709               | 1.85 (1.59, 2.15) | 207               | 1.95(1.54, 2.47) |
|                      | <i>P for trend</i>                    |                      | 0.2472            | <i>&lt;0.0001</i> |                   | <i>&lt;0.0001</i> |                  |
| Women                |                                       |                      |                   |                   |                   |                   |                  |
| Q1                   | 1816                                  | 166                  | 1.00              | 600               | 1.00              | 223               | 1.00             |
| Q2                   | 1866                                  | 148                  | 1.02 (0.80, 1.29) | 629               | 1.29 (1.12, 1.48) | 162               | 0.96(0.77, 1.21) |
| Q3                   | 1835                                  | 125                  | 0.89 (0.69, 1.15) | 687               | 1.51 (1.31, 1.73) | 158               | 1.03(0.82, 1.31) |
| Q4                   | 1634                                  | 109                  | 0.94 (0.73, 1.23) | 847               | 2.23 (1.94, 2.57) | 215               | 1.85(1.15, 2.98) |
|                      | <i>P for trend</i>                    |                      | 0.4864            | <i>&lt;0.0001</i> |                   | 0.0067            |                  |
| All subjects         |                                       |                      |                   |                   |                   |                   |                  |
| Q1                   | 3048                                  | 330                  | 1.00              | 1162              | 1.00              | 385               | 1.00             |
| Q2                   | 3079                                  | 282                  | 1.00 (0.84, 1.19) | 1200              | 1.22 (1.11, 1.35) | 363               | 1.03(0.87, 1.22) |
| Q3                   | 2998                                  | 278                  | 0.98 (0.82, 1.18) | 1346              | 1.50 (1.36, 1.67) | 302               | 1.18(1.00, 1.40) |
| Q4                   | 2753                                  | 211                  | 1.04 (0.86, 1.26) | 1527              | 2.05 (1.85, 2.27) | 433               | 1.88(1.60, 2.21) |
|                      | <i>P for trend</i>                    |                      | 0.2280            | <i>&lt;0.0001</i> |                   | <i>&lt;0.0001</i> |                  |
| <b>WC residuals</b>  |                                       |                      |                   |                   |                   |                   |                  |
| Men                  |                                       |                      |                   |                   |                   |                   |                  |
| Q1                   | 1376                                  | 102                  | 1.00              | 531               | 1.00              | 111               | 1.00             |
| Q2                   | 1232                                  | 131                  | 1.34 (1.02, 1.78) | 601               | 1.23 (1.06, 1.42) | 155               | 1.41(1.07, 1.84) |
| Q3                   | 1130                                  | 148                  | 1.39 (0.70, 2.77) | 644               | 1.39 (1.20, 1.62) | 197               | 1.73(1.33, 2.25) |
| Q4                   | 989                                   | 172                  | 1.75 (1.33, 2.30) | 696               | 1.57 (1.35, 1.82) | 262               | 2.25(1.74, 2.90) |
|                      | <i>P for trend</i>                    |                      | <i>&lt;0.0001</i> | <i>&lt;0.0001</i> |                   | <i>&lt;0.0001</i> |                  |
| Women                |                                       |                      |                   |                   |                   |                   |                  |
| Q1                   | 2019                                  | 80                   | 1.00              | 598               | 1.00              | 108               | 1.00             |
| Q2                   | 1935                                  | 102                  | 1.17 (0.86, 1.59) | 651               | 1.04 (0.91, 1.18) | 117               | 0.94(0.71, 1.25) |
| Q3                   | 1708                                  | 172                  | 2.04 (1.54, 2.70) | 732               | 1.14 (0.99, 1.30) | 194               | 1.40(1.08, 1.82) |
| Q4                   | 1489                                  | 194                  | 2.37 (1.78, 3.15) | 782               | 1.13 (0.98, 1.30) | 339               | 2.06(1.26, 3.38) |
|                      | <i>P for trend</i>                    |                      | <i>&lt;0.0001</i> | 0.0216            |                   | <i>&lt;0.0001</i> |                  |
| All subjects         |                                       |                      |                   |                   |                   |                   |                  |
| Q1                   | 3453                                  | 161                  | 1.00              | 1109              | 1.00              | 203               | 1.00             |
| Q2                   | 3192                                  | 260                  | 1.26 (0.99, 1.60) | 1211              | 1.12 (1.01, 1.23) | 260               | 1.16(0.82, 1.62) |
| Q3                   | 2838                                  | 301                  | 1.66 (1.16, 2.36) | 1373              | 1.25 (1.13, 1.38) | 412               | 1.55(1.29, 1.87) |
| Q4                   | 2395                                  | 379                  | 2.03 (1.66, 2.47) | 1542              | 1.34 (1.09, 1.64) | 608               | 2.18(1.83, 2.61) |
|                      | <i>P for trend</i>                    |                      | 0.0001            | 0.0021            |                   | <i>&lt;0.0001</i> |                  |

Missing value excluded from the analysis.

OR: Adjusted for age (continuous variable), education (no formal education, primary school, middle school, high school, colleague or above, dummy variables), per capita income (<1000, 1000-2999, 3000-5000 and >5000 RMB Yuan / month, dummy variables), resident site (urban/rural area), family history of type 2 diabetes (yes/no), smoking (ever/never), alcohol drinking (ever/never), regular exercise (never/ever), phase of study (first /second survey); Additionally adjusted for sex (male/female) for all subjects.

1 Table 4. Joint effect of general obesity and central obesity on type 2 diabetes among Chinese adults

| BMI          | WC: Lower       |                    |                | WC: Higher      |                          |                | OR (95%CI) for hypertension |                   | OR (95%CI) for type 2 diabetes |                   |
|--------------|-----------------|--------------------|----------------|-----------------|--------------------------|----------------|-----------------------------|-------------------|--------------------------------|-------------------|
|              | No. of subjects | Hypertension N (%) | Diabetes N (%) | No. of subjects | Hypertension N (%)       | Diabetes N (%) | WC: Lower                   | WC: Higher        | WC: Lower                      | WC: Higher        |
| <b>Men</b>   |                 |                    |                |                 |                          |                |                             |                   |                                |                   |
| <18.5        | 212             | 36                 | 20             | 16              | 10                       | 6              | 0.61(0.42, 0.89)            | 3.68(1.28, 10.59) | 1.02(0.62, 1.67)               | 3.77(1.13, 12.56) |
| 18.5-23.9    | 3034            | 767                | 296            | 679             | 249                      | 111            | 1.00                        | 1.56(0.94, 2.57)  | 1.00                           | 1.48(1.15, 1.90)  |
| 24.0-27.9    | 1010            | 356                | 134            | 2530            | 1179                     | 483            | 1.61(1.13, 2.32)            | 2.38(1.78, 3.17)  | 1.46(1.16, 1.83)               | 1.85(1.16, 2.96)  |
| ≥28.0        | 36              | 20                 | 4              | 960             | 580                      | 224            | 3.91(1.95, 7.82)            | 4.67(3.97, 5.49)  | 1.71(0.55, 5.37)               | 2.60(2.12, 3.18)  |
|              |                 |                    |                |                 | <i>P for interaction</i> |                | 0.0711                      |                   | 0.0933                         |                   |
| <b>Women</b> |                 |                    |                |                 |                          |                |                             |                   |                                |                   |
| <18.5        | 313             | 51                 | 19             | 8               | 2                        | 1              | 0.68(0.49, 0.94)            | 0.85(0.16, 4.51)  | 0.93(0.56, 1.54)               | 2.45(0.22, 26.72) |
| 18.5-23.9    | 4323            | 821                | 265            | 974             | 314                      | 165            | 1.00                        | 1.48(1.26, 1.75)  | 1.00                           | 2.36(1.89, 2.94)  |
| 24.0-27.9    | 1330            | 384                | 93             | 2724            | 1102                     | 437            | 1.84(1.59, 2.14)            | 2.21(1.97, 2.49)  | 1.19(0.92, 1.53)               | 2.14(1.81, 2.54)  |
| ≥28.0        | 81              | 32                 | 9              | 1467            | 815                      | 317            | 3.10(1.93, 5.00)            | 4.33(3.77, 4.96)  | 2.14(1.01, 4.52)               | 3.08(2.56, 3.71)  |
|              |                 |                    |                |                 | <i>P for interaction</i> |                | 0.3524                      |                   | 0.4011                         |                   |
| <b>Total</b> |                 |                    |                |                 |                          |                |                             |                   |                                |                   |
| <18.5        | 525             | 87                 | 39             | 24              | 12                       | 7              | 0.65(0.51, 0.83)            | 2.25(0.85, 5.93)  | 0.97(0.68, 1.39)               | 3.45(1.18, 10.12) |
| 18.5-23.9    | 7357            | 1588               | 561            | 1653            | 563                      | 276            | 1.00                        | 1.52(1.25, 1.85)  | 1.00                           | 1.88(1.42, 2.49)  |
| 24.0-27.9    | 2340            | 740                | 227            | 5254            | 2281                     | 920            | 1.74(1.50, 2.03)            | 2.31(2.03, 2.62)  | 1.33(1.12, 1.58)               | 1.99(1.62, 2.45)  |
| ≥28.0        | 117             | 5                  | 13             | 2427            | 1395                     | 541            | 3.34(2.26, 4.94)            | 4.46(4.02, 4.96)  | 2.00(1.07, 3.74)               | 2.85(2.49, 3.27)  |
|              |                 |                    |                |                 | <i>P for interaction</i> |                | 0.0562                      |                   | 0.0798                         |                   |

2 Higher WC defined as ≥ 85 cm for men and ≥ 80 cm for women

3 OR: Adjusted for age (continuous variable), education (no formal education, primary school, middle school, high school, colleague or above, dummy variables), per capita  
4 income (<1000, 1000-2999, 3000-5000 and >5000 RMB Yuan / month, dummy variables), resident site (urban/rural area), family history of type 2 diabetes (yes/no),  
5 smoking (ever/never), alcohol drinking (ever/never), regular exercise (never/ever), and phase of study (first /second survey).

1  
2  
3  
4  
5  
6  
7  
8  
9  
10  
11  
12  
13  
14  
15  
16  
17  
18  
19  
20  
21  
22  
23  
24  
25  
26  
27  
28  
29  
30  
31  
32  
33  
34  
35  
36  
37  
38  
39  
40  
41  
42  
43  
44  
45  
46  
47  
48  
49

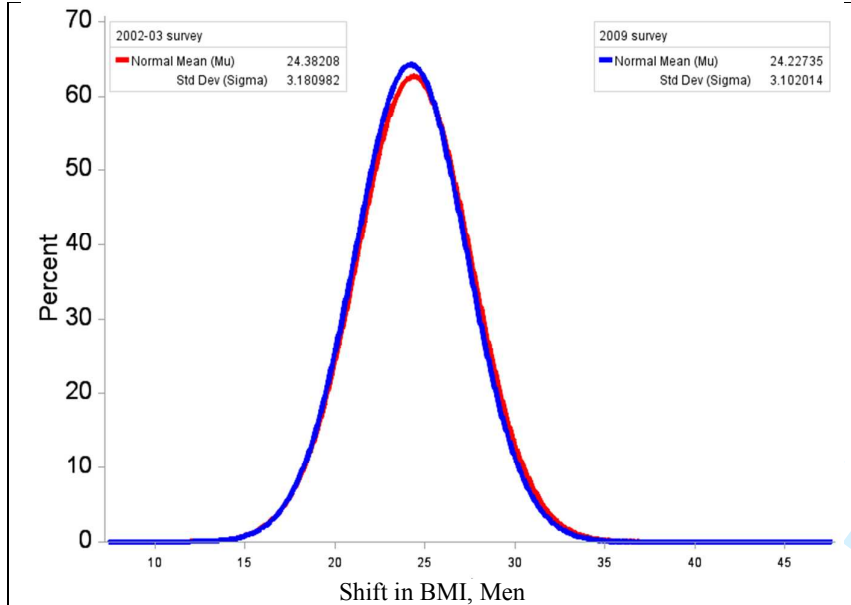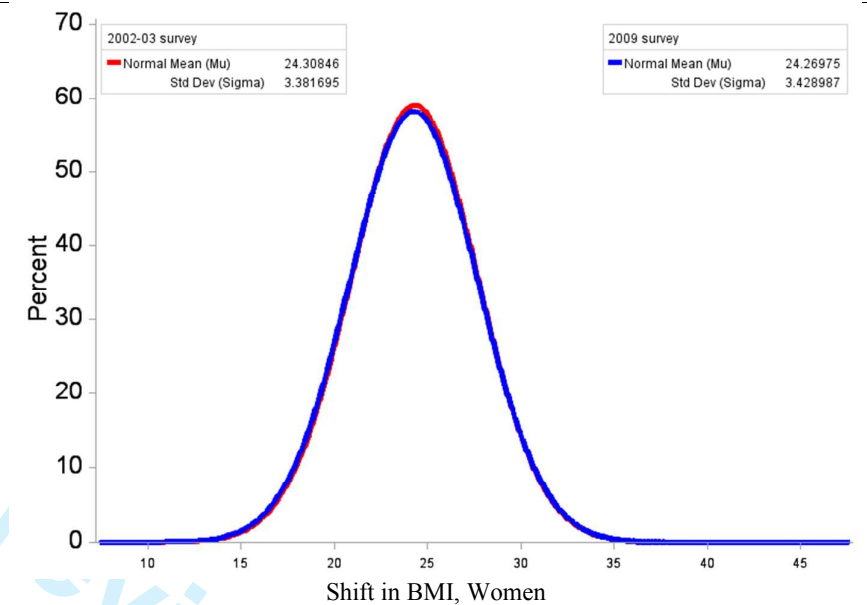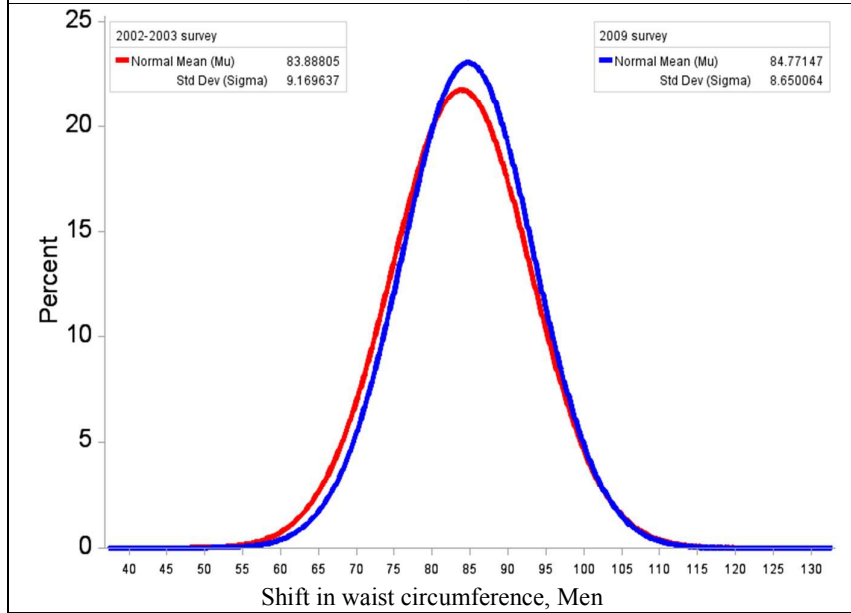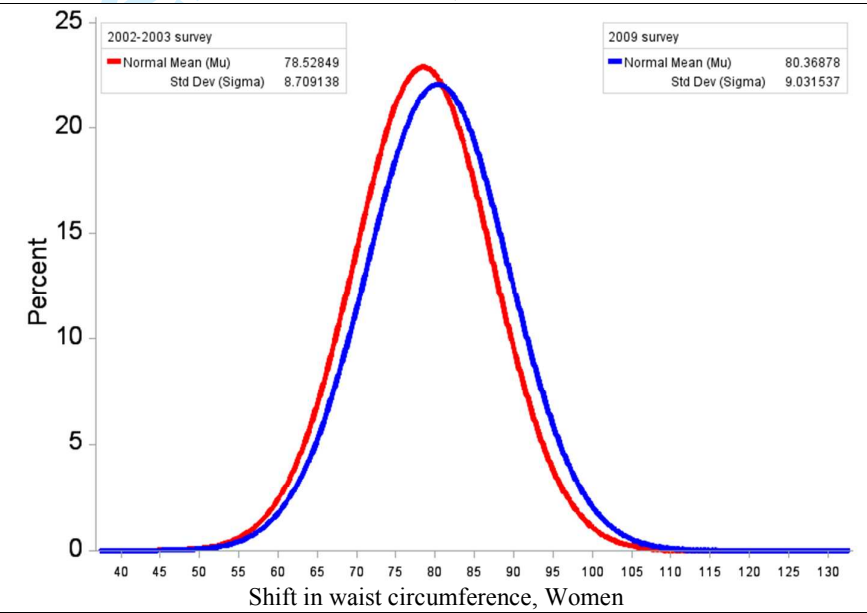

1  
2  
3  
4  
5  
6  
7  
8  
9  
10  
11  
12  
13  
14  
15  
16  
17  
18  
19  
20  
21  
22  
23  
24  
25  
26  
27  
28  
29  
30  
31  
32  
33  
34  
35  
36  
37  
38  
39  
40  
41  
42  
43  
44  
45  
46  
47  
48  
49

Association between body mass index and type 2 diabetes

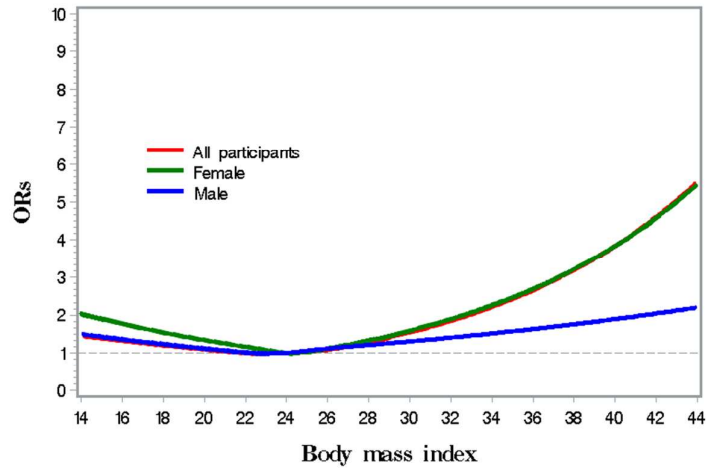

Association between body mass index and hypertension

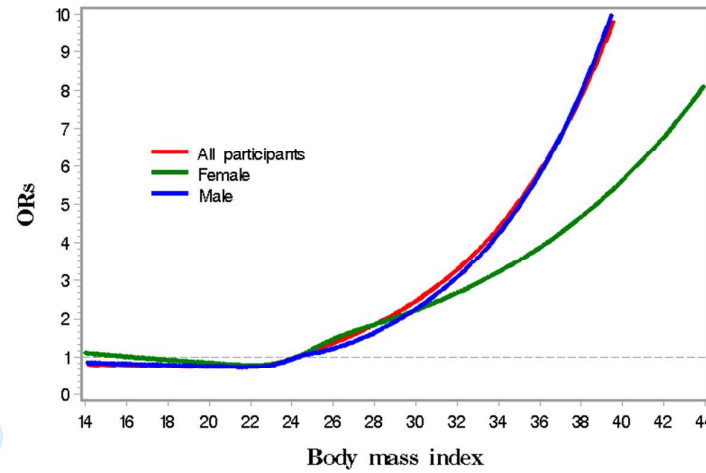

Association between waist circumference and type 2 diabetes

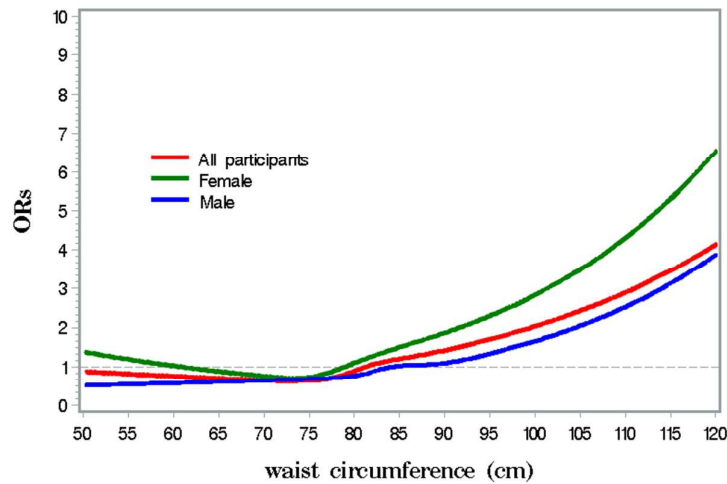

Association between waist circumference and hypertension

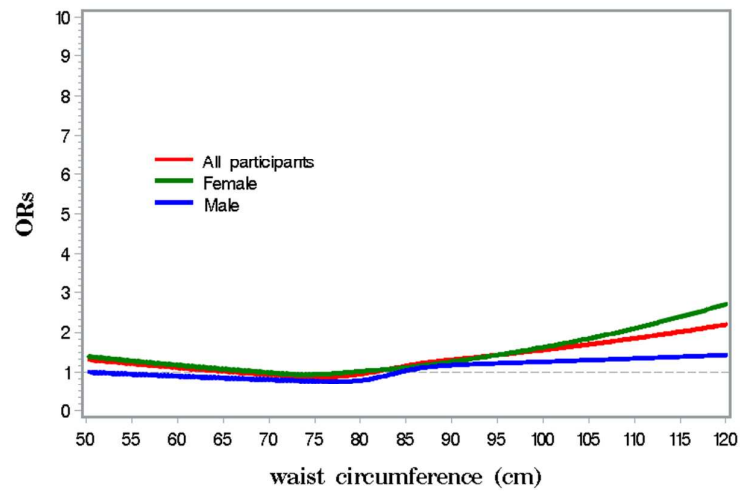

1  
2  
3  
4  
5  
6  
7  
8  
9  
10  
11  
12  
13  
14  
15  
16  
17  
18  
19  
20  
21  
22  
23  
24  
25  
26  
27  
28  
29  
30  
31  
32  
33  
34  
35  
36  
37  
38  
39  
40  
41  
42  
43  
44  
45  
46  
47  
48  
49

For peer review only



STROBE Statement—Checklist of items that should be included in reports of *cross-sectional studies*

|                           | Item No | Recommendation                                                                                                                                                                       | Results of check                                                                                                         |
|---------------------------|---------|--------------------------------------------------------------------------------------------------------------------------------------------------------------------------------------|--------------------------------------------------------------------------------------------------------------------------|
| <b>Title and abstract</b> | 1       | (a) Indicate the study's design with a commonly used term in the title or the abstract                                                                                               | We have indicated that the study was based on two population-based cross-sectional surveys in the title and the abstract |
|                           |         | (b) Provide in the abstract an informative and balanced summary of what was done and what was found                                                                                  | Line 53-62                                                                                                               |
| <b>Introduction</b>       |         |                                                                                                                                                                                      |                                                                                                                          |
| Background/rationale      | 2       | Explain the scientific background and rationale for the investigation being reported                                                                                                 | Line 72-87                                                                                                               |
| Objectives                | 3       | State specific objectives, including any prespecified hypotheses                                                                                                                     | Line 89-92                                                                                                               |
| <b>Methods</b>            |         |                                                                                                                                                                                      |                                                                                                                          |
| Study design              | 4       | Present key elements of study design early in the paper                                                                                                                              | Line 95-104                                                                                                              |
| Setting                   | 5       | Describe the setting, locations, and relevant dates, including periods of recruitment, exposure, follow-up, and data collection                                                      | Line 95-104                                                                                                              |
| Participants              | 6       | (a) Give the eligibility criteria, and the sources and methods of selection of participants                                                                                          | Line 95-104                                                                                                              |
| Variables                 | 7       | Clearly define all outcomes, exposures, predictors, potential confounders, and effect modifiers. Give diagnostic criteria, if applicable                                             | Line 117-153                                                                                                             |
| Data sources/ measurement | 8*      | For each variable of interest, give sources of data and details of methods of assessment (measurement). Describe comparability of assessment methods if there is more than one group | Line 117-153                                                                                                             |
| Bias                      | 9       | Describe any efforts to address potential sources of bias                                                                                                                            | Line 117-153                                                                                                             |
| Study size                | 10      | Explain how the study size was arrived at                                                                                                                                            | NA                                                                                                                       |
| Quantitative variables    | 11      | Explain how quantitative variables were handled in the analyses. If applicable, describe which groupings were chosen and why                                                         | Line 155-169                                                                                                             |
| Statistical methods       | 12      | (a) Describe all statistical methods, including those used to control for confounding                                                                                                | Line 155-169                                                                                                             |
|                           |         | (b) Describe any methods used to                                                                                                                                                     | Line 166-167                                                                                                             |

|                   |     |                                                                                                                                                                                                              |                                                                                      |
|-------------------|-----|--------------------------------------------------------------------------------------------------------------------------------------------------------------------------------------------------------------|--------------------------------------------------------------------------------------|
|                   |     | examine subgroups and interactions                                                                                                                                                                           |                                                                                      |
|                   |     | (c) Explain how missing data were addressed                                                                                                                                                                  | There were very few missing data in this study. Please see footnote of the Table 3   |
|                   |     | (d) If applicable, describe analytical methods taking account of sampling strategy                                                                                                                           |                                                                                      |
|                   |     | (e) Describe any sensitivity analyses                                                                                                                                                                        | No                                                                                   |
| <b>Results</b>    |     |                                                                                                                                                                                                              |                                                                                      |
| Participants      | 13* | (a) Report numbers of individuals at each stage of study—eg numbers potentially eligible, examined for eligibility, confirmed eligible, included in the study, completing follow-up, and analysed            | Line 95-105                                                                          |
|                   |     | (b) Give reasons for non-participation at each stage                                                                                                                                                         | No information                                                                       |
|                   |     | (c) Consider use of a flow diagram                                                                                                                                                                           | No                                                                                   |
| Descriptive data  | 14* | (a) Give characteristics of study participants (eg demographic, clinical, social) and information on exposures and potential confounders                                                                     | Line 172-177, and Table 1                                                            |
|                   |     | (b) Indicate number of participants with missing data for each variable of interest                                                                                                                          | Yes, we provide number of subjects for each variable of interest (Please see tables) |
| Outcome data      | 15* | Report numbers of outcome events or summary measures                                                                                                                                                         | Yes (Please see tables)                                                              |
| Main results      | 16  | (a) Give unadjusted estimates and, if applicable, confounder-adjusted estimates and their precision (eg, 95% confidence interval). Make clear which confounders were adjusted for and why they were included | No. Due to the large table, we present only adjusted ORs                             |
|                   |     | (b) Report category boundaries when continuous variables were categorized                                                                                                                                    | Yes (Please see table 4)                                                             |
|                   |     | (c) If relevant, consider translating estimates of relative risk into absolute risk for a meaningful time period                                                                                             | NA                                                                                   |
| Other analyses    | 17  | Report other analyses done—eg analyses of subgroups and interactions, and sensitivity analyses                                                                                                               | Line 210-217                                                                         |
| <b>Discussion</b> |     |                                                                                                                                                                                                              |                                                                                      |
| Key results       | 18  | Summarise key results with reference to study objectives                                                                                                                                                     | Line 219-224                                                                         |
| Limitations       | 19  | Discuss limitations of the study, taking into account sources of                                                                                                                                             | Line 253-259                                                                         |

|                          |    |                                                                                                                                                                            |              |
|--------------------------|----|----------------------------------------------------------------------------------------------------------------------------------------------------------------------------|--------------|
|                          |    | potential bias or imprecision. Discuss both direction and magnitude of any potential bias                                                                                  |              |
| Interpretation           | 20 | Give a cautious overall interpretation of results considering objectives, limitations, multiplicity of analyses, results from similar studies, and other relevant evidence | Line 251-252 |
| Generalisability         | 21 | Discuss the generalisability (external validity) of the study results                                                                                                      | Line 263-264 |
| <b>Other information</b> |    |                                                                                                                                                                            |              |
| Funding                  | 22 | Give the source of funding and the role of the funders for the present study and, if applicable, for the original study on which the present article is based              | Line 275-280 |

\*Give information separately for exposed and unexposed groups.

**Note:** An Explanation and Elaboration article discusses each checklist item and gives methodological background and published examples of transparent reporting. The STROBE checklist is best used in conjunction with this article (freely available on the Web sites of PLoS Medicine at <http://www.plosmedicine.org/>, Annals of Internal Medicine at <http://www.annals.org/>, and Epidemiology at <http://www.epidem.com/>). Information on the STROBE Initiative is available at [www.strobe-statement.org](http://www.strobe-statement.org).

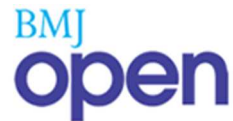

**Increased Waist Circumference and Prevalence of Type 2  
Diabetes and Hypertension in Chinese Adults: Two  
Population-based Cross-sectional Surveys in Shanghai,  
China**



|                                 |                                                                                                                                                                                                                                                                                                                                                                                                                                                                                                                                                                                                                                                                                                                                                                                                                                                                                                                                                                    |
|---------------------------------|--------------------------------------------------------------------------------------------------------------------------------------------------------------------------------------------------------------------------------------------------------------------------------------------------------------------------------------------------------------------------------------------------------------------------------------------------------------------------------------------------------------------------------------------------------------------------------------------------------------------------------------------------------------------------------------------------------------------------------------------------------------------------------------------------------------------------------------------------------------------------------------------------------------------------------------------------------------------|
| Journal:                        | <i>BMJ Open</i>                                                                                                                                                                                                                                                                                                                                                                                                                                                                                                                                                                                                                                                                                                                                                                                                                                                                                                                                                    |
| Manuscript ID:                  | bmjopen-2013-003408.R1                                                                                                                                                                                                                                                                                                                                                                                                                                                                                                                                                                                                                                                                                                                                                                                                                                                                                                                                             |
| Article Type:                   | Research                                                                                                                                                                                                                                                                                                                                                                                                                                                                                                                                                                                                                                                                                                                                                                                                                                                                                                                                                           |
| Date Submitted by the Author:   | 26-Aug-2013                                                                                                                                                                                                                                                                                                                                                                                                                                                                                                                                                                                                                                                                                                                                                                                                                                                                                                                                                        |
| Complete List of Authors:       | Ruan, Ye; Shanghai Municipal Center for Disease Control and Prevention, Department of Diabetes Prevention and Control<br>Mo, Miao; School of Public Health, Fudan University, Department of Epidemiology<br>Joss-Moore, Lisa; University of Utah, Division of Neonatology<br>Li, Yan Yun; Shanghai Municipal Center for Disease Control and Prevention, Department of Diabetes Prevention and Control<br>Yang, Qun Di; Shanghai Municipal Center for Disease Control and Prevention, Department of Diabetes Prevention and Control<br>Shi, Liang; Shanghai Municipal Center for Disease Control and Prevention, Department of Diabetes Prevention and Control<br>Zhang, Hua; School of Public Health, Fudan University, Department of Epidemiology<br>Li, Rui; Shanghai Municipal Center for Disease Control and Prevention, Department of Diabetes Prevention and Control<br>Xu, Wang Hong; Fudan University, Department of Epidemiology, School of Public Health |
| <b>Primary Subject Heading</b>: | Epidemiology                                                                                                                                                                                                                                                                                                                                                                                                                                                                                                                                                                                                                                                                                                                                                                                                                                                                                                                                                       |
| Secondary Subject Heading:      | Epidemiology, Public health                                                                                                                                                                                                                                                                                                                                                                                                                                                                                                                                                                                                                                                                                                                                                                                                                                                                                                                                        |
| Keywords:                       | Hypertension < CARDIOLOGY, General diabetes < DIABETES & ENDOCRINOLOGY, EPIDEMIOLOGY, PUBLIC HEALTH                                                                                                                                                                                                                                                                                                                                                                                                                                                                                                                                                                                                                                                                                                                                                                                                                                                                |
|                                 |                                                                                                                                                                                                                                                                                                                                                                                                                                                                                                                                                                                                                                                                                                                                                                                                                                                                                                                                                                    |

SCHOLARONE™  
Manuscripts

1  
2  
3  
4  
5  
6  
7  
8  
9  
10  
11  
12  
13  
14  
15  
16  
17  
18  
19  
20  
21  
22  
23  
24  
25  
26  
27  
28  
29  
30  
31  
32  
33  
34  
35  
36  
37  
38  
39  
40  
41  
42  
43  
44  
45  
46  
47  
48  
49  
50  
51  
52  
53  
54  
55  
56  
57  
58  
59  
60

1           **Increased Waist Circumference and Prevalence of Type 2 Diabetes and Hypertension in**  
2           **Chinese Adults: Two Population-based Cross-sectional Surveys in Shanghai, China**

3  
4   Ye Ruan, MD, PhD <sup>1</sup>, Miao Mo, MD <sup>2</sup>, Lisa Joss-Moore, PhD <sup>3</sup>, Yan Yun Li, MD <sup>1</sup>, Qun Di Yang,  
5   MD, MPH <sup>1</sup>, Liang Shi, MD <sup>1</sup>, Hua Zhang, MD <sup>2</sup>, Rui Li, MD <sup>1\*</sup>, Wang Hong Xu, MD, PhD <sup>2\*</sup>  
6

7   **AFILIATIONS:**

8   <sup>1</sup> Department of Diabetes Prevention and Control, Shanghai Municipal Center for Disease Control  
9   and Prevention, 1380 Zhong Shan Xi Road, Shanghai, 200336, People's Republic of China

10   <sup>2</sup> Department of Epidemiology, School of Public Health, Fudan University; Key Laboratory of  
11   Public Health Safety, Ministry of Education (Fudan University), 138 Yi Xue Yuan Road, Shanghai,  
12   200032, People's Republic of China

13   <sup>3</sup> Division of Neonatology, University of Utah, Salt Lake City, Utah 84108, USA

14  
15   **Correspondence to:**

16   Wang Hong Xu, MD, Ph.D,

17   Associate professor

18   Department of Epidemiology

19   School of Public Health

20   Fudan University

21   138 Yi Xue Yuan Road

22   Shanghai 200032

23   P. R. China

24   Tel: 86-21-54237679

25   Fax: 86-21-54237334

26   Email: wanghong.xu@fudan.edu.cn

1  
2 27

3  
4 28 or

5  
6 29 Rui Li, MD

7  
8 30 Department of Diabetes Prevention and Control

9  
10 31 Shanghai Municipal Center for Disease Control and Prevention

11  
12 32 1380 Zhong Shan Xi Road

13  
14 33 Shanghai 200336

15  
16 34 P. R. China

17  
18 35 Tel: 86-21-62758710

19  
20 36 Email: rli@scdc.sh.cn

21  
22 37

23  
24  
25  
26 38 **RUNNING HEADER:** Obesity and prevalence of hypertension and T2DM in Chinese adults

27  
28 39

29  
30 40 **Word Count:**

31  
32 41 Abstract: 249

33  
34 42 Text: 2,658

35  
36 43

1  
2  
3  
4  
5  
6  
7  
8  
9  
10  
11  
12  
13  
14  
15  
16  
17  
18  
19  
20  
21  
22  
23  
24  
25  
26  
27  
28  
29  
30  
31  
32  
33  
34  
35  
36  
37  
38  
39  
40  
41  
42  
43  
44  
45  
46  
47  
48  
49  
50  
51  
52  
53  
54  
55  
56  
57  
58  
59  
60

44 **Abstract:**

45 **Objective:** To evaluate the changes in body mass index (BMI) and waist circumference (WC)  
46 and their associations with the prevalence of hypertension and type 2 diabetes (T2DM) in Chinese  
47 adults.

48 **Design:** Two consecutive population-based cross-sectional surveys.

49 **Setting:** A total of 12 districts and 7 counties in Shanghai, China.

50 **Participants:** 12,329 randomly selected participants of the survey in 2002-2003, and 7,423  
51 randomly selected participants of the survey in 2009. All subjects were residents of Shanghai aged  
52 35-74 years old.

53 **Outcome measures:** Measured BMI and WC. Previously-diagnosed and newly-identified  
54 hypertension and T2DM by measured blood pressure, fasting and post-load glucose.

55 **Results:** While the participants of the two surveys were comparable in BMI in each age group,  
56 the participants of the 2009 survey had significantly larger WC than those of the 2002-03 survey,  
57 with an annual percentage change (APC) being higher among subjects aged 45-49 years old in both  
58 men and women. The increase in prevalence of T2DM was observed in all age groups and also  
59 appeared more evident in subjects aged 45-49 years old. The prevalence of hypertension was  
60 observed to increase more rapidly in elderly men and middle-aged women. Obesity, both overt and  
61 central, was associated with the risk of the two diseases, but BMI was more strongly linked to  
62 hypertension while WC appeared more evidently related with T2DM.

63 **Conclusion:** The prevalence of central obesity and related chronic diseases has been  
64 increasing in Shanghai, China. Our findings provide useful information for the projection of  
65 growing burden of T2DM and hypertension in Chinese adults.

66  
67 **Keywords:** type 2 diabetes; hypertension; prevalence; body mass index; waist circumference

68

## Article summary

### Article focus

- The shift in BMI and WC among Chinese adults over past one decade.
- The contribution of changes in overall and central obesity to the increasing burden of chronic disease in China.

### Key messages

- The WC increased in Chinese adults over the decade spanning 2002-2009, while BMI did not change over the same period.
- BMI was more strongly linked to hypertension while WC appeared more evidently related with T2DM in Chinese adults.
- Our findings provide useful information for the projection of a more rapidly growing burden of T2DM than hypertension in Chinese adults.

### Strengths and limitations of this study

- The strengths of this study include the strict process of multistage sampling in adult population of Shanghai, anthropometric measurement according to a standardized protocol and fasting and postprandial blood glucose tests for the participants.
- The nature of the cross-sectional study design limits our ability to directly evaluate the influence of overall and central obesity as well as the change of their prevalence on the risk of hypertension and T2DM.
- The differences in several demographic characteristics between the participants of the two surveys indicate the possibility of selection bias.

69

70



## 71 **Introduction**

72 A rising worldwide prevalence of chronic disease, manifested primarily as hypertension and  
73 type 2 diabetes (T2DM), has been well documented [1-4]. In Chinese aged 15-74 years old, the  
74 prevalence of hypertension increased from 5.11% in 1959, 7.73% in 1979 [5] and 13.58% in 1991[6]  
75 to 17.65% in 2002 [7]. The prevalence of T2DM tripled between 1980 (about 1.0%) and 1996  
76 (3.2%) [8 9], and reached 9.7% in 2008 among adults at 20 years old or above [10]. It is estimated  
77 that over 92 million people in China have T2DM. This represents approximately half of the world's  
78 diabetic population, and places China at the “global epicenter of the diabetes epidemic” [4].

79 Both hypertension and T2DM are associated with obesity [11 12]. Obesity is often measured  
80 by body mass index (BMI). Across the entire range of BMI, the risk of hypertension and T2DM  
81 increases, making a higher BMI a strong predictor of both hypertension and T2DM [4 12-14].  
82 However, a significant proportion of Asian adults diagnosed with T2DM are with the normal BMI,  
83 ie.18.5-25.0 kg/m<sup>2</sup> [15 16]. BMI is a general indicator of overt obesity, but does not give  
84 information about the distribution of obesity. Central obesity, often assessed via waist  
85 circumference (WC), is also strongly correlated with T2DM in both European and Asian adults [11  
86 17]. While changes in BMI have been well documented in China over past several decades [2 18],  
87 changes in WC, and thus central obesity, are not well described.

88 In this study, we took advantage of the data from population based cross-sectional surveys  
89 conducted in Shanghai in 2002-03 and in 2009. We used the data from the two surveys to evaluate  
90 correlations between shifts in BMI and WC with the prevalence of hypertension and T2DM in  
91 Chinese adults. Our results may help to better understand the contribution of overall obesity and  
92 central obesity in the increasing burden of chronic disease in China.

## 93 **Materials and Methods**

### 94 **Study Participants**

95 A representative sample of the general population was randomly selected through a multistage  
96 sampling process in the 2002-03 survey. Firstly, 4 districts and 2 counties were randomly selected

1  
2 97 from a total of 12 districts and 7 counties in Shanghai, China. And then, 1-2 sub-districts or towns  
3  
4 98 were randomly selected from each selected district or county. Next, 1-2 communities or villages,  
5  
6 99 usually 1,000-2,000 residents for each, were randomly selected from each selected sub-district or  
7  
8 100 town. Finally, eligible subjects (permanent residents of Shanghai, 15-74 years old and having been  
9  
10 101 in the city for at least 5 years) were randomly selected from the selected communities and villages  
11  
12 102 and were invited for participation. Pregnant women, individuals with type I diabetes, and physically  
13  
14 103 or mentally disabled persons were excluded from the participation. During the period of May  
15  
16 104 2002-October 2003, a total of 17,526 eligible subjects were recruited, and 14,401 (82.17%)  
17  
18 105 participated the survey.

21 106 The 2009 survey used the similar sampling method except that only 7 communities and  
22  
23 107 villages were randomly selected in the third stage of sampling. The inclusion and exclusion criteria  
24  
25 108 of the 2009 survey were also similar to those for the 2002-03 survey, except that only those at the  
26  
27 109 age of 35-74 years old were eligible for the 2009 survey. Among 7,627 eligible adults contacted  
28  
29 110 during the period of May-July 2009, 7,414 (97.21%) were interviewed and donated blood samples.

32 111 To make the two surveys comparable, we excluded 1,071 subjects younger than 35 years from  
33  
34 112 the 2002-03 survey. After further excluding subjects with missing information, the final analysis  
35  
36 113 included 5,050 men and 7,279 women in the 2002-03 survey and 3,461 men and 3,962 women in  
37  
38 114 the 2009 survey. The Institutional Review Board at Shanghai Municipal Center of Disease Control  
39  
40 115 and Prevention approved the study. Informed consent was obtained from each participant before  
41  
42 116 data collection.

#### 46 117 **Data Collection**

48 118 A similar survey approach was followed by the two investigations. In both surveys,  
49  
50 119 information on demographic and socioeconomic factors, diagnosis of diabetes, tobacco and alcohol  
51  
52 120 use, physical activity and family history of diabetes was collected by trained interviewers with a  
53  
54 121 structured questionnaire at community clinics located in the residential areas of the participants.

56 122 At the interview, each participant's blood pressure, body weight, standing height, and waist

1  
2 123 circumference (WC) were measured by trained staff. Blood pressure was measured on the right arm  
3  
4 124 in the sitting position using standard mercury sphygmomanometer after at least 5 minutes of rest.  
5  
6 125 The first and fifth Korotkoff sounds were recorded. Body weight and height were recorded while  
7  
8 126 the subject was in light clothing and without shoes. Body weight was measured with electronic  
9  
10 127 scales to the nearest 0.1 kg. Body height was measured to the nearest 0.1 cm by using a stadiometer.  
11  
12 128 WC, recorded to the nearest 0.1 cm, was taken with a cloth tape and was measured on bare skin at  
13  
14 129 the midline between the lower border of the ribs and the iliac crest in the horizontal plane after a  
15  
16 130 normal expiration. Two measurements were taken and the mean of the replicates was used in the  
17  
18 131 following analyses. Body mass index (BMI) was calculated as weight in kilograms divided by  
19  
20 132 height in meters squared ( $\text{kg/m}^2$ ) using the direct measurements.  
21  
22  
23

### 24 133 **Laboratory Measurements**

25  
26 134 After at least 10 hours of overnight fasting, 1-1.5 ml venous blood specimen was collected in a  
27  
28 135 vacuum tube containing sodium fluoride. All participants with no history of diabetes and having a  
29  
30 136 fasting plasma glucose level of  $< 7.0$  mmol per liter (mmol/l) were then asked to have an oral  
31  
32 137 glucose-tolerance test (OGTT). Blood samples were drawn at 0 and 120 minutes after a standard 75  
33  
34 138 gram glucose load. Plasma glucose was measured with Glucose oxidase-peroxidase (GOD-PAP)  
35  
36 139 method.  
37  
38

### 39 140 **Diagnosis of T2DM and Hypertension**

40  
41 141 Previously diagnosed T2DM and hypertension was identified by a positive response from the  
42  
43 142 participant to the question of “Have you ever diagnosed with T2DM/hypertension by a doctor?” and  
44  
45 143 confirmed by medical records in which prescriptions of anti-hypertensive or hypoglycemic  
46  
47 144 medications were presented. The consistent rate was 100%. For those who had a negative response,  
48  
49 145 the T2DM was diagnosed with measured glucose level by using the 1999 World Health  
50  
51 146 Organization diagnostic criteria [Department of Noncommunicable Disease Surveillance. Definition,  
52  
53 147 diagnosis and classification of diabetes mellitus and its complications: report of a WHO  
54  
55 148 consultation. Part 1. Diagnosis and classification of diabetes mellitus. Geneva: World Health  
56  
57  
58  
59  
60

1  
2 149 Organization, 1999. (Accessed July 5, 2010, at\_  
3  
4 150 [http://www.staff.ncl.ac.uk/philip.home/who\\_dmg.pdf](http://www.staff.ncl.ac.uk/philip.home/who_dmg.pdf).)] and hypertension referred to the subjects  
5  
6 151 with measured systolic blood pressure (SBP)  $\geq$  140 mmHg or diastolic blood pressure (DBP)  $\geq$  90  
7  
8 152 mmHg and confirmed by clinical visits. Total T2DM and hypertension included both previously  
9  
10 153 diagnosed and newly-diagnosed patients. 42.7% (1,110 of 2,598) diabetic patients and 10.3% (694  
11  
12 154 of 6,735) hypertensive patients were newly-diagnosed in the two surveys.

### 155 **Statistical Analysis**

156 SAS software 9.2 was used for all the statistical analyses. Characteristics of the subgroups  
157 were described using summary statistics (median, 25<sup>th</sup> and 75<sup>th</sup> percentile, frequencies, and  
158 percentages) separately for men and women. The differences between two surveys were compared  
159 using  $\chi^2$  test (category variables) and Wilcoxon tests (continuous variables). The annual percentage  
160 changes (APC) in prevalence between two surveys were calculated as (prevalence in 2009 –  
161 prevalence in 2002-03) / number of years using logarithms for each age group. Percentile curves  
162 were constructed for BMI and WC values in the two surveys by gender using the LMS (lambda, mu,  
163 sigma) method. Restricted cubic splines (RCS) were used to model a potential curvilinear  
164 relationship of BMI and WC with hypertension and diabetes using the 5<sup>th</sup>, 25<sup>th</sup>, 75<sup>th</sup> and 95<sup>th</sup>  
165 percentiles as fixed knots and the 50<sup>th</sup> percentile as the reference. Polynomial logistic regression  
166 were used to estimate the odds ratios (OR) and 95% confidence intervals (95% CI) of BMI and WC  
167 with T2DM and hypertension. Meta-analysis was applied to obtain the combined ORs and 95% CI  
168 considering the potential heterogeneity of the populations in the two surveys. The residual method  
169 was used to derive the independent effect of BMI and WC with each other in the models. *P* value  
170 less than 0.05 was considered as a test of significance based on two sides.

### 171 **Results**

172 The male participants in two surveys were similar in age, resident site and cigarette smoking  
173 while the females were comparable in cigarette smoking ( $P > 0.05$ ) (Table 1). Compared to the  
174 subjects in 2002-03 survey, the participants of 2009 survey, both men and women, had lower level

1  
2 175 of education, higher level of income per capita, more prior history of T2DM, higher frequency of  
3  
4 176 alcohol drinking and lower frequency of leisure time activity, and were more likely to have a family  
5  
6 177 history of diabetes.  
7

8  
9 178 Figure 1 shows the shapes of the BMI and WC distribution curves among men and women  
10  
11 179 changed over the period of the two surveys. After adjusting for age, education, per capita income,  
12  
13 180 resident site, smoking, drinking, regular exercise, and family history of T2DM, the curves of BMI  
14  
15 181 were almost overlapped in both men and women. However, the WC curves for men and women  
16  
17 182 were shifted to the right between 2002-03 and 2009, with the mean WC increasing from 83.6 to  
18  
19 183 85.3 cm for men and from 78.4 to 80.6 cm for women.  
20

21  
22 184 As presented in table 2, the prevalence of obesity, both overall and central, increased with  
23  
24 185 increasing age groups. While the prevalence of overall obesity ( $BMI \geq 28 \text{ kg/m}^2$ ) did not changed  
25  
26 186 between two surveys (all  $P$  values  $> 0.05$ ), the prevalence of central obesity were significantly  
27  
28 187 higher in 2009 survey in each age group (all  $P$  values  $< 0.001$ ). A more pronounced increase in  
29  
30 188 prevalence of central obesity and T2DM was observed among subjects aged 45-49 years old in both  
31  
32 189 men and women; whereas the change in prevalence of hypertension between two surveys appeared  
33  
34 190 more evident in older men and younger women over the period. Using the World Health  
35  
36 191 Organization (WHO) criteria for obesity did not change the results substantially (data not shown in  
37  
38 192 the tables).  
39  
40

41  
42 193 BMI and WC were highly correlated with each other, with a correlation coefficient of 0.77 ( $P <$   
43  
44 194 0.0001) among men and 0.78 ( $P < 0.0001$ ) among women after adjusting for age. Therefore, the  
45  
46 195 residual method was used to test the potential respective non-linear relationships of BMI and WC  
47  
48 196 with the risk of T2DM and hypertension (Figure 2). The dose-response analysis likewise showed a  
49  
50 197 statistically significant increased risk of T2DM at high level of WC and a significant elevated risk  
51  
52 198 of hypertension at high level of BMI in both men and women after adjusting for age, education, per  
53  
54 199 capita income, resident site, smoking, drinking, regular exercise, family history of T2DM and phase  
55  
56 200 of surveys, with  $P$  values for non-linear relationship tests  $< 0.05$ . No significant relationship was  
57  
58  
59  
60

1  
2 201 observed between BMI and T2DM in men and between WC and hypertension in women.

3  
4 202 As shown in table 3, in both sexes, BMI adjusted for WC (residuals) appeared more strongly  
5  
6 203 associated with hypertension while WC adjusted for BMI (residuals) was more evidently related  
7  
8 204 with T2DM. Comparing with the lowest quartile of BMI residuals, the risk of hypertension  
9  
10 205 increased 85% (95%CI: 1.59-2.15) in men and 1.23-fold (95%CI: 1.94-2.57) in women, whereas  
11  
12 206 the risk of T2DM did not increase significantly in both sexes. On the other hand, the ORs of the  
13  
14 207 highest versus the lowest quartile WC residuals for T2DM were 1.75 (95%CI: 1.33-2.30) in men  
15  
16  
17 208 and 2.37 (95%CI: 1.78-3.15) in women, higher than the OR of 1.57 (95%CI: 1.35-1.82) in men and  
18  
19 209 1.13 (95%CI: 0.98-1.30) in women for hypertension.

20  
21 210 We further evaluated the potential joint effect of BMI and WC on T2DM and hypertension  
22  
23 211 (table 4). The participants were classified into normal weight (BMI 18.5-23.9 kg/m<sup>2</sup>), overweight  
24  
25 212 (24.0-27.9 kg/m<sup>2</sup>), or obese ( $\geq 28$  kg/m<sup>2</sup>) based on data from Chinese adults, and were defined as  
26  
27 213 with normal or increased WC using sex-specific cut-offs (85 cm in men and 80 cm in women) [19].  
28  
29 214 The risk of T2DM and hypertension increased across groups defined by BMI and WC, with the  
30  
31 215 highest risk observed among men with the lowest BMI but a higher WC, and among those with the  
32  
33 216 highest BMI and a higher WC for hypertension. However, no significant interaction was observed  
34  
35 217 between BMI and WC (all *P* values for interaction tests  $> 0.05$ ).

## 36 37 38 39 40 218 **Discussion**

41  
42 219 In this representative sample of the adult population in Shanghai, the largest city in China, we  
43  
44 220 observed an increased prevalence of central obesity, hypertension and T2DM over the decade  
45  
46 221 spanning 2002-2009. In contrast, BMI did not change over the same period. Our results present a  
47  
48 222 snapshot of overt versus central obesity in the Chinese population and suggest that the epidemic of  
49  
50 223 central obesity in this population, which has been more closely associated with the prevalence of  
51  
52 224 T2DM, may lead to a more rapidly growing burden of T2DM in China.

53  
54  
55 225 Chinese adults have lower rates of overweight and obesity than their Western counterparts  
56  
57 226 using the WHO criteria (BMI  $\geq 25$  kg/m<sup>2</sup> for overweight and BMI  $\geq 30$  kg/m<sup>2</sup> for obesity) [15 16].  
58  
59  
60

1  
2 227 Nevertheless, increasing trends of BMI in Chinese adults have been well documented [18 20]. In  
3  
4 228 two national nutritional surveys undertaken in 1982 and 1992 in China, the prevalence of  
5  
6 229 overweight/obesity ( $\text{BMI} \geq 25 \text{ kg/m}^2$ ) in subjects 20-70 years of age was 10% and 15%,  
7  
8 230 respectively. Between 1992 and 2002, the combined prevalence of overweight and obesity increased  
9  
10 231 from 14.6 to 21.8% [21]. Interestingly, the increase in BMI among Chinese adults has slowed down  
11  
12 232 during past decades [2]. In this study, we did not observe an increase in BMI and prevalence of  
13  
14 233 obesity defined by the Chinese obesity standards or by WHO criteria (data not shown). Instead, we  
15  
16 234 observed a significant increase in WC, a measure of central obesity between surveys. Our  
17  
18 235 observation of increased WC in Chinese adults, without a concomitant increase in BMI, represents  
19  
20 236 an increasing burden of central obesity in this population. The increase in central obesity indicates  
21  
22 237 an upward trend in body fat percentages in the population who have been previously observed with  
23  
24 238 higher body fat percentages compared to other ethnic people with the same BMI [22 23].  
25  
26  
27

28 239 Both epidemic of overall and central obesity parallels a continuously increasing prevalence of  
29  
30 240 hypertension and T2DM in China [21]. Several studies indicate that overall obesity (BMI) is more  
31  
32 241 strongly associated with hypertension, while central obesity (WC) is more strongly associated with  
33  
34 242 T2DM [17 24-26]. The rationale for these associations is based on the notion that central obesity  
35  
36 243 reflects specific accumulation of visceral adipose tissue. Excess visceral adipose tissue is  
37  
38 244 metabolically unfavorable due to productions of free fatty acids and inflammatory mediators.  
39  
40 245 Overall obesity, on the other hand, represents a greater overall physiologic strain and effects  
41  
42 246 vascular and cardiac parameters more significantly. In this study, we observed a significant increase  
43  
44 247 in prevalence of T2DM regardless of gender or age groups, which was more pronounced than the  
45  
46 248 change in the prevalence of hypertension during the period of 2002-03 and 2009. We also observed  
47  
48 249 a closer association of central obesity with the prevalence of T2DM than with the prevalence of  
49  
50 250 hypertension. These results support the notion that central obesity in particular is a stronger risk  
51  
52 251 factor for T2DM than for hypertension in Chinese adults. Due to the cross-sectional design,  
53  
54 252 however, our study was unable to make a causal inference.  
55  
56  
57  
58  
59  
60

1  
2 253 The nature of the cross-sectional study design limits our ability to directly evaluate the  
3  
4 254 influence of overall and central obesity as well as the change of their prevalence on the risk of  
5  
6 255 hypertension and T2DM. The differences in several demographic characteristics between the  
7  
8 256 participants of the two surveys indicate the changes in general population over time. However,  
9  
10 257 selection bias could not be excluded. However, there are several strengths, including the strict  
11  
12 258 process of multistage sampling in adult population in Shanghai, anthropometric measurement  
13  
14 259 according to a standardized protocol and fasting and postprandial blood glucose tests for the  
15  
16 260 participants.

## 20 261 **Conclusions**

22 262 In summary, this study describes the potential association of central obesity with an upward  
23  
24 263 trend of T2DM, implicating a more rapidly growing burden of T2DM than hypertension in Chinese  
25  
26 264 adults. The findings in Shanghai, the largest city and one of the most economically developed areas  
27  
28 265 in China, provide useful information for the projection of future trends in the whole country.

## 32 266 **Acknowledgements**

34 267 We thank Dr. Xiao-ou Shu and Dr. Hui Cai of Vanderbilt University for their contributions in  
35  
36 268 study design and data analysis. The authors thank the study participants of the two cross-sectional  
37  
38 269 surveys and the healthcare workers in each community involved.

## 42 270 **Footnotes**

---

44 271 **Contributors** YR and MM contributed to data collection, data analysis and draft of the paper.  
45  
46 272 YR, YYL, QDY, and LS contributed to data collection and quality control. LJM contributed to  
47  
48 273 revision of the paper. HZ contributed to data clean and analysis. RL and WHX contributed to study  
49  
50 274 design, statistical analysis and revision of the paper. All authors contributed to the interpretation of  
51  
52 275 data and revision of the manuscript. All authors approved the final version.

55 276 **Funding** This study was supported by the Key Program of Shanghai Municipal Committee of  
56  
57 277 Science and Technology (04 DZ19502), the Shanghai Medical Development Program (01ZD001)



1  
2 278 and the Shanghai Municipal Health Bureau (GWDTR201204). W. H. Xu was supported by a  
3  
4 279 training grant from the Fogarty International Center (D43 TW008313 to X. O. Shu). The funders  
5  
6 280 had no role in study design, data collection or analysis, decision to publish, or preparation of the  
7  
8 281 manuscript.  
9

10 282 **Conflict of Interest:** None declared.  
11

12 283 **Data sharing:** No additional unpublished data.  
13  
14  
15  
16  
17  
18  
19  
20  
21  
22  
23  
24  
25  
26  
27  
28  
29  
30  
31  
32  
33  
34  
35  
36  
37  
38  
39  
40  
41  
42  
43  
44  
45  
46  
47  
48  
49  
50  
51  
52  
53  
54  
55  
56  
57  
58  
59  
60

## 284 REFERENCES

- 285 1. Kelly T, Yang W, Chen CS, Reynolds K, He J. Global burden of obesity in 2005 and projections to 2030. *Int J Obes*  
286 (Lond) 2008;**32**(9):1431-7 doi: ijo2008102 [pii]  
287 10.1038/ijo.2008.102[published Online First: Epub Date].
- 288 2. Popkin BM. Recent dynamics suggest selected countries catching up to US obesity. *Am J Clin Nutr*  
289 2010;**91**(1):284S-88S doi: ajcn.2009.28473C [pii]  
290 10.3945/ajcn.2009.28473C[published Online First: Epub Date].
- 291 3. Shaw JE, Sicree RA, Zimmet PZ. Global estimates of the prevalence of diabetes for 2010 and 2030. *Diabetes Res*  
292 *Clin Pract* 2010;**87**(1):4-14 doi: S0168-8227(09)00432-X [pii]  
293 10.1016/j.diabres.2009.10.007[published Online First: Epub Date].
- 294 4. Hu FB. Globalization of diabetes: the role of diet, lifestyle, and genes. *Diabetes care* 2011;**34**(6):1249-57 doi:  
295 10.2337/dc11-0442[published Online First: Epub Date].
- 296 5. Wu YK, Lu CQ, Gao RC, Yu JS, Liu GC. Nation-wide hypertension screening in China during 1979-1980. *Chin Med*  
297 *J (Engl)* 1982;**95**(2):101-8
- 298 6. Wu X, Duan X, Gu D, Hao J, Tao S, Fan D. Prevalence of hypertension and its trends in Chinese populations. *Int J*  
299 *Cardiol* 1995;**52**(1):39-44 doi: 016752739502443Z [pii][published Online First: Epub Date].
- 300 7. Wu Y, Huxley R, Li L, et al. Prevalence, awareness, treatment, and control of hypertension in China: data from the  
301 China National Nutrition and Health Survey 2002. *Circulation* 2008;**118**(25):2679-86 doi:  
302 10.1161/CIRCULATIONAHA.108.788166  
303 118/25/2679 [pii][published Online First: Epub Date].
- 304 8. [A mass survey of diabetes mellitus in a population of 300,000 in 14 provinces and municipalities in China (author's  
305 transl)]. *Zhonghua Nei Ke Za Zhi* 1981;**20**(11):678-83
- 306 9. Wang K, Li T, Xiang H. [Study on the epidemiological characteristics of diabetes mellitus and IGT in China].  
307 *Zhonghua Liu Xing Bing Xue Za Zhi* 1998;**19**(5):282-5
- 308 10. Yang W, Lu J, Weng J, et al. Prevalence of diabetes among men and women in China. *The New England journal of*  
309 *medicine* 2010;**362**(12):1090-101 doi: 10.1056/NEJMoa0908292[published Online First: Epub Date].
- 310 11. Nyamdorj R, Qiao Q, Lam TH, et al. BMI compared with central obesity indicators in relation to diabetes and  
311 hypertension in Asians. *Obesity (Silver Spring)* 2008;**16**(7):1622-35 doi: 10.1038/oby.2008.73  
312 oby200873 [pii][published Online First: Epub Date].
- 313 12. Ostchega Y, Hughes JP, Terry A, Fakhouri TH, Miller I. Abdominal obesity, body mass index, and hypertension in  
314 US adults: NHANES 2007-2010. *Am J Hypertens* 2012;**25**(12):1271-8 doi: 10.1038/ajh.2012.120  
315 ajh2012120 [pii][published Online First: Epub Date].
- 316 13. Barrett-Connor E. Epidemiology, obesity, and non-insulin-dependent diabetes mellitus. *Epidemiol Rev*  
317 1989;**11**:172-81
- 318 14. Weber MB, Oza-Frank R, Staimetz LR, Ali MK, Narayan KM. Type 2 diabetes in Asians: prevalence, risk factors,  
319 and effectiveness of behavioral intervention at individual and population levels. *Annu Rev Nutr*  
320 2012;**32**:417-39 doi: 10.1146/annurev-nutr-071811-150630[published Online First: Epub Date].
- 321 15. Lu B, Yang Y, Song X, et al. An evaluation of the International Diabetes Federation definition of metabolic  
322 syndrome in Chinese patients older than 30 years and diagnosed with type 2 diabetes mellitus. *Metabolism*  
323 2006;**55**(8):1088-96 doi: S0026-0495(06)00138-7 [pii]  
324 10.1016/j.metabol.2006.04.003[published Online First: Epub Date].
- 325 16. Tseng CH. Body mass index and waist circumference as determinants of coronary artery disease in Taiwanese adults  
326 with type 2 diabetes mellitus. *Int J Obes (Lond)* 2006;**30**(5):816-21 doi: 0803218 [pii]  
327 10.1038/sj.ijo.0803218[published Online First: Epub Date].
- 328 17. Feng RN, Zhao C, Wang C, et al. BMI is strongly associated with hypertension, and waist circumference is strongly  
329 associated with type 2 diabetes and dyslipidemia, in northern Chinese adults. *Journal of epidemiology / Japan*

- 1  
2 330 Epidemiological Association 2012;**22**(4):317-23
- 3 331 18. Wildman RP, Gu D, Muntner P, et al. Trends in overweight and obesity in Chinese adults: between 1991 and  
4 332 1999-2000. *Obesity (Silver Spring)* 2008;**16**(6):1448-53 doi: oby2008208 [pii]  
5 333 10.1038/oby.2008.208[published Online First: Epub Date]].  
6 334 19. Zhou BF. Predictive values of body mass index and waist circumference for risk factors of certain related diseases in  
7 335 Chinese adults--study on optimal cut-off points of body mass index and waist circumference in Chinese adults.  
8 336 *Biomed Environ Sci* 2002;**15**(1):83-96
- 9 337 20. Wang H, Du S, Zhai F, Popkin BM. Trends in the distribution of body mass index among Chinese adults, aged 20-45  
10 338 years (1989-2000). *Int J Obes (Lond)* 2007;**31**(2):272-8 doi: 0803416 [pii]  
11 339 10.1038/sj.ijo.0803416[published Online First: Epub Date]].  
12 340 21. Wang Y, Mi J, Shan XY, Wang QJ, Ge KY. Is China facing an obesity epidemic and the consequences? The trends in  
13 341 obesity and chronic disease in China. *Int J Obes (Lond)* 2007;**31**(1):177-88 doi: 0803354 [pii]  
14 342 10.1038/sj.ijo.0803354[published Online First: Epub Date]].  
15 343 22. Wang J, Thornton JC, Burastero S, et al. Comparisons for body mass index and body fat percent among Puerto  
16 344 Ricans, blacks, whites and Asians living in the New York City area. *Obes Res* 1996;**4**(4):377-84
- 17 345 23. Araneta MR, Wingard DL, Barrett-Connor E. Type 2 diabetes and metabolic syndrome in Filipina-American  
18 346 women : a high-risk nonobese population. *Diabetes Care* 2002;**25**(3):494-9
- 19 347 24. Jacobs EJ, Newton CC, Wang Y, et al. Waist circumference and all-cause mortality in a large US cohort. *Archives of*  
20 348 *internal medicine* 2010;**170**(15):1293-301 doi: 10.1001/archinternmed.2010.201[published Online First: Epub  
21 349 Date]].  
22 350 25. InterAct C, Langenberg C, Sharp SJ, et al. Long-term risk of incident type 2 diabetes and measures of overall and  
23 351 regional obesity: the EPIC-InterAct case-cohort study. *PLoS medicine* 2012;**9**(6):e1001230 doi:  
24 352 10.1371/journal.pmed.1001230[published Online First: Epub Date]].  
25 353 26. Li R, Shi L, Jia J, et al. Differentiating the Associations of Waist Circumference and Body Mass Index With  
26 354 Cardiovascular Disease Risk in a Chinese Population. *Asia-Pacific journal of public health / Asia-Pacific*  
27 355 *Academic Consortium for Public Health* 2012 doi: 10.1177/1010539512465306[published Online First: Epub  
28 356 Date]].  
29 357  
30 358

1  
2 359 Figure 1. Shift in BMI and WC over the period of the two population-based surveys

3  
4 360 Figure 2. Non-linear dose-response relationship of BMI and WC with hypertension and T2DM

5  
6 361 among participants of the two population-based surveys

7  
8 362  
9  
10  
11  
12  
13  
14  
15  
16  
17  
18  
19  
20  
21  
22  
23  
24  
25  
26  
27  
28  
29  
30  
31  
32  
33  
34  
35  
36  
37  
38  
39  
40  
41  
42  
43  
44  
45  
46  
47  
48  
49  
50  
51  
52  
53  
54  
55  
56  
57  
58  
59  
60

For peer review only

363 Table 1. Characteristics of participants in two population-based surveys in Shanghai, China

| Characteristics                  | 1 <sup>st</sup> survey |                    | 2 <sup>nd</sup> survey |                    | <i>P-value between surveys<sup>a</sup></i> |                 |
|----------------------------------|------------------------|--------------------|------------------------|--------------------|--------------------------------------------|-----------------|
|                                  | Men<br>(N=5,050)       | Women<br>(N=7,279) | Men<br>(N=3,461)       | Women<br>(N=3,962) | <i>In men</i>                              | <i>In women</i> |
| Age (yrs., mean ± SD)            | 54.8 ± 10.8            | 53.1 ± 10.3        | 54.7 ± 9.5             | 54.7 ± 9.1         | 0.55                                       | <0.0001         |
| Resident site (%)                |                        |                    |                        |                    |                                            |                 |
| Urban                            | 71.1                   | 63.0               | 72.4                   | 72.0               |                                            |                 |
| Rural                            | 29.0                   | 37.0               | 27.7                   | 28.0               | 0.19                                       | <0.0001         |
| Education (%)                    |                        |                    |                        |                    |                                            |                 |
| No formal education              | 4.1                    | 18.4               | 3.2                    | 9.5                |                                            |                 |
| Primary school                   | 18.2                   | 23.0               | 14.7                   | 17.7               |                                            |                 |
| Middle school                    | 35.3                   | 31.1               | 45.7                   | 45.2               |                                            |                 |
| High school                      | 27.6                   | 22.6               | 27.6                   | 23.8               |                                            |                 |
| College or above                 | 14.8                   | 4.9                | 8.8                    | 3.9                | 0.0025                                     | <0.0001         |
| Per capita income (yuan/mo.) (%) |                        |                    |                        |                    |                                            |                 |
| <1000                            | 37.0                   | 45.5               | 4.9                    | 4.0                |                                            |                 |
| 1000-2999                        | 38.3                   | 38.4               | 41.8                   | 46.7               |                                            |                 |
| 3000-5000                        | 22.5                   | 17.9               | 33.2                   | 33.3               |                                            |                 |
| >5000                            | 2.2                    | 1.3                | 20.0                   | 16.0               | <0.0001                                    | <0.0001         |
| Family history of type 2diabetes | 12.3                   | 13.1               | 16.4                   | 19.0               | <0.0001                                    | <0.0001         |
| Prevalence of type 2diabetes (%) | 13.6                   | 10.3               | 17.4                   | 14.1               | <0.0001                                    | <0.0001         |
| Prevalence of hypertension (%)   | 34.8                   | 28.3               | 41.8                   | 37.1               | <0.0001                                    | <0.0001         |
| Cigarette smoking (%)            | 61.4                   | 1.7                | 62.6                   | 1.8                | 0.22                                       | 0.93            |
| Alcohol drinking (%)             | 40.4                   | 2.4                | 54.0                   | 5.0                | <0.0001                                    | <0.0001         |
| Leisure-time activity (%)        | 13.3                   | 13.1               | 10.8                   | 9.0                | 0.0009                                     | <0.0001         |

364 <sup>a</sup> *P* for Wilcoxon tests or chi-square tests

Table 2. Prevalence of obesity, hypertension and type 2 diabetes in participants of the two population-based surveys by age groups in Shanghai, China

|                         | No. of subjects        |                        | Overall Obesity        |                        | APC   | Central obesity        |                        | APC  | Hypertension           |                        | APC   | Type 2 diabetes        |                        | APC   |
|-------------------------|------------------------|------------------------|------------------------|------------------------|-------|------------------------|------------------------|------|------------------------|------------------------|-------|------------------------|------------------------|-------|
|                         | 1 <sup>st</sup> survey | 2 <sup>nd</sup> survey | 1 <sup>st</sup> survey | 2 <sup>nd</sup> survey | (%)   | 1 <sup>st</sup> survey | 2 <sup>nd</sup> survey | (%)  | 1 <sup>st</sup> survey | 2 <sup>nd</sup> survey | (%)   | 1 <sup>st</sup> survey | 2 <sup>nd</sup> survey | (%)   |
| Men                     |                        |                        |                        |                        |       |                        |                        |      |                        |                        |       |                        |                        |       |
| Overall                 | 5050                   | 3461                   | 11.7                   | 11.9                   | 0.21  | 46.3                   | 53.8                   | 2.35 | 34.8                   | 41.8                   | 2.87  | 13.6                   | 17.4                   | 3.78  |
| Age-groups              |                        |                        |                        |                        |       |                        |                        |      |                        |                        |       |                        |                        |       |
| 35-                     | 414                    | 230                    | 10.5                   | 9.1                    | -2.11 | 41.8                   | 45.2                   | 1.22 | 15.2                   | 11.7                   | -3.92 | 4.6                    | 5.7                    | 3.25  |
| 40-                     | 574                    | 302                    | 10.0                   | 8.3                    | -2.83 | 41.8                   | 47.00                  | 1.85 | 22.5                   | 21.9                   | -0.43 | 7.8                    | 7.6                    | -0.44 |
| 45-                     | 837                    | 445                    | 12.6                   | 12.6                   | -0.04 | 44.0                   | 53.7                   | 3.12 | 25.3                   | 31.0                   | 3.16  | 7.8                    | 13.7                   | 9.13  |
| 50-                     | 833                    | 739                    | 12.2                   | 10.8                   | -1.76 | 44.1                   | 53.8                   | 3.12 | 33.1                   | 40.3                   | 3.07  | 12.7                   | 18.3                   | 5.72  |
| 55-                     | 628                    | 669                    | 10.4                   | 13.2                   | 3.78  | 47.3                   | 54.6                   | 2.25 | 35.4                   | 45.6                   | 3.99  | 15.0                   | 17.9                   | 2.82  |
| 60-                     | 507                    | 513                    | 10.5                   | 15.4                   | 6.18  | 48.7                   | 56.1                   | 2.19 | 44.6                   | 51.7                   | 2.29  | 15.6                   | 20.1                   | 3.98  |
| 65-                     | 674                    | 313                    | 12.6                   | 11.8                   | -0.99 | 51.4                   | 61.0                   | 2.67 | 49.4                   | 59.4                   | 2.88  | 20.8                   | 26.2                   | 3.64  |
| 70-                     | 583                    | 250                    | 13.8                   | 9.6                    | -5.40 | 51.1                   | 54.0                   | 0.85 | 50.9                   | 65.2                   | 3.87  | 24.2                   | 25.6                   | 0.88  |
| Women                   |                        |                        |                        |                        |       |                        |                        |      |                        |                        |       |                        |                        |       |
| Overall                 | 7279                   | 3962                   | 13.8                   | 13.8                   | 0.02  | 41.7                   | 54.2                   | 4.10 | 28.3                   | 37.1                   | 4.28  | 10.3                   | 14.1                   | 4.84  |
| Age-groups              |                        |                        |                        |                        |       |                        |                        |      |                        |                        |       |                        |                        |       |
| 35-                     | 615                    | 251                    | 7.5                    | 7.2                    | -0.65 | 22.6                   | 26.3                   | 2.35 | 6.8                    | 10.8                   | 7.24  | 3.3                    | 4.0                    | 3.17  |
| 40-                     | 1000                   | 287                    | 9.4                    | 11.2                   | 2.66  | 27.6                   | 38.0                   | 5.05 | 11.7                   | 15.7                   | 4.61  | 4.1                    | 5.9                    | 5.81  |
| 45-                     | 1491                   | 563                    | 11.0                   | 9.8                    | -1.82 | 32.3                   | 42.6                   | 4.38 | 19.3                   | 23.5                   | 3.03  | 5.8                    | 8.7                    | 6.32  |
| 50-                     | 1309                   | 866                    | 15.1                   | 14.1                   | -1.00 | 43.9                   | 54.0                   | 3.24 | 28.7                   | 31.0                   | 1.16  | 8.3                    | 9.4                    | 1.94  |
| 55-                     | 838                    | 818                    | 15.7                   | 13.6                   | -2.17 | 47.5                   | 60.6                   | 3.83 | 33.9                   | 39.7                   | 2.48  | 8.8                    | 15.3                   | 8.80  |
| 60-                     | 610                    | 585                    | 19.2                   | 18.1                   | -0.87 | 53.5                   | 63.1                   | 2.58 | 40.5                   | 52.8                   | 4.17  | 16.7                   | 19.2                   | 2.11  |
| 65-                     | 799                    | 327                    | 18.0                   | 18.4                   | 0.28  | 59.0                   | 66.1                   | 1.76 | 48.4                   | 59.3                   | 3.17  | 23.7                   | 27.8                   | 2.54  |
| 70-                     | 617                    | 265                    | 18.2                   | 16.6                   | -1.36 | 60.2                   | 68.7                   | 2.05 | 51.4                   | 64.5                   | 3.57  | 21.4                   | 27.2                   | 3.75  |
| All subjects            |                        |                        |                        |                        |       |                        |                        |      |                        |                        |       |                        |                        |       |
| Overall                 | 12329                  | 7423                   | 13.0                   | 12.9                   | -0.05 | 43.6                   | 54.0                   | 3.35 | 31.0                   | 39.3                   | 3.75  | 11.7                   | 15.6                   | 4.53  |
| Age-groups <sup>a</sup> |                        |                        |                        |                        |       |                        |                        |      |                        |                        |       |                        |                        |       |
| 35-                     | 1029                   | 481                    | 8.7                    | 8.0                    | -1.04 | 30.3                   | 33.9                   | 2.39 | 10.2                   | 11.2                   | 1.49  | 3.8                    | 4.7                    | 3.63  |
| 40-                     | 1574                   | 589                    | 9.6                    | 10.1                   | 0.11  | 32.7                   | 41.3                   | 4.14 | 15.6                   | 17.9                   | 2.92  | 5.5                    | 6.5                    | 3.41  |
| 45-                     | 2328                   | 1008                   | 11.6                   | 10.8                   | -0.77 | 36.5                   | 46.6                   | 4.16 | 21.5                   | 26.2                   | 3.46  | 6.5                    | 10.5                   | 8.22  |
| 50-                     | 2142                   | 1605                   | 13.9                   | 12.8                   | -1.53 | 44.0                   | 53.9                   | 3.19 | 30.4                   | 34.6                   | 0.90  | 10.0                   | 12.8                   | 4.69  |
| 55-                     | 1466                   | 1487                   | 13.4                   | 13.4                   | 0.01  | 47.4                   | 58.1                   | 3.13 | 34.5                   | 42.2                   | 3.20  | 11.5                   | 16.4                   | 5.75  |
| 60-                     | 1117                   | 1098                   | 15.2                   | 16.9                   | 1.59  | 51.3                   | 59.9                   | 2.39 | 42.4                   | 52.3                   | 3.29  | 16.2                   | 19.6                   | 2.96  |
| 65-                     | 1473                   | 640                    | 15.6                   | 15.4                   | -0.39 | 55.5                   | 63.8                   | 2.11 | 48.9                   | 59.4                   | 3.04  | 22.3                   | 27.1                   | 2.98  |
| 70-                     | 1200                   | 515                    | 16.0                   | 13.2                   | -2.94 | 55.8                   | 61.5                   | 1.52 | 51.2                   | 64.9                   | 3.71  | 22.8                   | 26.4                   | 2.32  |

<sup>a</sup> adjusted for sex according to the distribution in the first survey.

Table 3. Association of body size with hypertension and type 2 diabetes in two population-based surveys in Shanghai, China

|                      | No. of subjects with neither diseases | Type 2 diabetes only |                   | Hypertension only |                   | Both              |                  |
|----------------------|---------------------------------------|----------------------|-------------------|-------------------|-------------------|-------------------|------------------|
|                      |                                       | N                    | OR (95%CI)        | N                 | OR (95%CI)        | N                 | OR (95%CI)       |
| <b>BMI residuals</b> |                                       |                      |                   |                   |                   |                   |                  |
| Men                  |                                       |                      |                   |                   |                   |                   |                  |
| Q1                   | 1260                                  | 156                  | 1.00              | 529               | 1.00              | 175               | 1.00             |
| Q2                   | 1224                                  | 142                  | 0.99 (0.77, 1.27) | 583               | 1.16 (1.00, 1.34) | 172               | 1.11(0.87, 1.41) |
| Q3                   | 1164                                  | 132                  | 1.09 (0.84, 1.41) | 651               | 1.50 (1.29, 1.74) | 171               | 1.36(1.07, 1.73) |
| Q4                   | 1079                                  | 123                  | 1.16 (0.88, 1.51) | 709               | 1.85 (1.59, 2.15) | 207               | 1.95(1.54, 2.47) |
|                      | <i>P for trend</i>                    |                      | 0.2472            | <i>&lt;0.0001</i> |                   | <i>&lt;0.0001</i> |                  |
| Women                |                                       |                      |                   |                   |                   |                   |                  |
| Q1                   | 1816                                  | 166                  | 1.00              | 600               | 1.00              | 223               | 1.00             |
| Q2                   | 1866                                  | 148                  | 1.02 (0.80, 1.29) | 629               | 1.29 (1.12, 1.48) | 162               | 0.96(0.77, 1.21) |
| Q3                   | 1835                                  | 125                  | 0.89 (0.69, 1.15) | 687               | 1.51 (1.31, 1.73) | 158               | 1.03(0.82, 1.31) |
| Q4                   | 1634                                  | 109                  | 0.94 (0.73, 1.23) | 847               | 2.23 (1.94, 2.57) | 215               | 1.85(1.15, 2.98) |
|                      | <i>P for trend</i>                    |                      | 0.4864            | <i>&lt;0.0001</i> |                   | 0.0067            |                  |
| All subjects         |                                       |                      |                   |                   |                   |                   |                  |
| Q1                   | 3048                                  | 330                  | 1.00              | 1162              | 1.00              | 385               | 1.00             |
| Q2                   | 3079                                  | 282                  | 1.00 (0.84, 1.19) | 1200              | 1.22 (1.11, 1.35) | 363               | 1.03(0.87, 1.22) |
| Q3                   | 2998                                  | 278                  | 0.98 (0.82, 1.18) | 1346              | 1.50 (1.36, 1.67) | 302               | 1.18(1.00, 1.40) |
| Q4                   | 2753                                  | 211                  | 1.04 (0.86, 1.26) | 1527              | 2.05 (1.85, 2.27) | 433               | 1.88(1.60, 2.21) |
|                      | <i>P for trend</i>                    |                      | 0.2280            | <i>&lt;0.0001</i> |                   | <i>&lt;0.0001</i> |                  |
| <b>WC residuals</b>  |                                       |                      |                   |                   |                   |                   |                  |
| Men                  |                                       |                      |                   |                   |                   |                   |                  |
| Q1                   | 1376                                  | 102                  | 1.00              | 531               | 1.00              | 111               | 1.00             |
| Q2                   | 1232                                  | 131                  | 1.34 (1.02, 1.78) | 601               | 1.23 (1.06, 1.42) | 155               | 1.41(1.07, 1.84) |
| Q3                   | 1130                                  | 148                  | 1.39 (0.70, 2.77) | 644               | 1.39 (1.20, 1.62) | 197               | 1.73(1.33, 2.25) |
| Q4                   | 989                                   | 172                  | 1.75 (1.33, 2.30) | 696               | 1.57 (1.35, 1.82) | 262               | 2.25(1.74, 2.90) |
|                      | <i>P for trend</i>                    |                      | <i>&lt;0.0001</i> | <i>&lt;0.0001</i> |                   | <i>&lt;0.0001</i> |                  |
| Women                |                                       |                      |                   |                   |                   |                   |                  |
| Q1                   | 2019                                  | 80                   | 1.00              | 598               | 1.00              | 108               | 1.00             |
| Q2                   | 1935                                  | 102                  | 1.17 (0.86, 1.59) | 651               | 1.04 (0.91, 1.18) | 117               | 0.94(0.71, 1.25) |
| Q3                   | 1708                                  | 172                  | 2.04 (1.54, 2.70) | 732               | 1.14 (0.99, 1.30) | 194               | 1.40(1.08, 1.82) |
| Q4                   | 1489                                  | 194                  | 2.37 (1.78, 3.15) | 782               | 1.13 (0.98, 1.30) | 339               | 2.06(1.26, 3.38) |
|                      | <i>P for trend</i>                    |                      | <i>&lt;0.0001</i> | 0.0216            |                   | <i>&lt;0.0001</i> |                  |
| All subjects         |                                       |                      |                   |                   |                   |                   |                  |
| Q1                   | 3453                                  | 161                  | 1.00              | 1109              | 1.00              | 203               | 1.00             |
| Q2                   | 3192                                  | 260                  | 1.26 (0.99, 1.60) | 1211              | 1.12 (1.01, 1.23) | 260               | 1.16(0.82, 1.62) |
| Q3                   | 2838                                  | 301                  | 1.66 (1.16, 2.36) | 1373              | 1.25 (1.13, 1.38) | 412               | 1.55(1.29, 1.87) |
| Q4                   | 2395                                  | 379                  | 2.03 (1.66, 2.47) | 1542              | 1.34 (1.09, 1.64) | 608               | 2.18(1.83, 2.61) |
|                      | <i>P for trend</i>                    |                      | 0.0001            | 0.0021            |                   | <i>&lt;0.0001</i> |                  |

Missing value excluded from the analysis.

OR: Adjusted for age (continuous variable), education (no formal education, primary school, middle school, high school, colleague or above, dummy variables), per capita income (<1000, 1000-2999, 3000-5000 and >5000 RMB Yuan / month, dummy variables), resident site (urban/rural area), family history of type 2 diabetes (yes/no), smoking (ever/never), alcohol drinking (ever/never), regular exercise (never/ever), phase of study (first /second survey); Additionally adjusted for sex (male/female) for all subjects.

1  
2  
3  
4 Table 4. Joint effect of general obesity and central obesity on type 2 diabetes among Chinese adults

| BMI                      | WC: Lower       |                    |                | WC: Higher      |                    |                | OR (95%CI) for hypertension |                   | OR (95%CI) for type 2 diabetes |                   |
|--------------------------|-----------------|--------------------|----------------|-----------------|--------------------|----------------|-----------------------------|-------------------|--------------------------------|-------------------|
|                          | No. of subjects | Hypertension N (%) | Diabetes N (%) | No. of subjects | Hypertension N (%) | Diabetes N (%) | WC: Lower                   | WC: Higher        | WC: Lower                      | WC: Higher        |
| <b>Men</b>               |                 |                    |                |                 |                    |                |                             |                   |                                |                   |
| <18.5                    | 212             | 36                 | 20             | 16              | 10                 | 6              | 0.61(0.42, 0.89)            | 3.68(1.28, 10.59) | 1.02(0.62, 1.67)               | 3.77(1.13, 12.56) |
| 18.5-23.9                | 3034            | 767                | 296            | 679             | 249                | 111            | 1.00                        | 1.56(0.94, 2.57)  | 1.00                           | 1.48(1.15, 1.90)  |
| 24.0-27.9                | 1010            | 356                | 134            | 2530            | 1179               | 483            | 1.61(1.13, 2.32)            | 2.38(1.78, 3.17)  | 1.46(1.16, 1.83)               | 1.85(1.16, 2.96)  |
| ≥28.0                    | 36              | 20                 | 4              | 960             | 580                | 224            | 3.91(1.95, 7.82)            | 4.67(3.97, 5.49)  | 1.71(0.55, 5.37)               | 2.60(2.12, 3.18)  |
| <i>P for interaction</i> |                 |                    |                |                 |                    |                | 0.0711                      |                   | 0.0933                         |                   |
| <b>Women</b>             |                 |                    |                |                 |                    |                |                             |                   |                                |                   |
| <18.5                    | 313             | 51                 | 19             | 8               | 2                  | 1              | 0.68(0.49, 0.94)            | 0.85(0.16, 4.51)  | 0.93(0.56, 1.54)               | 2.45(0.22, 26.72) |
| 18.5-23.9                | 4323            | 821                | 265            | 974             | 314                | 165            | 1.00                        | 1.48(1.26, 1.75)  | 1.00                           | 2.36(1.89, 2.94)  |
| 24.0-27.9                | 1330            | 384                | 93             | 2724            | 1102               | 437            | 1.84(1.59, 2.14)            | 2.21(1.97, 2.49)  | 1.19(0.92, 1.53)               | 2.14(1.81, 2.54)  |
| ≥28.0                    | 81              | 32                 | 9              | 1467            | 815                | 317            | 3.10(1.93, 5.00)            | 4.33(3.77, 4.96)  | 2.14(1.01, 4.52)               | 3.08(2.56, 3.71)  |
| <i>P for interaction</i> |                 |                    |                |                 |                    |                | 0.3524                      |                   | 0.4011                         |                   |
| <b>Total</b>             |                 |                    |                |                 |                    |                |                             |                   |                                |                   |
| <18.5                    | 525             | 87                 | 39             | 24              | 12                 | 7              | 0.65(0.51, 0.83)            | 2.25(0.85, 5.93)  | 0.97(0.68, 1.39)               | 3.45(1.18, 10.12) |
| 18.5-23.9                | 7357            | 1588               | 561            | 1653            | 563                | 276            | 1.00                        | 1.52(1.25, 1.85)  | 1.00                           | 1.88(1.42, 2.49)  |
| 24.0-27.9                | 2340            | 740                | 227            | 5254            | 2281               | 920            | 1.74(1.50, 2.03)            | 2.31(2.03, 2.62)  | 1.33(1.12, 1.58)               | 1.99(1.62, 2.45)  |
| ≥28.0                    | 117             | 5                  | 13             | 2427            | 1395               | 541            | 3.34(2.26, 4.94)            | 4.46(4.02, 4.96)  | 2.00(1.07, 3.74)               | 2.85(2.49, 3.27)  |
| <i>P for interaction</i> |                 |                    |                |                 |                    |                | 0.0562                      |                   | 0.0798                         |                   |

2 Higher WC defined as ≥ 85 cm for men and ≥ 80 cm for women

3 OR: Adjusted for age (continuous variable), education (no formal education, primary school, middle school, high school, colleague or above, dummy variables), per capita  
4 income (<1000, 1000-2999, 3000-5000 and >5000 RMB Yuan / month, dummy variables), resident site (urban/rural area), family history of type 2 diabetes (yes/no),  
5 smoking (ever/never), alcohol drinking (ever/never), regular exercise (never/ever), and phase of study (first /second survey).



1  
2  
3  
4  
5  
6  
7  
8  
9  
10  
11  
12  
13  
14  
15  
16  
17  
18  
19  
20  
21  
22  
23  
24  
25  
26  
27  
28  
29  
30  
31  
32  
33  
34  
35  
36  
37  
38  
39  
40  
41  
42  
43  
44  
45  
46  
47  
48  
49  
50  
51  
52  
53  
54  
55  
56  
57  
58  
59  
60

1           **Increased Waist Circumference and Prevalence of Type 2 Diabetes and Hypertension in**  
2           **Chinese Adults: Two Population-based Cross-sectional Surveys in Shanghai, China**

3  
4   Ye Ruan, MD, PhD <sup>1</sup>, Miao Mo, MD <sup>2</sup>, Lisa Joss-Moore, PhD <sup>3</sup>, Yan Yun Li, MD <sup>1</sup>, Qun Di Yang,  
5   MD, MPH <sup>1</sup>, Liang Shi, MD <sup>1</sup>, Hua Zhang, MD <sup>2</sup>, Rui Li, MD <sup>1\*</sup>, Wang Hong Xu, MD, PhD <sup>2\*</sup>  
6

7   **AFFILIATIONS:**

8   <sup>1</sup> Department of Diabetes Prevention and Control, Shanghai Municipal Center for Disease Control  
9   and Prevention, 1380 Zhong Shan Xi Road, Shanghai, 200336, People's Republic of China

10   <sup>2</sup> Department of Epidemiology, School of Public Health, Fudan University; Key Laboratory of  
11   Public Health Safety, Ministry of Education (Fudan University), 138 Yi Xue Yuan Road, Shanghai,  
12   200032, People's Republic of China

13   <sup>3</sup> Division of Neonatology, University of Utah, Salt Lake City, Utah 84108, USA  
14

15   **Correspondence to:**

16   Wang Hong Xu, MD, Ph.D,

17   Associate professor

18   Department of Epidemiology

19   School of Public Health

20   Fudan University

21   138 Yi Xue Yuan Road

22   Shanghai 200032

23   P. R. China

24   Tel: 86-21-54237679

25   Fax: 86-21-54237334

26   Email: wanghong.xu@fudan.edu.cn

1  
2 27

3  
4 or

5  
6 Rui Li, MD

7  
8 Department of Diabetes Prevention and Control

9  
10 Shanghai Municipal Center for Disease Control and Prevention

11  
12 1380 Zhong Shan Xi Road

13  
14 Shanghai 200336

15  
16 P. R. China

17  
18 Tel: 86-21-62758710

19  
20 Email: rli@scdc.sh.cn

21  
22  
23  
24  
25  
26  
27  
28  
29  
30  
31  
32  
33  
34  
35  
36  
37  
38  
39  
40  
41  
42  
43  
44  
45  
46  
47  
48  
49  
50  
51  
52  
53  
54  
55  
56  
57  
58  
59  
60

**RUNNING HEADER:** Obesity and prevalence of hypertension and T2DM in Chinese adults

**Word Count:**

Abstract: 249

Text: 2,658

1  
2  
3  
4  
5  
6  
7  
8  
9  
10  
11  
12  
13  
14  
15  
16  
17  
18  
19  
20  
21  
22  
23  
24  
25  
26  
27  
28  
29  
30  
31  
32  
33  
34  
35  
36  
37  
38  
39  
40  
41  
42  
43  
44 **Abstract:**

45 **Objective:** To evaluate the changes in body mass index (BMI) and waist circumference (WC)  
46 and their associations with the prevalence of hypertension and type 2 diabetes (T2DM) in Chinese  
47 adults.

48 **Design:** Two consecutive population-based cross-sectional surveys.

49 **Setting:** A total of 12 districts and 7 counties in Shanghai, China.

50 **Participants:** 12,329 randomly selected participants of the survey in 2002-2003, and 7,423  
51 randomly selected participants of the survey in 2009. All subjects were residents of Shanghai aged  
52 35-74 years old.

53 **Outcome measures:** Measured BMI and WC. Previously-diagnosed and newly-identified  
54 hypertension and T2DM by measured blood pressure, fasting and post-load glucose.

55 **Results:** While the participants of the two surveys were comparable in BMI in each age group,  
56 the participants of the 2009 survey had significantly larger WC than those of the 2002-03 survey,  
57 with an annual percentage change (APC) being higher among subjects aged 45-49 years old in both  
58 men and women. The increase in prevalence of T2DM was observed in all age groups and also  
59 appeared more evident in subjects aged 45-49 years old. The prevalence of hypertension was  
60 observed to increase more rapidly in elderly men and middle-aged women. Obesity, both overt and  
61 central, was associated with the risk of the two diseases, but BMI was more strongly linked to  
62 hypertension while WC appeared more evidently related with T2DM.

63 **Conclusion:** The prevalence of central obesity and related chronic diseases has been  
64 increasing in Shanghai, China. **Our findings provide useful information for the projection of**  
65 **growing burden of T2DM and hypertension in Chinese adults.**

66  
67 **Keywords:** type 2 diabetes; hypertension; prevalence; body mass index; waist circumference

68

## Article summary

### Article focus

- The shift in BMI and WC among Chinese adults over past one decade.
- The contribution of changes in overall and central obesity to the increasing burden of chronic disease in China.

### Key messages

- The WC increased in Chinese adults over the decade spanning 2002-2009, while BMI did not change over the same period.
- BMI was more strongly linked to hypertension while WC appeared more evidently related with T2DM in Chinese adults.
- Our findings provide useful information for the projection of a more rapidly growing burden of T2DM than hypertension in Chinese adults.

### Strengths and limitations of this study

- The strengths of this study include the strict process of multistage sampling in adult population of Shanghai, anthropometric measurement according to a standardized protocol and fasting and postprandial blood glucose tests for the participants.
- The nature of the cross-sectional study design limits our ability to directly evaluate the influence of overall and central obesity as well as the change of their prevalence on the risk of hypertension and T2DM.
- The differences in several demographic characteristics between the participants of the two surveys indicate the possibility of selection bias.

69

70

## 71 **Introduction**

72 A rising worldwide prevalence of chronic disease, manifested primarily as hypertension and  
73 type 2 diabetes (T2DM), has been well documented [1-4]. In Chinese aged 15-74 years old, the  
74 prevalence of hypertension increased from 5.11% in 1959, 7.73% in 1979 [5] and 13.58% in 1991[6]  
75 to 17.65% in 2002 [7]. The prevalence of T2DM tripled between 1980 (about 1.0%) and 1996  
76 (3.2%) [8 9], and reached 9.7% in 2008 among adults at 20 years old or above [10]. It is estimated  
77 that over 92 million people in China have T2DM. This represents approximately half of the world's  
78 diabetic population, and places China at the “global epicenter of the diabetes epidemic” [4].

79 Both hypertension and T2DM are associated with obesity [11 12]. Obesity is often measured  
80 by body mass index (BMI). Across the entire range of BMI, the risk of hypertension and T2DM  
81 increases, making a higher BMI a strong predictor of both hypertension and T2DM [4 12-14].  
82 However, a significant proportion of Asian adults diagnosed with T2DM are with the normal BMI,  
83 ie.18.5-25.0 kg/m<sup>2</sup> [15 16]. BMI is a general indicator of overt obesity, but does not give  
84 information about the distribution of obesity. Central obesity, often assessed via waist  
85 circumference (WC), is also strongly correlated with T2DM in both European and Asian adults [11  
86 17]. While changes in BMI have been well documented in China over past several decades [2 18],  
87 changes in WC, and thus central obesity, are not well described.

88 In this study, we took advantage of the data from population based cross-sectional surveys  
89 conducted in Shanghai in 2002-03 and in 2009. We used the data from the two surveys to evaluate  
90 correlations between shifts in BMI and WC with the prevalence of hypertension and T2DM in  
91 Chinese adults. Our results may help to better understand the contribution of overall obesity and  
92 central obesity in the increasing burden of chronic disease in China.

## 93 **Materials and Methods**

### 94 **Study Participants**

95 A representative sample of the general population was randomly selected through a multistage  
96 sampling process in the 2002-03 survey. Firstly, 4 districts and 2 counties were randomly selected

1  
2 97 from a total of 12 districts and 7 counties in Shanghai, China. And then, 1-2 sub-districts or towns  
3  
4 98 were randomly selected from each selected district or county. Next, 1-2 communities or villages,  
5  
6 99 usually 1,000-2,000 residents for each, were randomly selected from each selected sub-district or  
7  
8 100 town. Finally, eligible subjects (permanent residents of Shanghai, 15-74 years old and having been  
9  
10 101 in the city for at least 5 years) were randomly selected from the selected communities and villages  
11  
12 102 and were invited for participation. Pregnant women, individuals with type I diabetes, and physically  
13  
14 103 or mentally disabled persons were excluded from the participation. During the period of May  
15  
16 104 2002-October 2003, a total of 17,526 eligible subjects were recruited, and 14,401 (82.17%)  
17  
18 105 participated the survey.

21 106 The 2009 survey used the similar sampling method except that only 7 communities and  
22  
23 107 villages were randomly selected in the third stage of sampling. The inclusion and exclusion criteria  
24  
25 108 of the 2009 survey were also similar to those for the 2002-03 survey, except that only those at the  
26  
27 109 age of 35-74 years old were eligible for the 2009 survey. Among 7,627 eligible adults contacted  
28  
29 110 during the period of May-July 2009, 7,414 (97.21%) were interviewed and donated blood samples.

32 111 To make the two surveys comparable, we excluded 1,071 subjects younger than 35 years from  
33  
34 112 the 2002-03 survey. After further excluding subjects with missing information, the final analysis  
35  
36 113 included 5,050 men and 7,279 women in the 2002-03 survey and 3,461 men and 3,962 women in  
37  
38 114 the 2009 survey. The Institutional Review Board at Shanghai Municipal Center of Disease Control  
39  
40 115 and Prevention approved the study. Informed consent was obtained from each participant before  
41  
42 116 data collection.

#### 46 117 **Data Collection**

48 118 A similar survey approach was followed by the two investigations. In both surveys,  
49  
50 119 information on demographic and socioeconomic factors, diagnosis of diabetes, tobacco and alcohol  
51  
52 120 use, physical activity and family history of diabetes was collected by trained interviewers with a  
53  
54 121 structured questionnaire at community clinics located in the residential areas of the participants.

57 122 At the interview, each participant's blood pressure, body weight, standing height, and waist

1  
2 123 circumference (WC) were measured by trained staff. Blood pressure was measured on the right arm  
3  
4 124 in the sitting position using standard mercury sphygmomanometer after at least 5 minutes of rest.  
5  
6 125 The first and fifth Korotkoff sounds were recorded. Body weight and height were recorded while  
7  
8 126 the subject was in light clothing and without shoes. Body weight was measured with electronic  
9  
10 127 scales to the nearest 0.1 kg. Body height was measured to the nearest 0.1 cm by using a stadiometer.  
11  
12 128 WC, recorded to the nearest 0.1 cm, was taken with a cloth tape and was measured on bare skin at  
13  
14 129 the midline between the lower border of the ribs and the iliac crest in the horizontal plane after a  
15  
16 130 normal expiration. Two measurements were taken and the mean of the replicates was used in the  
17  
18 131 following analyses. Body mass index (BMI) was calculated as weight in kilograms divided by  
19  
20 132 height in meters squared ( $\text{kg/m}^2$ ) using the direct measurements.  
21  
22  
23

### 24 133 **Laboratory Measurements**

25  
26 134 After at least 10 hours of overnight fasting, 1-1.5 ml venous blood specimen was collected in a  
27  
28 135 vacuum tube containing sodium fluoride. All participants with no history of diabetes and having a  
29  
30 136 fasting plasma glucose level of  $< 7.0$  mmol per liter (mmol/l) were then asked to have an oral  
31  
32 137 glucose-tolerance test (OGTT). Blood samples were drawn at 0 and 120 minutes after a standard 75  
33  
34 138 gram glucose load. Plasma glucose was measured with Glucose oxidase-peroxidase (GOD-PAP)  
35  
36 139 method.  
37  
38

### 39 140 **Diagnosis of T2DM and Hypertension**

40  
41 141 Previously diagnosed T2DM and hypertension was identified by a positive response from the  
42  
43 142 participant to the question of “Have you ever diagnosed with T2DM/hypertension by a doctor?” and  
44  
45 143 confirmed by medical records in which prescriptions of anti-hypertensive or hypoglycemic  
46  
47 144 medications were presented. The consistent rate was 100%. For those who had a negative response,  
48  
49 145 the T2DM was diagnosed with measured glucose level by using the 1999 World Health  
50  
51 146 Organization diagnostic criteria [Department of Noncommunicable Disease Surveillance. Definition,  
52  
53 147 diagnosis and classification of diabetes mellitus and its complications: report of a WHO  
54  
55 148 consultation. Part 1. Diagnosis and classification of diabetes mellitus. Geneva: World Health  
56  
57  
58  
59  
60

1  
2 149 Organization, 1999. (Accessed July 5, 2010, at\_  
3  
4 150 [http://www.staff.ncl.ac.uk/philip.home/who\\_dmg.pdf](http://www.staff.ncl.ac.uk/philip.home/who_dmg.pdf).)] and hypertension referred to the subjects  
5  
6 151 with measured systolic blood pressure (SBP)  $\geq$  140 mmHg or diastolic blood pressure (DBP)  $\geq$  90  
7  
8 152 mmHg and confirmed by clinical visits. Total T2DM and hypertension included both previously  
9  
10 153 diagnosed and newly-diagnosed patients. 42.7% (1,110 of 2,598) diabetic patients and 10.3% (694  
11  
12 154 of 6,735) hypertensive patients were newly-diagnosed in the two surveys.

### 155 **Statistical Analysis**

156 SAS software 9.2 was used for all the statistical analyses. Characteristics of the subgroups  
157 were described using summary statistics (median, 25<sup>th</sup> and 75<sup>th</sup> percentile, frequencies, and  
158 percentages) separately for men and women. The differences between two surveys were compared  
159 using  $\chi^2$  test (category variables) and Wilcoxon tests (continuous variables). The annual percentage  
160 changes (APC) in prevalence between two surveys were calculated as (prevalence in 2009 –  
161 prevalence in 2002-03) / number of years using logarithms for each age group. Percentile curves  
162 were constructed for BMI and WC values in the two surveys by gender using the LMS (lambda, mu,  
163 sigma) method. Restricted cubic splines (RCS) were used to model a potential curvilinear  
164 relationship of BMI and WC with hypertension and diabetes using the 5<sup>th</sup>, 25<sup>th</sup>, 75<sup>th</sup> and 95<sup>th</sup>  
165 percentiles as fixed knots and the 50<sup>th</sup> percentile as the reference. Polynomial logistic regression  
166 were used to estimate the odds ratios (OR) and 95% confidence intervals (95% CI) of BMI and WC  
167 with T2DM and hypertension. Meta-analysis was applied to obtain the combined ORs and 95% CI  
168 considering the potential heterogeneity of the populations in the two surveys. The residual method  
169 was used to derive the independent effect of BMI and WC with each other in the models. *P* value  
170 less than 0.05 was considered as a test of significance based on two sides.

### 171 **Results**

172 The male participants in two surveys were similar in age, resident site and cigarette smoking  
173 while the females were comparable in cigarette smoking ( $P > 0.05$ ) (Table 1). Compared to the  
174 subjects in 2002-03 survey, the participants of 2009 survey, both men and women, had lower level



1  
2 175 of education, higher level of income per capita, more prior history of T2DM, higher frequency of  
3  
4 176 alcohol drinking and lower frequency of leisure time activity, and were more likely to have a family  
5  
6 177 history of diabetes.  
7

8  
9 178 Figure 1 shows the shapes of the BMI and WC distribution curves among men and women  
10  
11 179 changed over the period of the two surveys. After adjusting for age, education, per capita income,  
12  
13 180 resident site, smoking, drinking, regular exercise, and family history of T2DM, the curves of BMI  
14  
15 181 were almost overlapped in both men and women. However, the WC curves for men and women  
16  
17 182 were shifted to the right between 2002-03 and 2009, with the mean WC increasing from 83.6 to  
18  
19 183 85.3 cm for men and from 78.4 to 80.6 cm for women.  
20

21  
22 184 As presented in table 2, the prevalence of obesity, both overall and central, increased with  
23  
24 185 increasing age groups. While the prevalence of overall obesity ( $BMI \geq 28 \text{ kg/m}^2$ ) did not changed  
25  
26 186 between two surveys (all  $P$  values  $> 0.05$ ), the prevalence of central obesity were significantly  
27  
28 187 higher in 2009 survey in each age group (all  $P$  values  $< 0.001$ ). A more pronounced increase in  
29  
30 188 prevalence of central obesity and T2DM was observed among subjects aged 45-49 years old in both  
31  
32 189 men and women; whereas the change in prevalence of hypertension between two surveys appeared  
33  
34 190 more evident in older men and younger women over the period. Using the World Health  
35  
36 191 Organization (WHO) criteria for obesity did not change the results substantially (data not shown in  
37  
38 192 the tables).  
39  
40

41  
42 193 BMI and WC were highly correlated with each other, with a correlation coefficient of 0.77 ( $P <$   
43  
44 194 0.0001) among men and 0.78 ( $P < 0.0001$ ) among women after adjusting for age. Therefore, the  
45  
46 195 residual method was used to test the potential respective non-linear relationships of BMI and WC  
47  
48 196 with the risk of T2DM and hypertension (Figure 2). The dose-response analysis likewise showed a  
49  
50 197 statistically significant increased risk of T2DM at high level of WC and a significant elevated risk  
51  
52 198 of hypertension at high level of BMI in both men and women after adjusting for age, education, per  
53  
54 199 capita income, resident site, smoking, drinking, regular exercise, family history of T2DM and phase  
55  
56 200 of surveys, with  $P$  values for non-linear relationship tests  $< 0.05$ . No significant relationship was  
57  
58  
59  
60

1  
2 201 observed between BMI and T2DM in men and between WC and hypertension in women.

3  
4 202 As shown in table 3, in both sexes, BMI adjusted for WC (residuals) appeared more strongly  
5  
6 203 associated with hypertension while WC adjusted for BMI (residuals) was more evidently related  
7  
8 204 with T2DM. Comparing with the lowest quartile of BMI residuals, the risk of hypertension  
9  
10 205 increased 85% (95%CI: 1.59-2.15) in men and 1.23-fold (95%CI: 1.94-2.57) in women, whereas  
11  
12 206 the risk of T2DM did not increase significantly in both sexes. On the other hand, the ORs of the  
13  
14 207 highest versus the lowest quartile WC residuals for T2DM were 1.75 (95%CI: 1.33-2.30) in men  
15  
16  
17 208 and 2.37 (95%CI: 1.78-3.15) in women, higher than the OR of 1.57 (95%CI: 1.35-1.82) in men and  
18  
19 209 1.13 (95%CI: 0.98-1.30) in women for hypertension.

20  
21 210 We further evaluated the potential joint effect of BMI and WC on T2DM and hypertension  
22  
23 211 (table 4). The participants were classified into normal weight (BMI 18.5-23.9 kg/m<sup>2</sup>), overweight  
24  
25 212 (24.0-27.9 kg/m<sup>2</sup>), or obese ( $\geq 28$  kg/m<sup>2</sup>) based on data from Chinese adults, and were defined as  
26  
27 213 with normal or increased WC using sex-specific cut-offs (85 cm in men and 80 cm in women) [19].  
28  
29 214 The risk of T2DM and hypertension increased across groups defined by BMI and WC, with the  
30  
31 215 highest risk observed among men with the lowest BMI but a higher WC, and among those with the  
32  
33 216 highest BMI and a higher WC for hypertension. However, no significant interaction was observed  
34  
35 217 between BMI and WC (all *P* values for interaction tests  $> 0.05$ ).

## 36 37 38 39 40 218 **Discussion**

41  
42 219 In this representative sample of the adult population in Shanghai, the largest city in China, we  
43  
44 220 observed an increased prevalence of central obesity, hypertension and T2DM over the decade  
45  
46 221 spanning 2002-2009. In contrast, BMI did not change over the same period. Our results present a  
47  
48 222 snapshot of overt versus central obesity in the Chinese population and suggest that the epidemic of  
49  
50 223 central obesity in this population, which has been more closely associated with the prevalence of  
51  
52 224 T2DM, may lead to a more rapidly growing burden of T2DM in China.

53  
54  
55 225 Chinese adults have lower rates of overweight and obesity than their Western counterparts  
56  
57 226 using the WHO criteria (BMI  $\geq 25$  kg/m<sup>2</sup> for overweight and BMI  $\geq 30$  kg/m<sup>2</sup> for obesity) [15 16].  
58  
59  
60

1  
2 227 Nevertheless, increasing trends of BMI in Chinese adults have been well documented [18 20]. In  
3  
4 228 two national nutritional surveys undertaken in 1982 and 1992 in China, the prevalence of  
5  
6 229 overweight/obesity ( $BMI \geq 25 \text{ kg/m}^2$ ) in subjects 20-70 years of age was 10% and 15%,  
7  
8 230 respectively. Between 1992 and 2002, the combined prevalence of overweight and obesity increased  
9  
10 231 from 14.6 to 21.8% [21]. Interestingly, the increase in BMI among Chinese adults has slowed down  
11  
12 232 during past decades [2]. In this study, we did not observe an increase in BMI and prevalence of  
13  
14 233 obesity defined by the Chinese obesity standards or by WHO criteria (data not shown). Instead, we  
15  
16 234 observed a significant increase in WC, a measure of central obesity between surveys. Our  
17  
18 235 observation of increased WC in Chinese adults, without a concomitant increase in BMI, represents  
19  
20 236 an increasing burden of central obesity in this population. The increase in central obesity indicates  
21  
22 237 an upward trend in body fat percentages in the population who have been previously observed with  
23  
24 238 higher body fat percentages compared to other ethnic people with the same BMI [22 23].

25  
26  
27  
28 239 Both epidemic of overall and central obesity parallels a continuously increasing prevalence of  
29  
30 240 hypertension and T2DM in China [21]. Several studies indicate that overall obesity (BMI) is more  
31  
32 241 strongly associated with hypertension, while central obesity (WC) is more strongly associated with  
33  
34 242 T2DM [17 24-26]. The rationale for these associations is based on the notion that central obesity  
35  
36 243 reflects specific accumulation of visceral adipose tissue. Excess visceral adipose tissue is  
37  
38 244 metabolically unfavorable due to productions of free fatty acids and inflammatory mediators.  
39  
40 245 Overall obesity, on the other hand, represents a greater overall physiologic strain and effects  
41  
42 246 vascular and cardiac parameters more significantly. In this study, we observed a significant increase  
43  
44 247 in prevalence of T2DM regardless of gender or age groups, which was more pronounced than the  
45  
46 248 change in the prevalence of hypertension during the period of 2002-03 and 2009. We also observed  
47  
48 249 a closer association of central obesity with the prevalence of T2DM than with the prevalence of  
49  
50 250 hypertension. These results support the notion that central obesity in particular is a stronger risk  
51  
52 251 factor for T2DM than for hypertension in Chinese adults. Due to the cross-sectional design,  
53  
54 252 however, our study was unable to make a causal inference.  
55  
56  
57  
58  
59  
60

1  
2 253 The nature of the cross-sectional study design limits our ability to directly evaluate the  
3  
4 254 influence of overall and central obesity as well as the change of their prevalence on the risk of  
5  
6 255 hypertension and T2DM. The differences in several demographic characteristics between the  
7  
8 256 participants of the two surveys indicate the changes in general population over time. However,  
9  
10 257 selection bias could not be excluded. However, there are several strengths, including the strict  
11  
12 258 process of multistage sampling in adult population in Shanghai, anthropometric measurement  
13  
14 259 according to a standardized protocol and fasting and postprandial blood glucose tests for the  
15  
16 260 participants.

## 20 261 **Conclusions**

22 262 In summary, this study describes the potential association of central obesity with an upward  
23  
24 263 trend of T2DM, implicating a more rapidly growing burden of T2DM than hypertension in Chinese  
25  
26 264 adults. The findings in Shanghai, the largest city and one of the most economically developed areas  
27  
28 265 in China, provide useful information for the projection of future trends in the whole country.

## 32 266 **Acknowledgements**

34 267 We thank Dr. Xiao-ou Shu and Dr. Hui Cai of Vanderbilt University for their contributions in  
35  
36 268 study design and data analysis. The authors thank the study participants of the two cross-sectional  
37  
38 269 surveys and the healthcare workers in each community involved.

## 42 270 **Footnotes**

---

44 271 **Contributors** YR and MM contributed to data collection, data analysis and draft of the paper.  
45  
46 272 YR, YYL, QDY, and LS contributed to data collection and quality control. LJM contributed to  
47  
48 273 revision of the paper. HZ contributed to data clean and analysis. RL and WHX contributed to study  
49  
50 274 design, statistical analysis and revision of the paper. All authors contributed to the interpretation of  
51  
52 275 data and revision of the manuscript. All authors approved the final version.

55 276 **Funding** This study was supported by the Key Program of Shanghai Municipal Committee of  
56  
57 277 Science and Technology (04 DZ19502), the Shanghai Medical Development Program (01ZD001)

1  
2 278 and the Shanghai Municipal Health Bureau (GWDTR201204). W. H. Xu was supported by a  
3  
4 279 training grant from the Fogarty International Center (D43 TW008313 to X. O. Shu). The funders  
5  
6 280 had no role in study design, data collection or analysis, decision to publish, or preparation of the  
7  
8 281 manuscript.  
9

10 282 **Conflict of Interest:** None declared.  
11

12  
13 283  
14  
15  
16  
17  
18  
19  
20  
21  
22  
23  
24  
25  
26  
27  
28  
29  
30  
31  
32  
33  
34  
35  
36  
37  
38  
39  
40  
41  
42  
43  
44  
45  
46  
47  
48  
49  
50  
51  
52  
53  
54  
55  
56  
57  
58  
59  
60

## 284 REFERENCES

- 285 1. Kelly T, Yang W, Chen CS, Reynolds K, He J. Global burden of obesity in 2005 and projections to 2030. *Int J Obes*  
286 (Lond) 2008;**32**(9):1431-7 doi: ijo2008102 [pii]  
287 10.1038/ijo.2008.102[published Online First: Epub Date].
- 288 2. Popkin BM. Recent dynamics suggest selected countries catching up to US obesity. *Am J Clin Nutr*  
289 2010;**91**(1):284S-88S doi: ajcn.2009.28473C [pii]  
290 10.3945/ajcn.2009.28473C[published Online First: Epub Date].
- 291 3. Shaw JE, Sicree RA, Zimmet PZ. Global estimates of the prevalence of diabetes for 2010 and 2030. *Diabetes Res*  
292 *Clin Pract* 2010;**87**(1):4-14 doi: S0168-8227(09)00432-X [pii]  
293 10.1016/j.diabres.2009.10.007[published Online First: Epub Date].
- 294 4. Hu FB. Globalization of diabetes: the role of diet, lifestyle, and genes. *Diabetes care* 2011;**34**(6):1249-57 doi:  
295 10.2337/dc11-0442[published Online First: Epub Date].
- 296 5. Wu YK, Lu CQ, Gao RC, Yu JS, Liu GC. Nation-wide hypertension screening in China during 1979-1980. *Chin Med*  
297 *J (Engl)* 1982;**95**(2):101-8
- 298 6. Wu X, Duan X, Gu D, Hao J, Tao S, Fan D. Prevalence of hypertension and its trends in Chinese populations. *Int J*  
299 *Cardiol* 1995;**52**(1):39-44 doi: 016752739502443Z [pii][published Online First: Epub Date].
- 300 7. Wu Y, Huxley R, Li L, et al. Prevalence, awareness, treatment, and control of hypertension in China: data from the  
301 China National Nutrition and Health Survey 2002. *Circulation* 2008;**118**(25):2679-86 doi:  
302 10.1161/CIRCULATIONAHA.108.788166  
303 118/25/2679 [pii][published Online First: Epub Date].
- 304 8. [A mass survey of diabetes mellitus in a population of 300,000 in 14 provinces and municipalities in China (author's  
305 transl)]. *Zhonghua Nei Ke Za Zhi* 1981;**20**(11):678-83
- 306 9. Wang K, Li T, Xiang H. [Study on the epidemiological characteristics of diabetes mellitus and IGT in China].  
307 *Zhonghua Liu Xing Bing Xue Za Zhi* 1998;**19**(5):282-5
- 308 10. Yang W, Lu J, Weng J, et al. Prevalence of diabetes among men and women in China. *The New England journal of*  
309 *medicine* 2010;**362**(12):1090-101 doi: 10.1056/NEJMoa0908292[published Online First: Epub Date].
- 310 11. Nyamdorj R, Qiao Q, Lam TH, et al. BMI compared with central obesity indicators in relation to diabetes and  
311 hypertension in Asians. *Obesity (Silver Spring)* 2008;**16**(7):1622-35 doi: 10.1038/oby.2008.73  
312 oby200873 [pii][published Online First: Epub Date].
- 313 12. Ostchega Y, Hughes JP, Terry A, Fakhouri TH, Miller I. Abdominal obesity, body mass index, and hypertension in  
314 US adults: NHANES 2007-2010. *Am J Hypertens* 2012;**25**(12):1271-8 doi: 10.1038/ajh.2012.120  
315 ajh2012120 [pii][published Online First: Epub Date].
- 316 13. Barrett-Connor E. Epidemiology, obesity, and non-insulin-dependent diabetes mellitus. *Epidemiol Rev*  
317 1989;**11**:172-81
- 318 14. Weber MB, Oza-Frank R, Staimetz LR, Ali MK, Narayan KM. Type 2 diabetes in Asians: prevalence, risk factors,  
319 and effectiveness of behavioral intervention at individual and population levels. *Annu Rev Nutr*  
320 2012;**32**:417-39 doi: 10.1146/annurev-nutr-071811-150630[published Online First: Epub Date].
- 321 15. Lu B, Yang Y, Song X, et al. An evaluation of the International Diabetes Federation definition of metabolic  
322 syndrome in Chinese patients older than 30 years and diagnosed with type 2 diabetes mellitus. *Metabolism*  
323 2006;**55**(8):1088-96 doi: S0026-0495(06)00138-7 [pii]  
324 10.1016/j.metabol.2006.04.003[published Online First: Epub Date].
- 325 16. Tseng CH. Body mass index and waist circumference as determinants of coronary artery disease in Taiwanese adults  
326 with type 2 diabetes mellitus. *Int J Obes (Lond)* 2006;**30**(5):816-21 doi: 0803218 [pii]  
327 10.1038/sj.ijo.0803218[published Online First: Epub Date].
- 328 17. Feng RN, Zhao C, Wang C, et al. BMI is strongly associated with hypertension, and waist circumference is strongly  
329 associated with type 2 diabetes and dyslipidemia, in northern Chinese adults. *Journal of epidemiology / Japan*

- 1  
2 330 Epidemiological Association 2012;**22**(4):317-23
- 3 331 18. Wildman RP, Gu D, Muntner P, et al. Trends in overweight and obesity in Chinese adults: between 1991 and  
4 332 1999-2000. *Obesity (Silver Spring)* 2008;**16**(6):1448-53 doi: oby2008208 [pii]  
5 333 10.1038/oby.2008.208[published Online First: Epub Date]].  
6 334 19. Zhou BF. Predictive values of body mass index and waist circumference for risk factors of certain related diseases in  
7 335 Chinese adults--study on optimal cut-off points of body mass index and waist circumference in Chinese adults.  
8 336 *Biomed Environ Sci* 2002;**15**(1):83-96
- 9 337 20. Wang H, Du S, Zhai F, Popkin BM. Trends in the distribution of body mass index among Chinese adults, aged 20-45  
10 338 years (1989-2000). *Int J Obes (Lond)* 2007;**31**(2):272-8 doi: 0803416 [pii]  
11 339 10.1038/sj.ijo.0803416[published Online First: Epub Date]].  
12 340 21. Wang Y, Mi J, Shan XY, Wang QJ, Ge KY. Is China facing an obesity epidemic and the consequences? The trends in  
13 341 obesity and chronic disease in China. *Int J Obes (Lond)* 2007;**31**(1):177-88 doi: 0803354 [pii]  
14 342 10.1038/sj.ijo.0803354[published Online First: Epub Date]].  
15 343 22. Wang J, Thornton JC, Burastero S, et al. Comparisons for body mass index and body fat percent among Puerto  
16 344 Ricans, blacks, whites and Asians living in the New York City area. *Obes Res* 1996;**4**(4):377-84
- 17 345 23. Araneta MR, Wingard DL, Barrett-Connor E. Type 2 diabetes and metabolic syndrome in Filipina-American  
18 346 women : a high-risk nonobese population. *Diabetes Care* 2002;**25**(3):494-9
- 19 347 24. Jacobs EJ, Newton CC, Wang Y, et al. Waist circumference and all-cause mortality in a large US cohort. *Archives of*  
20 348 *internal medicine* 2010;**170**(15):1293-301 doi: 10.1001/archinternmed.2010.201[published Online First: Epub  
21 349 Date]].  
22 350 25. InterAct C, Langenberg C, Sharp SJ, et al. Long-term risk of incident type 2 diabetes and measures of overall and  
23 351 regional obesity: the EPIC-InterAct case-cohort study. *PLoS medicine* 2012;**9**(6):e1001230 doi:  
24 352 10.1371/journal.pmed.1001230[published Online First: Epub Date]].  
25 353 26. Li R, Shi L, Jia J, et al. Differentiating the Associations of Waist Circumference and Body Mass Index With  
26 354 Cardiovascular Disease Risk in a Chinese Population. *Asia-Pacific journal of public health / Asia-Pacific*  
27 355 *Academic Consortium for Public Health* 2012 doi: 10.1177/1010539512465306[published Online First: Epub  
28 356 Date]].  
29 357  
30 358

1  
2 359 Figure 1. Shift in BMI and WC over the period of the two population-based surveys

3  
4 360 Figure 2. Non-linear dose-response relationship of BMI and WC with hypertension and T2DM

5  
6 361 among participants of the two population-based surveys

7  
8 362  
9  
10  
11  
12  
13  
14  
15  
16  
17  
18  
19  
20  
21  
22  
23  
24  
25  
26  
27  
28  
29  
30  
31  
32  
33  
34  
35  
36  
37  
38  
39  
40  
41  
42  
43  
44  
45  
46  
47  
48  
49  
50  
51  
52  
53  
54  
55  
56  
57  
58  
59  
60



363 Table 1. Characteristics of participants in two population-based surveys in Shanghai, China

| Characteristics                  | 1 <sup>st</sup> survey |                    | 2 <sup>nd</sup> survey |                    | <i>P-value between surveys<sup>a</sup></i> |                 |
|----------------------------------|------------------------|--------------------|------------------------|--------------------|--------------------------------------------|-----------------|
|                                  | Men<br>(N=5,050)       | Women<br>(N=7,279) | Men<br>(N=3,461)       | Women<br>(N=3,962) | <i>In men</i>                              | <i>In women</i> |
| Age (yrs., mean ± SD)            | 54.8 ± 10.8            | 53.1 ± 10.3        | 54.7 ± 9.5             | 54.7 ± 9.1         | 0.55                                       | <0.0001         |
| Resident site (%)                |                        |                    |                        |                    |                                            |                 |
| Urban                            | 71.1                   | 63.0               | 72.4                   | 72.0               |                                            |                 |
| Rural                            | 29.0                   | 37.0               | 27.7                   | 28.0               | 0.19                                       | <0.0001         |
| Education (%)                    |                        |                    |                        |                    |                                            |                 |
| No formal education              | 4.1                    | 18.4               | 3.2                    | 9.5                |                                            |                 |
| Primary school                   | 18.2                   | 23.0               | 14.7                   | 17.7               |                                            |                 |
| Middle school                    | 35.3                   | 31.1               | 45.7                   | 45.2               |                                            |                 |
| High school                      | 27.6                   | 22.6               | 27.6                   | 23.8               |                                            |                 |
| College or above                 | 14.8                   | 4.9                | 8.8                    | 3.9                | 0.0025                                     | <0.0001         |
| Per capita income (yuan/mo.) (%) |                        |                    |                        |                    |                                            |                 |
| <1000                            | 37.0                   | 45.5               | 4.9                    | 4.0                |                                            |                 |
| 1000-2999                        | 38.3                   | 38.4               | 41.8                   | 46.7               |                                            |                 |
| 3000-5000                        | 22.5                   | 17.9               | 33.2                   | 33.3               |                                            |                 |
| >5000                            | 2.2                    | 1.3                | 20.0                   | 16.0               | <0.0001                                    | <0.0001         |
| Family history of type 2diabetes | 12.3                   | 13.1               | 16.4                   | 19.0               | <0.0001                                    | <0.0001         |
| Prevalence of type 2diabetes (%) | 13.6                   | 10.3               | 17.4                   | 14.1               | <0.0001                                    | <0.0001         |
| Prevalence of hypertension (%)   | 34.8                   | 28.3               | 41.8                   | 37.1               | <0.0001                                    | <0.0001         |
| Cigarette smoking (%)            | 61.4                   | 1.7                | 62.6                   | 1.8                | 0.22                                       | 0.93            |
| Alcohol drinking (%)             | 40.4                   | 2.4                | 54.0                   | 5.0                | <0.0001                                    | <0.0001         |
| Leisure-time activity (%)        | 13.3                   | 13.1               | 10.8                   | 9.0                | 0.0009                                     | <0.0001         |

364 <sup>a</sup> *P* for Wilcoxon tests or chi-square tests

Table 2. Prevalence of obesity, hypertension and type 2 diabetes in participants of the two population-based surveys by age groups in Shanghai, China

|                         | No. of subjects        |                        | Overall Obesity        |                        | APC   | Central obesity        |                        | APC  | Hypertension           |                        | APC   | Type 2 diabetes        |                        | APC   |
|-------------------------|------------------------|------------------------|------------------------|------------------------|-------|------------------------|------------------------|------|------------------------|------------------------|-------|------------------------|------------------------|-------|
|                         | 1 <sup>st</sup> survey | 2 <sup>nd</sup> survey | 1 <sup>st</sup> survey | 2 <sup>nd</sup> survey | (%)   | 1 <sup>st</sup> survey | 2 <sup>nd</sup> survey | (%)  | 1 <sup>st</sup> survey | 2 <sup>nd</sup> survey | (%)   | 1 <sup>st</sup> survey | 2 <sup>nd</sup> survey | (%)   |
| Men                     |                        |                        |                        |                        |       |                        |                        |      |                        |                        |       |                        |                        |       |
| Overall                 | 5050                   | 3461                   | 11.7                   | 11.9                   | 0.21  | 46.3                   | 53.8                   | 2.35 | 34.8                   | 41.8                   | 2.87  | 13.6                   | 17.4                   | 3.78  |
| Age-groups              |                        |                        |                        |                        |       |                        |                        |      |                        |                        |       |                        |                        |       |
| 35-                     | 414                    | 230                    | 10.5                   | 9.1                    | -2.11 | 41.8                   | 45.2                   | 1.22 | 15.2                   | 11.7                   | -3.92 | 4.6                    | 5.7                    | 3.25  |
| 40-                     | 574                    | 302                    | 10.0                   | 8.3                    | -2.83 | 41.8                   | 47.00                  | 1.85 | 22.5                   | 21.9                   | -0.43 | 7.8                    | 7.6                    | -0.44 |
| 45-                     | 837                    | 445                    | 12.6                   | 12.6                   | -0.04 | 44.0                   | 53.7                   | 3.12 | 25.3                   | 31.0                   | 3.16  | 7.8                    | 13.7                   | 9.13  |
| 50-                     | 833                    | 739                    | 12.2                   | 10.8                   | -1.76 | 44.1                   | 53.8                   | 3.12 | 33.1                   | 40.3                   | 3.07  | 12.7                   | 18.3                   | 5.72  |
| 55-                     | 628                    | 669                    | 10.4                   | 13.2                   | 3.78  | 47.3                   | 54.6                   | 2.25 | 35.4                   | 45.6                   | 3.99  | 15.0                   | 17.9                   | 2.82  |
| 60-                     | 507                    | 513                    | 10.5                   | 15.4                   | 6.18  | 48.7                   | 56.1                   | 2.19 | 44.6                   | 51.7                   | 2.29  | 15.6                   | 20.1                   | 3.98  |
| 65-                     | 674                    | 313                    | 12.6                   | 11.8                   | -0.99 | 51.4                   | 61.0                   | 2.67 | 49.4                   | 59.4                   | 2.88  | 20.8                   | 26.2                   | 3.64  |
| 70-                     | 583                    | 250                    | 13.8                   | 9.6                    | -5.40 | 51.1                   | 54.0                   | 0.85 | 50.9                   | 65.2                   | 3.87  | 24.2                   | 25.6                   | 0.88  |
| Women                   |                        |                        |                        |                        |       |                        |                        |      |                        |                        |       |                        |                        |       |
| Overall                 | 7279                   | 3962                   | 13.8                   | 13.8                   | 0.02  | 41.7                   | 54.2                   | 4.10 | 28.3                   | 37.1                   | 4.28  | 10.3                   | 14.1                   | 4.84  |
| Age-groups              |                        |                        |                        |                        |       |                        |                        |      |                        |                        |       |                        |                        |       |
| 35-                     | 615                    | 251                    | 7.5                    | 7.2                    | -0.65 | 22.6                   | 26.3                   | 2.35 | 6.8                    | 10.8                   | 7.24  | 3.3                    | 4.0                    | 3.17  |
| 40-                     | 1000                   | 287                    | 9.4                    | 11.2                   | 2.66  | 27.6                   | 38.0                   | 5.05 | 11.7                   | 15.7                   | 4.61  | 4.1                    | 5.9                    | 5.81  |
| 45-                     | 1491                   | 563                    | 11.0                   | 9.8                    | -1.82 | 32.3                   | 42.6                   | 4.38 | 19.3                   | 23.5                   | 3.03  | 5.8                    | 8.7                    | 6.32  |
| 50-                     | 1309                   | 866                    | 15.1                   | 14.1                   | -1.00 | 43.9                   | 54.0                   | 3.24 | 28.7                   | 31.0                   | 1.16  | 8.3                    | 9.4                    | 1.94  |
| 55-                     | 838                    | 818                    | 15.7                   | 13.6                   | -2.17 | 47.5                   | 60.6                   | 3.83 | 33.9                   | 39.7                   | 2.48  | 8.8                    | 15.3                   | 8.80  |
| 60-                     | 610                    | 585                    | 19.2                   | 18.1                   | -0.87 | 53.5                   | 63.1                   | 2.58 | 40.5                   | 52.8                   | 4.17  | 16.7                   | 19.2                   | 2.11  |
| 65-                     | 799                    | 327                    | 18.0                   | 18.4                   | 0.28  | 59.0                   | 66.1                   | 1.76 | 48.4                   | 59.3                   | 3.17  | 23.7                   | 27.8                   | 2.54  |
| 70-                     | 617                    | 265                    | 18.2                   | 16.6                   | -1.36 | 60.2                   | 68.7                   | 2.05 | 51.4                   | 64.5                   | 3.57  | 21.4                   | 27.2                   | 3.75  |
| All subjects            |                        |                        |                        |                        |       |                        |                        |      |                        |                        |       |                        |                        |       |
| Overall                 | 12329                  | 7423                   | 13.0                   | 12.9                   | -0.05 | 43.6                   | 54.0                   | 3.35 | 31.0                   | 39.3                   | 3.75  | 11.7                   | 15.6                   | 4.53  |
| Age-groups <sup>a</sup> |                        |                        |                        |                        |       |                        |                        |      |                        |                        |       |                        |                        |       |
| 35-                     | 1029                   | 481                    | 8.7                    | 8.0                    | -1.04 | 30.3                   | 33.9                   | 2.39 | 10.2                   | 11.2                   | 1.49  | 3.8                    | 4.7                    | 3.63  |
| 40-                     | 1574                   | 589                    | 9.6                    | 10.1                   | 0.11  | 32.7                   | 41.3                   | 4.14 | 15.6                   | 17.9                   | 2.92  | 5.5                    | 6.5                    | 3.41  |
| 45-                     | 2328                   | 1008                   | 11.6                   | 10.8                   | -0.77 | 36.5                   | 46.6                   | 4.16 | 21.5                   | 26.2                   | 3.46  | 6.5                    | 10.5                   | 8.22  |
| 50-                     | 2142                   | 1605                   | 13.9                   | 12.8                   | -1.53 | 44.0                   | 53.9                   | 3.19 | 30.4                   | 34.6                   | 0.90  | 10.0                   | 12.8                   | 4.69  |
| 55-                     | 1466                   | 1487                   | 13.4                   | 13.4                   | 0.01  | 47.4                   | 58.1                   | 3.13 | 34.5                   | 42.2                   | 3.20  | 11.5                   | 16.4                   | 5.75  |
| 60-                     | 1117                   | 1098                   | 15.2                   | 16.9                   | 1.59  | 51.3                   | 59.9                   | 2.39 | 42.4                   | 52.3                   | 3.29  | 16.2                   | 19.6                   | 2.96  |
| 65-                     | 1473                   | 640                    | 15.6                   | 15.4                   | -0.39 | 55.5                   | 63.8                   | 2.11 | 48.9                   | 59.4                   | 3.04  | 22.3                   | 27.1                   | 2.98  |
| 70-                     | 1200                   | 515                    | 16.0                   | 13.2                   | -2.94 | 55.8                   | 61.5                   | 1.52 | 51.2                   | 64.9                   | 3.71  | 22.8                   | 26.4                   | 2.32  |

<sup>a</sup> adjusted for sex according to the distribution in the first survey.

Table 3. Association of body size with hypertension and type 2 diabetes in two population-based surveys in Shanghai, China

|                      | No. of subjects with neither diseases | Type 2 diabetes only |                   | Hypertension only |                   | Both              |                  |
|----------------------|---------------------------------------|----------------------|-------------------|-------------------|-------------------|-------------------|------------------|
|                      |                                       | N                    | OR (95%CI)        | N                 | OR (95%CI)        | N                 | OR (95%CI)       |
| <b>BMI residuals</b> |                                       |                      |                   |                   |                   |                   |                  |
| Men                  |                                       |                      |                   |                   |                   |                   |                  |
| Q1                   | 1260                                  | 156                  | 1.00              | 529               | 1.00              | 175               | 1.00             |
| Q2                   | 1224                                  | 142                  | 0.99 (0.77, 1.27) | 583               | 1.16 (1.00, 1.34) | 172               | 1.11(0.87, 1.41) |
| Q3                   | 1164                                  | 132                  | 1.09 (0.84, 1.41) | 651               | 1.50 (1.29, 1.74) | 171               | 1.36(1.07, 1.73) |
| Q4                   | 1079                                  | 123                  | 1.16 (0.88, 1.51) | 709               | 1.85 (1.59, 2.15) | 207               | 1.95(1.54, 2.47) |
|                      | <i>P for trend</i>                    |                      | 0.2472            | <i>&lt;0.0001</i> |                   | <i>&lt;0.0001</i> |                  |
| Women                |                                       |                      |                   |                   |                   |                   |                  |
| Q1                   | 1816                                  | 166                  | 1.00              | 600               | 1.00              | 223               | 1.00             |
| Q2                   | 1866                                  | 148                  | 1.02 (0.80, 1.29) | 629               | 1.29 (1.12, 1.48) | 162               | 0.96(0.77, 1.21) |
| Q3                   | 1835                                  | 125                  | 0.89 (0.69, 1.15) | 687               | 1.51 (1.31, 1.73) | 158               | 1.03(0.82, 1.31) |
| Q4                   | 1634                                  | 109                  | 0.94 (0.73, 1.23) | 847               | 2.23 (1.94, 2.57) | 215               | 1.85(1.15, 2.98) |
|                      | <i>P for trend</i>                    |                      | 0.4864            | <i>&lt;0.0001</i> |                   | 0.0067            |                  |
| All subjects         |                                       |                      |                   |                   |                   |                   |                  |
| Q1                   | 3048                                  | 330                  | 1.00              | 1162              | 1.00              | 385               | 1.00             |
| Q2                   | 3079                                  | 282                  | 1.00 (0.84, 1.19) | 1200              | 1.22 (1.11, 1.35) | 363               | 1.03(0.87, 1.22) |
| Q3                   | 2998                                  | 278                  | 0.98 (0.82, 1.18) | 1346              | 1.50 (1.36, 1.67) | 302               | 1.18(1.00, 1.40) |
| Q4                   | 2753                                  | 211                  | 1.04 (0.86, 1.26) | 1527              | 2.05 (1.85, 2.27) | 433               | 1.88(1.60, 2.21) |
|                      | <i>P for trend</i>                    |                      | 0.2280            | <i>&lt;0.0001</i> |                   | <i>&lt;0.0001</i> |                  |
| <b>WC residuals</b>  |                                       |                      |                   |                   |                   |                   |                  |
| Men                  |                                       |                      |                   |                   |                   |                   |                  |
| Q1                   | 1376                                  | 102                  | 1.00              | 531               | 1.00              | 111               | 1.00             |
| Q2                   | 1232                                  | 131                  | 1.34 (1.02, 1.78) | 601               | 1.23 (1.06, 1.42) | 155               | 1.41(1.07, 1.84) |
| Q3                   | 1130                                  | 148                  | 1.39 (0.70, 2.77) | 644               | 1.39 (1.20, 1.62) | 197               | 1.73(1.33, 2.25) |
| Q4                   | 989                                   | 172                  | 1.75 (1.33, 2.30) | 696               | 1.57 (1.35, 1.82) | 262               | 2.25(1.74, 2.90) |
|                      | <i>P for trend</i>                    |                      | <i>&lt;0.0001</i> | <i>&lt;0.0001</i> |                   | <i>&lt;0.0001</i> |                  |
| Women                |                                       |                      |                   |                   |                   |                   |                  |
| Q1                   | 2019                                  | 80                   | 1.00              | 598               | 1.00              | 108               | 1.00             |
| Q2                   | 1935                                  | 102                  | 1.17 (0.86, 1.59) | 651               | 1.04 (0.91, 1.18) | 117               | 0.94(0.71, 1.25) |
| Q3                   | 1708                                  | 172                  | 2.04 (1.54, 2.70) | 732               | 1.14 (0.99, 1.30) | 194               | 1.40(1.08, 1.82) |
| Q4                   | 1489                                  | 194                  | 2.37 (1.78, 3.15) | 782               | 1.13 (0.98, 1.30) | 339               | 2.06(1.26, 3.38) |
|                      | <i>P for trend</i>                    |                      | <i>&lt;0.0001</i> | 0.0216            |                   | <i>&lt;0.0001</i> |                  |
| All subjects         |                                       |                      |                   |                   |                   |                   |                  |
| Q1                   | 3453                                  | 161                  | 1.00              | 1109              | 1.00              | 203               | 1.00             |
| Q2                   | 3192                                  | 260                  | 1.26 (0.99, 1.60) | 1211              | 1.12 (1.01, 1.23) | 260               | 1.16(0.82, 1.62) |
| Q3                   | 2838                                  | 301                  | 1.66 (1.16, 2.36) | 1373              | 1.25 (1.13, 1.38) | 412               | 1.55(1.29, 1.87) |
| Q4                   | 2395                                  | 379                  | 2.03 (1.66, 2.47) | 1542              | 1.34 (1.09, 1.64) | 608               | 2.18(1.83, 2.61) |
|                      | <i>P for trend</i>                    |                      | 0.0001            | 0.0021            |                   | <i>&lt;0.0001</i> |                  |

Missing value excluded from the analysis.

OR: Adjusted for age (continuous variable), education (no formal education, primary school, middle school, high school, colleague or above, dummy variables), per capita income (<1000, 1000-2999, 3000-5000 and >5000 RMB Yuan / month, dummy variables), resident site (urban/rural area), family history of type 2 diabetes (yes/no), smoking (ever/never), alcohol drinking (ever/never), regular exercise (never/ever), phase of study (first /second survey); Additionally adjusted for sex (male/female) for all subjects.

1 Table 4. Joint effect of general obesity and central obesity on type 2 diabetes among Chinese adults

| BMI          | WC: Lower       |                    |                | WC: Higher      |                          |                | OR (95%CI) for hypertension |                   | OR (95%CI) for type 2 diabetes |                   |
|--------------|-----------------|--------------------|----------------|-----------------|--------------------------|----------------|-----------------------------|-------------------|--------------------------------|-------------------|
|              | No. of subjects | Hypertension N (%) | Diabetes N (%) | No. of subjects | Hypertension N (%)       | Diabetes N (%) | WC: Lower                   | WC: Higher        | WC: Lower                      | WC: Higher        |
| <b>Men</b>   |                 |                    |                |                 |                          |                |                             |                   |                                |                   |
| <18.5        | 212             | 36                 | 20             | 16              | 10                       | 6              | 0.61(0.42, 0.89)            | 3.68(1.28, 10.59) | 1.02(0.62, 1.67)               | 3.77(1.13, 12.56) |
| 18.5-23.9    | 3034            | 767                | 296            | 679             | 249                      | 111            | 1.00                        | 1.56(0.94, 2.57)  | 1.00                           | 1.48(1.15, 1.90)  |
| 24.0-27.9    | 1010            | 356                | 134            | 2530            | 1179                     | 483            | 1.61(1.13, 2.32)            | 2.38(1.78, 3.17)  | 1.46(1.16, 1.83)               | 1.85(1.16, 2.96)  |
| ≥28.0        | 36              | 20                 | 4              | 960             | 580                      | 224            | 3.91(1.95, 7.82)            | 4.67(3.97, 5.49)  | 1.71(0.55, 5.37)               | 2.60(2.12, 3.18)  |
|              |                 |                    |                |                 | <i>P for interaction</i> |                | 0.0711                      |                   | 0.0933                         |                   |
| <b>Women</b> |                 |                    |                |                 |                          |                |                             |                   |                                |                   |
| <18.5        | 313             | 51                 | 19             | 8               | 2                        | 1              | 0.68(0.49, 0.94)            | 0.85(0.16, 4.51)  | 0.93(0.56, 1.54)               | 2.45(0.22, 26.72) |
| 18.5-23.9    | 4323            | 821                | 265            | 974             | 314                      | 165            | 1.00                        | 1.48(1.26, 1.75)  | 1.00                           | 2.36(1.89, 2.94)  |
| 24.0-27.9    | 1330            | 384                | 93             | 2724            | 1102                     | 437            | 1.84(1.59, 2.14)            | 2.21(1.97, 2.49)  | 1.19(0.92, 1.53)               | 2.14(1.81, 2.54)  |
| ≥28.0        | 81              | 32                 | 9              | 1467            | 815                      | 317            | 3.10(1.93, 5.00)            | 4.33(3.77, 4.96)  | 2.14(1.01, 4.52)               | 3.08(2.56, 3.71)  |
|              |                 |                    |                |                 | <i>P for interaction</i> |                | 0.3524                      |                   | 0.4011                         |                   |
| <b>Total</b> |                 |                    |                |                 |                          |                |                             |                   |                                |                   |
| <18.5        | 525             | 87                 | 39             | 24              | 12                       | 7              | 0.65(0.51, 0.83)            | 2.25(0.85, 5.93)  | 0.97(0.68, 1.39)               | 3.45(1.18, 10.12) |
| 18.5-23.9    | 7357            | 1588               | 561            | 1653            | 563                      | 276            | 1.00                        | 1.52(1.25, 1.85)  | 1.00                           | 1.88(1.42, 2.49)  |
| 24.0-27.9    | 2340            | 740                | 227            | 5254            | 2281                     | 920            | 1.74(1.50, 2.03)            | 2.31(2.03, 2.62)  | 1.33(1.12, 1.58)               | 1.99(1.62, 2.45)  |
| ≥28.0        | 117             | 5                  | 13             | 2427            | 1395                     | 541            | 3.34(2.26, 4.94)            | 4.46(4.02, 4.96)  | 2.00(1.07, 3.74)               | 2.85(2.49, 3.27)  |
|              |                 |                    |                |                 | <i>P for interaction</i> |                | 0.0562                      |                   | 0.0798                         |                   |

2 Higher WC defined as ≥ 85 cm for men and ≥ 80 cm for women

3 OR: Adjusted for age (continuous variable), education (no formal education, primary school, middle school, high school, colleague or above, dummy variables), per capita  
4 income (<1000, 1000-2999, 3000-5000 and >5000 RMB Yuan / month, dummy variables), resident site (urban/rural area), family history of type 2 diabetes (yes/no),  
5 smoking (ever/never), alcohol drinking (ever/never), regular exercise (never/ever), and phase of study (first /second survey).

1  
2  
3  
4  
5  
6  
7  
8  
9  
10  
11  
12  
13  
14  
15  
16  
17  
18  
19  
20  
21  
22  
23  
24  
25  
26  
27  
28  
29  
30  
31  
32  
33  
34  
35  
36  
37  
38  
39  
40  
41  
42  
43  
44  
45  
46  
47  
48  
49

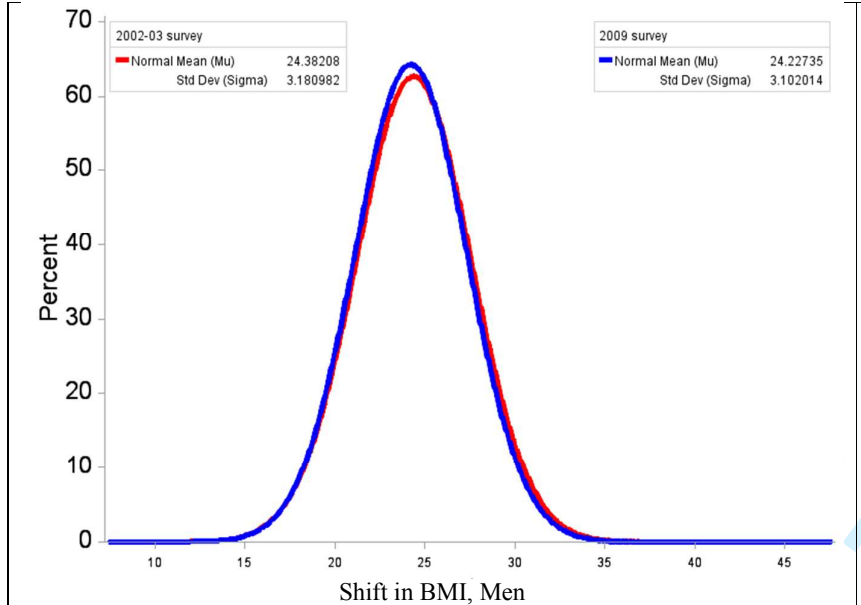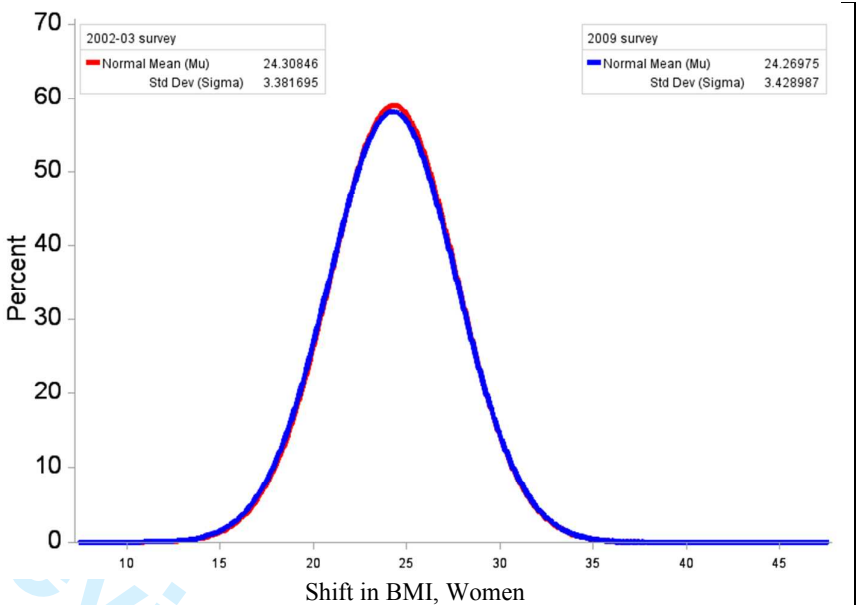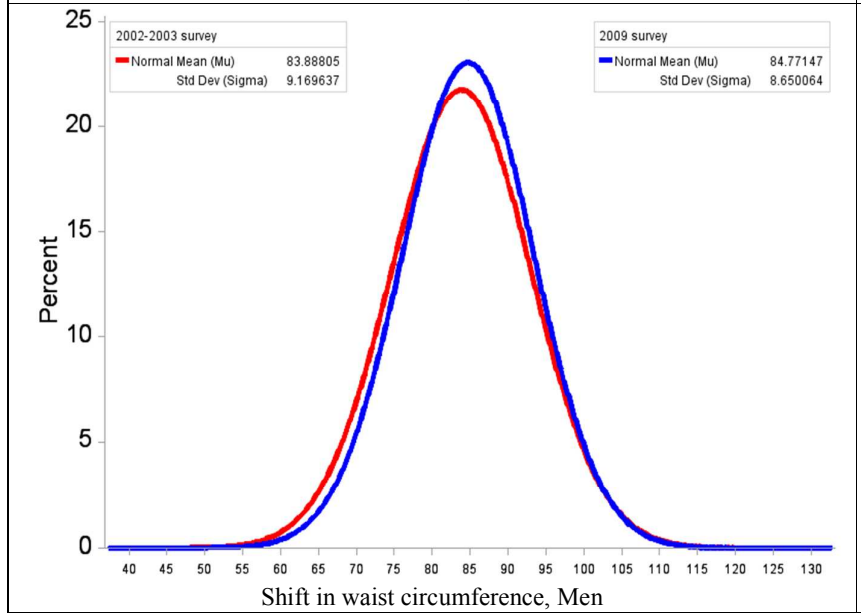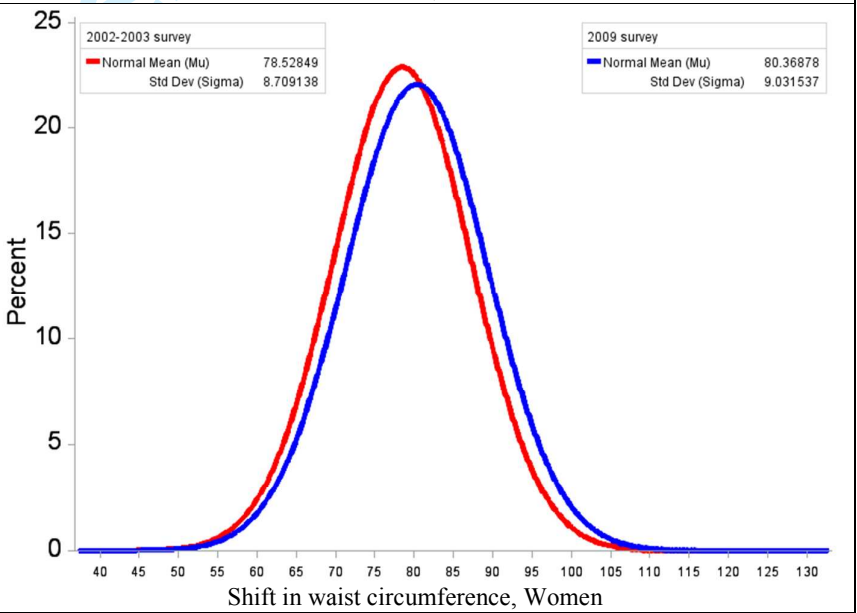

1  
2  
3  
4  
5  
6  
7  
8  
9  
10  
11  
12  
13  
14  
15  
16  
17  
18  
19  
20  
21  
22  
23  
24  
25  
26  
27  
28  
29  
30  
31  
32  
33  
34  
35  
36  
37  
38  
39  
40  
41  
42  
43  
44  
45  
46  
47  
48  
49

Association between body mass index and type 2 diabetes

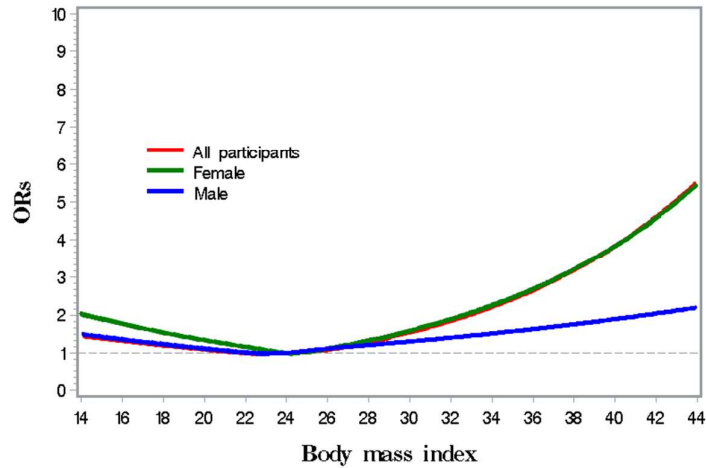

Association between body mass index and hypertension

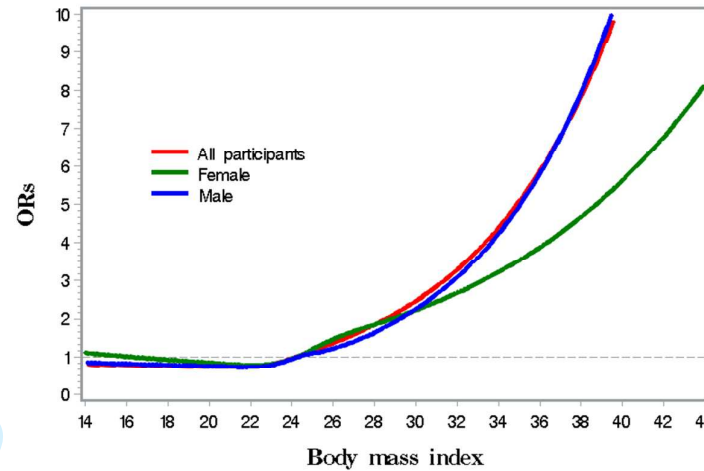

Association between waist circumference and type 2 diabetes



Association between waist circumference and hypertension

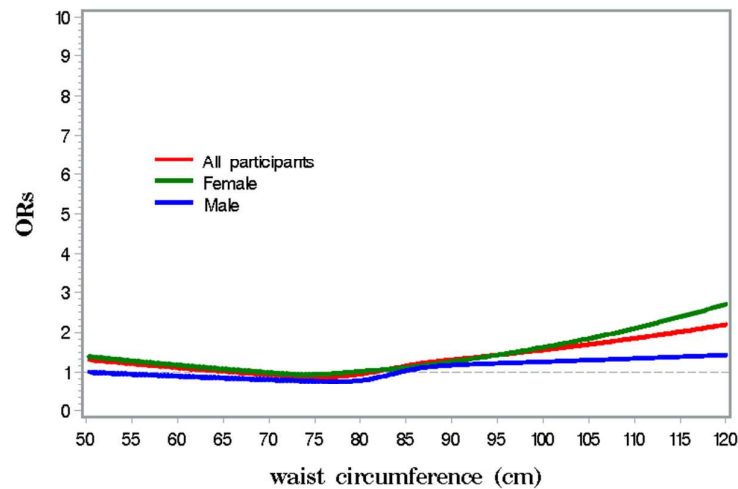

1  
2  
3  
4  
5  
6  
7  
8  
9  
10  
11  
12  
13  
14  
15  
16  
17  
18  
19  
20  
21  
22  
23  
24  
25  
26  
27  
28  
29  
30  
31  
32  
33  
34  
35  
36  
37  
38  
39  
40  
41  
42  
43  
44  
45  
46  
47  
48  
49

For peer review only

STROBE Statement—Checklist of items that should be included in reports of *cross-sectional studies*

|                           | Item No | Recommendation                                                                                                                                                                       | Results of check                                                                                                         |
|---------------------------|---------|--------------------------------------------------------------------------------------------------------------------------------------------------------------------------------------|--------------------------------------------------------------------------------------------------------------------------|
| <b>Title and abstract</b> | 1       | (a) Indicate the study's design with a commonly used term in the title or the abstract                                                                                               | We have indicated that the study was based on two population-based cross-sectional surveys in the title and the abstract |
|                           |         | (b) Provide in the abstract an informative and balanced summary of what was done and what was found                                                                                  | Line 53-62                                                                                                               |
| <b>Introduction</b>       |         |                                                                                                                                                                                      |                                                                                                                          |
| Background/rationale      | 2       | Explain the scientific background and rationale for the investigation being reported                                                                                                 | Line 72-87                                                                                                               |
| Objectives                | 3       | State specific objectives, including any prespecified hypotheses                                                                                                                     | Line 89-92                                                                                                               |
| <b>Methods</b>            |         |                                                                                                                                                                                      |                                                                                                                          |
| Study design              | 4       | Present key elements of study design early in the paper                                                                                                                              | Line 95-104                                                                                                              |
| Setting                   | 5       | Describe the setting, locations, and relevant dates, including periods of recruitment, exposure, follow-up, and data collection                                                      | Line 95-104                                                                                                              |
| Participants              | 6       | (a) Give the eligibility criteria, and the sources and methods of selection of participants                                                                                          | Line 95-104                                                                                                              |
| Variables                 | 7       | Clearly define all outcomes, exposures, predictors, potential confounders, and effect modifiers. Give diagnostic criteria, if applicable                                             | Line 117-153                                                                                                             |
| Data sources/ measurement | 8*      | For each variable of interest, give sources of data and details of methods of assessment (measurement). Describe comparability of assessment methods if there is more than one group | Line 117-153                                                                                                             |
| Bias                      | 9       | Describe any efforts to address potential sources of bias                                                                                                                            | Line 117-153                                                                                                             |
| Study size                | 10      | Explain how the study size was arrived at                                                                                                                                            | NA                                                                                                                       |
| Quantitative variables    | 11      | Explain how quantitative variables were handled in the analyses. If applicable, describe which groupings were chosen and why                                                         | Line 155-169                                                                                                             |
| Statistical methods       | 12      | (a) Describe all statistical methods, including those used to control for confounding                                                                                                | Line 155-169                                                                                                             |
|                           |         | (b) Describe any methods used to                                                                                                                                                     | Line 166-167                                                                                                             |



|                   |     |                                                                                                                                                                                                              |                                                                                      |
|-------------------|-----|--------------------------------------------------------------------------------------------------------------------------------------------------------------------------------------------------------------|--------------------------------------------------------------------------------------|
|                   |     | examine subgroups and interactions                                                                                                                                                                           |                                                                                      |
|                   |     | (c) Explain how missing data were addressed                                                                                                                                                                  | There were very few missing data in this study. Please see footnote of the Table 3   |
|                   |     | (d) If applicable, describe analytical methods taking account of sampling strategy                                                                                                                           |                                                                                      |
|                   |     | (e) Describe any sensitivity analyses                                                                                                                                                                        | No                                                                                   |
| <b>Results</b>    |     |                                                                                                                                                                                                              |                                                                                      |
| Participants      | 13* | (a) Report numbers of individuals at each stage of study—eg numbers potentially eligible, examined for eligibility, confirmed eligible, included in the study, completing follow-up, and analysed            | Line 95-105                                                                          |
|                   |     | (b) Give reasons for non-participation at each stage                                                                                                                                                         | No information                                                                       |
|                   |     | (c) Consider use of a flow diagram                                                                                                                                                                           | No                                                                                   |
| Descriptive data  | 14* | (a) Give characteristics of study participants (eg demographic, clinical, social) and information on exposures and potential confounders                                                                     | Line 172-177, and Table 1                                                            |
|                   |     | (b) Indicate number of participants with missing data for each variable of interest                                                                                                                          | Yes, we provide number of subjects for each variable of interest (Please see tables) |
| Outcome data      | 15* | Report numbers of outcome events or summary measures                                                                                                                                                         | Yes (Please see tables)                                                              |
| Main results      | 16  | (a) Give unadjusted estimates and, if applicable, confounder-adjusted estimates and their precision (eg, 95% confidence interval). Make clear which confounders were adjusted for and why they were included | No. Due to the large table, we present only adjusted ORs                             |
|                   |     | (b) Report category boundaries when continuous variables were categorized                                                                                                                                    | Yes (Please see table 4)                                                             |
|                   |     | (c) If relevant, consider translating estimates of relative risk into absolute risk for a meaningful time period                                                                                             | NA                                                                                   |
| Other analyses    | 17  | Report other analyses done—eg analyses of subgroups and interactions, and sensitivity analyses                                                                                                               | Line 210-217                                                                         |
| <b>Discussion</b> |     |                                                                                                                                                                                                              |                                                                                      |
| Key results       | 18  | Summarise key results with reference to study objectives                                                                                                                                                     | Line 219-224                                                                         |
| Limitations       | 19  | Discuss limitations of the study, taking into account sources of                                                                                                                                             | Line 253-259                                                                         |

|                          |    |                                                                                                                                                                            |              |
|--------------------------|----|----------------------------------------------------------------------------------------------------------------------------------------------------------------------------|--------------|
|                          |    | potential bias or imprecision. Discuss both direction and magnitude of any potential bias                                                                                  |              |
| Interpretation           | 20 | Give a cautious overall interpretation of results considering objectives, limitations, multiplicity of analyses, results from similar studies, and other relevant evidence | Line 251-252 |
| Generalisability         | 21 | Discuss the generalisability (external validity) of the study results                                                                                                      | Line 263-264 |
| <b>Other information</b> |    |                                                                                                                                                                            |              |
| Funding                  | 22 | Give the source of funding and the role of the funders for the present study and, if applicable, for the original study on which the present article is based              | Line 275-280 |

\*Give information separately for exposed and unexposed groups.

**Note:** An Explanation and Elaboration article discusses each checklist item and gives methodological background and published examples of transparent reporting. The STROBE checklist is best used in conjunction with this article (freely available on the Web sites of PLoS Medicine at <http://www.plosmedicine.org/>, Annals of Internal Medicine at <http://www.annals.org/>, and Epidemiology at <http://www.epidem.com/>). Information on the STROBE Initiative is available at [www.strobe-statement.org](http://www.strobe-statement.org).



**Increased Waist Circumference and Prevalence of Type 2  
Diabetes and Hypertension in Chinese Adults: Two  
Population-based Cross-sectional Surveys in Shanghai,  
China**



|                                 |                                                                                                                                                                                                                                                                                                                                                                                                                                                                                                                                                                                                                                                                                                                                                                                                                                                                                                                                                                    |
|---------------------------------|--------------------------------------------------------------------------------------------------------------------------------------------------------------------------------------------------------------------------------------------------------------------------------------------------------------------------------------------------------------------------------------------------------------------------------------------------------------------------------------------------------------------------------------------------------------------------------------------------------------------------------------------------------------------------------------------------------------------------------------------------------------------------------------------------------------------------------------------------------------------------------------------------------------------------------------------------------------------|
| Journal:                        | <i>BMJ Open</i>                                                                                                                                                                                                                                                                                                                                                                                                                                                                                                                                                                                                                                                                                                                                                                                                                                                                                                                                                    |
| Manuscript ID:                  | bmjopen-2013-003408.R2                                                                                                                                                                                                                                                                                                                                                                                                                                                                                                                                                                                                                                                                                                                                                                                                                                                                                                                                             |
| Article Type:                   | Research                                                                                                                                                                                                                                                                                                                                                                                                                                                                                                                                                                                                                                                                                                                                                                                                                                                                                                                                                           |
| Date Submitted by the Author:   | 03-Sep-2013                                                                                                                                                                                                                                                                                                                                                                                                                                                                                                                                                                                                                                                                                                                                                                                                                                                                                                                                                        |
| Complete List of Authors:       | Ruan, Ye; Shanghai Municipal Center for Disease Control and Prevention, Department of Diabetes Prevention and Control<br>Mo, Miao; School of Public Health, Fudan University, Department of Epidemiology<br>Joss-Moore, Lisa; University of Utah, Division of Neonatology<br>Li, Yan Yun; Shanghai Municipal Center for Disease Control and Prevention, Department of Diabetes Prevention and Control<br>Yang, Qun Di; Shanghai Municipal Center for Disease Control and Prevention, Department of Diabetes Prevention and Control<br>Shi, Liang; Shanghai Municipal Center for Disease Control and Prevention, Department of Diabetes Prevention and Control<br>Zhang, Hua; School of Public Health, Fudan University, Department of Epidemiology<br>Li, Rui; Shanghai Municipal Center for Disease Control and Prevention, Department of Diabetes Prevention and Control<br>Xu, Wang Hong; Fudan University, Department of Epidemiology, School of Public Health |
| <b>Primary Subject Heading</b>: | Epidemiology                                                                                                                                                                                                                                                                                                                                                                                                                                                                                                                                                                                                                                                                                                                                                                                                                                                                                                                                                       |
| Secondary Subject Heading:      | Epidemiology, Public health, Cardiovascular medicine, Diabetes and endocrinology                                                                                                                                                                                                                                                                                                                                                                                                                                                                                                                                                                                                                                                                                                                                                                                                                                                                                   |
| Keywords:                       | Hypertension < CARDIOLOGY, General diabetes < DIABETES & ENDOCRINOLOGY, EPIDEMIOLOGY, PUBLIC HEALTH                                                                                                                                                                                                                                                                                                                                                                                                                                                                                                                                                                                                                                                                                                                                                                                                                                                                |
|                                 |                                                                                                                                                                                                                                                                                                                                                                                                                                                                                                                                                                                                                                                                                                                                                                                                                                                                                                                                                                    |

SCHOLARONE™  
Manuscripts

1  
2  
3  
4  
5  
6  
7  
8  
9  
10  
11  
12  
13  
14  
15  
16  
17  
18  
19  
20  
21  
22  
23  
24  
25  
26  
27  
28  
29  
30  
31  
32  
33  
34  
35  
36  
37  
38  
39  
40  
41  
42  
43  
44  
45  
46  
47  
48  
49  
50  
51  
52  
53  
54  
55  
56  
57  
58  
59  
60

1           **Increased Waist Circumference and Prevalence of Type 2 Diabetes and Hypertension in**  
2           **Chinese Adults: Two Population-based Cross-sectional Surveys in Shanghai, China**

4   Ye Ruan, MD, PhD <sup>1</sup>, Miao Mo, MD <sup>2</sup>, Lisa Joss-Moore, PhD <sup>3</sup>, Yan Yun Li, MD <sup>1</sup>, Qun Di Yang,  
5   MD, MPH <sup>1</sup>, Liang Shi, MD <sup>1</sup>, Hua Zhang, MD <sup>2</sup>, Rui Li, MD <sup>1\*</sup>, Wang Hong Xu, MD, PhD <sup>2\*</sup>

7   **AFFILIATIONS:**

8   <sup>1</sup> Department of Diabetes Prevention and Control, Shanghai Municipal Center for Disease Control  
9   and Prevention, 1380 Zhong Shan Xi Road, Shanghai, 200336, People's Republic of China

10   <sup>2</sup> Department of Epidemiology, School of Public Health, Fudan University; Key Laboratory of  
11   Public Health Safety, Ministry of Education (Fudan University), 138 Yi Xue Yuan Road, Shanghai,  
12   200032, People's Republic of China

13   <sup>3</sup> Division of Neonatology, University of Utah, Salt Lake City, Utah 84108, USA

15   **Correspondence to:**

16   Wang Hong Xu, MD, Ph.D,

17   Associate professor

18   Department of Epidemiology

19   School of Public Health

20   Fudan University

21   138 Yi Xue Yuan Road

22   Shanghai 200032

23   P. R. China

24   Tel: 86-21-54237679

25   Fax: 86-21-54237334

26   Email: wanghong.xu@fudan.edu.cn

1  
2 27

3  
4 28 or

5  
6 29 Rui Li, MD

7  
8 30 Department of Diabetes Prevention and Control

9  
10 31 Shanghai Municipal Center for Disease Control and Prevention

11  
12 32 1380 Zhong Shan Xi Road

13  
14 33 Shanghai 200336

15  
16 34 P. R. China

17  
18 35 Tel: 86-21-62758710

19  
20 36 Email: rli@scdc.sh.cn

21  
22 37

23  
24 38 **RUNNING HEADER:** Obesity and prevalence of hypertension and T2DM in Chinese adults

25  
26 39

27  
28 40 **Word Count:**

29  
30 41 Abstract: 249

31  
32 42 Text: 2,658

33  
34 43

35  
36 44

37  
38 45

39  
40 46

41  
42 47

43  
44 48

45  
46 49

47  
48 50

49  
50 51

51  
52 52

53  
54 53

55  
56 54

57  
58 55

59  
60 56

1  
2  
3  
4  
5  
6  
7  
8  
9  
10  
11  
12  
13  
14  
15  
16  
17  
18  
19  
20  
21  
22  
23  
24  
25  
26  
27  
28  
29  
30  
31  
32  
33  
34  
35  
36  
37  
38  
39  
40  
41  
42  
43  
44  
45  
46  
47  
48  
49  
50  
51  
52  
53  
54  
55  
56  
57  
58  
59  
60

44 **Abstract:**

45 **Objective:** To evaluate the changes in body mass index (BMI) and waist circumference (WC)  
46 and their associations with the prevalence of hypertension and type 2 diabetes (T2DM) in Chinese  
47 adults.

48 **Design:** Two consecutive population-based cross-sectional surveys.

49 **Setting:** A total of 12 districts and 7 counties in Shanghai, China.

50 **Participants:** 12,329 randomly selected participants of the survey in 2002-2003, and 7,423  
51 randomly selected participants of the survey in 2009. All subjects were residents of Shanghai aged  
52 35-74 years old.

53 **Outcome measures:** Measured BMI and WC. Previously-diagnosed and newly-identified  
54 hypertension and T2DM by measured blood pressure, fasting and post-load glucose.

55 **Results:** While the participants of the two surveys were comparable in BMI in each age group,  
56 the participants of the 2009 survey had significantly larger WC than those of the 2002-03 survey,  
57 with an annual percentage change (APC) being higher among subjects aged 45-49 years old in both  
58 men and women. The increase in prevalence of T2DM was observed in all age groups and also  
59 appeared more evident in subjects aged 45-49 years old. The prevalence of hypertension was  
60 observed to increase more rapidly in elderly men and middle-aged women. Obesity, both overt and  
61 central, was associated with the risk of the two diseases, but BMI was more strongly linked to  
62 hypertension while WC appeared more evidently related with T2DM.

63 **Conclusion:** The prevalence of central obesity and related chronic diseases has been  
64 increasing in Shanghai, China. Our findings provide useful information for the projection of  
65 growing burden of T2DM and hypertension in Chinese adults.

66  
67 **Keywords:** type 2 diabetes; hypertension; prevalence; body mass index; waist circumference

68

## Article summary

### Article focus

- The shift in BMI and WC among Chinese adults over past one decade.
- The contribution of changes in overall and central obesity to the increasing burden of chronic disease in China.

### Key messages

- The WC increased in Chinese adults over the decade spanning 2002-2009, while BMI did not change over the same period.
- BMI was more strongly linked to hypertension while WC appeared more evidently related with T2DM in Chinese adults.
- Our findings provide useful information for the projection of a growing burden of T2DM and hypertension in Chinese adults.

### Strengths and limitations of this study

- The strengths of this study include the strict process of multistage sampling in adult population of Shanghai, anthropometric measurement according to a standardized protocol and fasting and postprandial blood glucose tests for the participants.
- The nature of the cross-sectional study design limits our ability to directly evaluate the influence of overall and central obesity as well as the change of their prevalence on the risk of hypertension and T2DM.
- The differences in several demographic characteristics between the participants of the two surveys indicate the possibility of selection bias.

69

70

## 71 **Introduction**

72 A rising worldwide prevalence of chronic disease, manifested primarily as hypertension and  
73 type 2 diabetes (T2DM), has been well documented [1-4]. In Chinese aged 15-74 years old, the  
74 prevalence of hypertension increased from 5.11% in 1959, 7.73% in 1979 [5] and 13.58% in 1991[6]  
75 to 17.65% in 2002 [7]. The prevalence of T2DM tripled between 1980 (about 1.0%) and 1996  
76 (3.2%) [8 9], and reached 9.7% in 2008 among adults at 20 years old or above [10]. It is estimated  
77 that over 92 million people in China have T2DM. This represents approximately half of the world's  
78 diabetic population, and places China at the “global epicenter of the diabetes epidemic” [4].

79 Both hypertension and T2DM are associated with obesity [11 12]. Obesity is often measured  
80 by body mass index (BMI). Across the entire range of BMI, the risk of hypertension and T2DM  
81 increases, making a higher BMI a strong predictor of both hypertension and T2DM [4 12-14].  
82 However, a significant proportion of Asian adults diagnosed with T2DM are with the normal BMI,  
83 ie.18.5-25.0 kg/m<sup>2</sup> [15 16]. BMI is a general indicator of overt obesity, but does not give  
84 information about the distribution of obesity. Central obesity, often assessed via waist  
85 circumference (WC), is also strongly correlated with T2DM in both European and Asian adults [11  
86 17]. While changes in BMI have been well documented in China over past several decades [2 18],  
87 changes in WC, and thus central obesity, are not well described.

88 In this study, we took advantage of the data from population based cross-sectional surveys  
89 conducted in Shanghai in 2002-03 and in 2009. We used the data from the two surveys to evaluate  
90 correlations between shifts in BMI and WC with the prevalence of hypertension and T2DM in  
91 Chinese adults. Our results may help to better understand the contribution of overall obesity and  
92 central obesity in the increasing burden of chronic disease in China.

## 93 **Materials and Methods**

### 94 **Study Participants**

95 A representative sample of the general population was randomly selected through a multistage  
96 sampling process in the 2002-03 survey. Firstly, 4 districts and 2 counties were randomly selected



1  
2 97 from a total of 12 districts and 7 counties in Shanghai, China. And then, 1-2 sub-districts or towns  
3  
4 98 were randomly selected from each selected district or county. Next, 1-2 communities or villages,  
5  
6 99 usually 1,000-2,000 residents for each, were randomly selected from each selected sub-district or  
7  
8 100 town. Finally, eligible subjects (permanent residents of Shanghai, 15-74 years old and having been  
9  
10 101 in the city for at least 5 years) were randomly selected from the selected communities and villages  
11  
12 102 and were invited for participation. Pregnant women, individuals with type I diabetes, and physically  
13  
14 103 or mentally disabled persons were excluded from the participation. During the period of May  
15  
16 104 2002-October 2003, a total of 17,526 eligible subjects were recruited, and 14,401 (82.17%)  
17  
18 105 participated the survey.

21 106 The 2009 survey used the similar sampling method except that only 7 communities and  
22  
23 107 villages were randomly selected in the third stage of sampling. The inclusion and exclusion criteria  
24  
25 108 of the 2009 survey were also similar to those for the 2002-03 survey, except that only those at the  
26  
27 109 age of 35-74 years old were eligible for the 2009 survey. Among 7,627 eligible adults contacted  
28  
29 110 during the period of May-July 2009, 7,414 (97.21%) were interviewed and donated blood samples.

32 111 To make the two surveys comparable, we excluded 1,071 subjects younger than 35 years from  
33  
34 112 the 2002-03 survey. After further excluding subjects with missing information, the final analysis  
35  
36 113 included 5,050 men and 7,279 women in the 2002-03 survey and 3,461 men and 3,962 women in  
37  
38 114 the 2009 survey. The Institutional Review Board at Shanghai Municipal Center of Disease Control  
39  
40 115 and Prevention approved the study. Informed consent was obtained from each participant before  
41  
42 116 data collection and laboratory measurements.

#### 46 117 **Data Collection**

48 118 A similar survey approach was followed by the two investigations. In both surveys,  
49  
50 119 information on demographic and socioeconomic factors, diagnosis of diabetes, tobacco and alcohol  
51  
52 120 use, physical activity and family history of diabetes was collected by trained interviewers with a  
53  
54 121 structured questionnaire at community clinics located in the residential areas of the participants.

57 122 At the interview, each participant's blood pressure, body weight, standing height, and waist

1  
2 123 circumference (WC) were measured by trained staff. Blood pressure was measured on the right arm  
3  
4 124 in the sitting position using standard mercury sphygmomanometer after at least 5 minutes of rest.  
5  
6 125 The first and fifth Korotkoff sounds were recorded. Body weight and height were recorded while  
7  
8 126 the subject was in light clothing and without shoes. Body weight was measured with electronic  
9  
10 127 scales to the nearest 0.1 kg. Body height was measured to the nearest 0.1 cm by using a stadiometer.  
11  
12 128 WC, recorded to the nearest 0.1 cm, was taken with a cloth tape and was measured on bare skin at  
13  
14 129 the midline between the lower border of the ribs and the iliac crest in the horizontal plane after a  
15  
16 130 normal expiration. Two measurements were taken and the mean of the replicates was used in the  
17  
18 131 following analyses. Body mass index (BMI) was calculated as weight in kilograms divided by  
19  
20 132 height in meters squared ( $\text{kg/m}^2$ ) using the direct measurements.  
21  
22  
23

### 24 133 **Laboratory Measurements**

25  
26 134 After at least 10 hours of overnight fasting, 1-1.5 ml venous blood specimen was collected in a  
27  
28 135 vacuum tube containing sodium fluoride. All participants with no history of diabetes and having a  
29  
30 136 fasting plasma glucose level of  $< 7.0$  mmol per liter (mmol/l) were then asked to have an oral  
31  
32 137 glucose-tolerance test (OGTT). Blood samples were drawn at 0 and 120 minutes after a standard 75  
33  
34 138 gram glucose load. Plasma glucose was measured with Glucose oxidase-peroxidase (GOD-PAP)  
35  
36 139 method.  
37  
38

### 39 140 **Diagnosis of T2DM and Hypertension**

40  
41 141 Previously diagnosed T2DM and hypertension was identified by a positive response from the  
42  
43 142 participant to the question of “Have you ever diagnosed with T2DM/hypertension by a doctor?” and  
44  
45 143 confirmed by medical records in which prescriptions of anti-hypertensive or hypoglycemic  
46  
47 144 medications were presented. The consistent rate was 100%. For those who had a negative response,  
48  
49 145 the T2DM was diagnosed with measured glucose level by using the 1999 World Health  
50  
51 146 Organization diagnostic criteria [Department of Noncommunicable Disease Surveillance. Definition,  
52  
53 147 diagnosis and classification of diabetes mellitus and its complications: report of a WHO  
54  
55 148 consultation. Part 1. Diagnosis and classification of diabetes mellitus. Geneva: World Health  
56  
57  
58  
59  
60

1  
2 149 Organization, 1999. (Accessed July 5, 2010, at\_  
3  
4 150 [http://www.staff.ncl.ac.uk/philip.home/who\\_dmg.pdf](http://www.staff.ncl.ac.uk/philip.home/who_dmg.pdf).)] and hypertension referred to the subjects  
5  
6 151 with measured systolic blood pressure (SBP)  $\geq$  140 mmHg or diastolic blood pressure (DBP)  $\geq$  90  
7  
8 152 mmHg and confirmed by clinical visits. Total T2DM and hypertension included both previously  
9  
10 153 diagnosed and newly-diagnosed patients. 42.7% (1,110 of 2,598) diabetic patients and 10.3% (694  
11  
12 154 of 6,735) hypertensive patients were newly-diagnosed in the two surveys.

### 155 **Statistical Analysis**

156 SAS software 9.2 was used for all the statistical analyses. Characteristics of the subgroups  
157 were described using summary statistics (median, 25<sup>th</sup> and 75<sup>th</sup> percentile, frequencies, and  
158 percentages) separately for men and women. The differences between two surveys were compared  
159 using  $\chi^2$  test (category variables) and Wilcoxon tests (continuous variables). The annual percentage  
160 changes (APC) in prevalence between two surveys were calculated as (prevalence in 2009 –  
161 prevalence in 2002-03) / number of years using logarithms for each age group. Percentile curves  
162 were constructed for BMI and WC values in the two surveys by gender using the LMS (lambda, mu,  
163 sigma) method. Restricted cubic splines (RCS) were used to model a potential curvilinear  
164 relationship of BMI and WC with hypertension and diabetes using the 5<sup>th</sup>, 25<sup>th</sup>, 75<sup>th</sup> and 95<sup>th</sup>  
165 percentiles as fixed knots and the 50<sup>th</sup> percentile as the reference. Polynomial logistic regression  
166 were used to estimate the odds ratios (OR) and 95% confidence intervals (95% CI) of BMI and WC  
167 with T2DM and hypertension. Meta-analysis was applied to obtain the combined ORs and 95% CI  
168 considering the potential heterogeneity of the populations in the two surveys. The residual method  
169 was used to derive the independent effect of BMI and WC with each other in the models. *P* value  
170 less than 0.05 was considered as a test of significance based on two sides.

### 171 **Results**

172 The male participants in two studies were similar in age, resident site and cigarette smoking  
173 while the female participants were comparable in cigarette smoking (*P* > 0.05) (Table 1). Compared  
174 to the subjects in 2002-03 survey, the participants of 2009 survey, both men and women, had lower

1  
2 175 level of education, higher level of income per capita, more prior history of T2DM, higher frequency  
3  
4 176 of alcohol drinking and lower frequency of leisure time activity, and were more likely to have a  
5  
6 177 family history of diabetes.  
7

8  
9 178 Figure 1 shows the shapes of the BMI and WC distribution curves among men and women  
10  
11 179 changed over the period of the two surveys. After adjusting for age, education, per capita income,  
12  
13 180 resident site, smoking, drinking, regular exercise, and family history of T2DM, the curves of BMI  
14  
15 181 were almost overlapped in both men and women. However, the WC curves for men and women  
16  
17 182 were shifted to the right between 2002-03 and 2009, with the mean WC increasing from 83.6 to  
18  
19 183 85.3 cm for men and from 78.4 to 80.6 cm for women.  
20

21  
22 184 As presented in table 2, the prevalence of obesity, both overall and central, increased with  
23  
24 185 increasing age groups. While the prevalence of overall obesity ( $BMI \geq 28 \text{ kg/m}^2$ ) did not change  
25  
26 186 between two surveys (all  $P$  values  $> 0.05$ ), the prevalence of central obesity was significantly higher  
27  
28 187 in 2009 survey in each age group (all  $P$  values  $< 0.001$ ). A more pronounced increase in the  
29  
30 188 prevalence of central obesity and T2DM was observed among subjects aged 45-49 years old in both  
31  
32 189 men and women; whereas the change in the prevalence of hypertension between two surveys  
33  
34 190 appeared more evident in older men and younger women over the period. Using the World Health  
35  
36 191 Organization (WHO) criteria for obesity did not change the results substantially (data not shown in  
37  
38 192 the tables).  
39

40  
41 193 BMI and WC were highly correlated with each other, with a correlation coefficient of 0.77 ( $P <$   
42  
43 194 0.0001) among men and 0.78 ( $P < 0.0001$ ) among women after adjusting for age. Therefore, the  
44  
45 195 residual method was used to test the potential respective non-linear relationships of BMI and WC  
46  
47 196 with the risk of T2DM and hypertension (Figure 2). The dose-response analysis likewise showed a  
48  
49 197 statistically significant increased risk of T2DM at high level of WC and a significant elevated risk  
50  
51 198 of hypertension at high level of BMI in both men and women after adjusting for age, education, per  
52  
53 199 capita income, resident site, smoking, alcohol consumption, regular exercise, family history of  
54  
55 200 T2DM and phase of surveys, with  $P$  values for non-linear relationship tests  $< 0.05$ . No significant  
56  
57  
58  
59  
60

1  
2 201 relationship was observed between BMI and T2DM in men and between WC and hypertension in  
3  
4 202 women.

5  
6 203 As shown in table 3, in both sexes, BMI adjusted for WC (residuals) appeared more strongly  
7  
8 204 associated with hypertension while WC adjusted for BMI (residuals) was more evidently related  
9  
10 205 with T2DM. Comparing with the lowest quartile of BMI residuals, the risk of hypertension  
11  
12 206 increased 85% (95%CI: 1.59-2.15) in men and 1.23-fold (95%CI: 1.94-2.57) in women, whereas  
13  
14 207 the risk of T2DM did not increase significantly in both sexes. On the other hand, the ORs of the  
15  
16 208 highest versus the lowest quartile WC residuals for T2DM were 1.75 (95%CI: 1.33-2.30) in men  
17  
18 209 and 2.37 (95%CI: 1.78-3.15) in women, higher than the OR of 1.57 (95%CI: 1.35-1.82) in men and  
19  
20 210 1.13 (95%CI: 0.98-1.30) in women for hypertension.

21  
22  
23  
24 211 We further evaluated the potential joint effect of BMI and WC on T2DM and hypertension  
25  
26 212 (table 4). The participants were classified into normal weight (BMI 18.5-23.9 kg/m<sup>2</sup>), overweight  
27  
28 213 (24.0-27.9 kg/m<sup>2</sup>), or obese ( $\geq 28$  kg/m<sup>2</sup>) based on data from Chinese adults, and were defined as  
29  
30 214 with normal or increased WC using sex-specific cut-offs (85 cm in men and 80 cm in women) [19].  
31  
32 215 The risk of T2DM and hypertension increased across groups defined by BMI and WC, with the  
33  
34 216 highest risk observed among men with the lowest BMI but a higher WC, and among those with the  
35  
36 217 highest BMI and a higher WC for hypertension. However, no significant interaction was observed  
37  
38 218 between BMI and WC (all *P* values for interaction tests  $> 0.05$ ).

## 39 40 41 42 219 **Discussion**

43  
44 220 In this representative sample of the adult population in Shanghai, the largest city in China, we  
45  
46 221 observed an increased prevalence of central obesity, hypertension and T2DM over the decade  
47  
48 222 spanning 2002-2009. In contrast, BMI did not change over the same period. Our results present a  
49  
50 223 snapshot of overt versus central obesity in the Chinese population and suggest that the epidemic of  
51  
52 224 central obesity in this population, which has been more closely associated with the prevalence of  
53  
54 225 T2DM, may lead to a more rapidly growing burden of T2DM in China.

55  
56 226 Chinese adults have lower rates of overweight and obesity than their Western counterparts  
57  
58  
59  
60

1  
2 227 using the WHO criteria (BMI  $\geq 25$  kg/m<sup>2</sup> for overweight and BMI  $\geq 30$  kg/m<sup>2</sup> for obesity) [15 16].  
3  
4 228 Nevertheless, increasing trends of BMI in Chinese adults have been well documented [18 20]. In  
5  
6 229 two national nutritional surveys undertaken in 1982 and 1992 in China, the prevalence of  
7  
8 230 overweight/obesity (BMI  $\geq 25$  kg/m<sup>2</sup>) in subjects 20-70 years of age was 10% and 15%,  
9  
10 231 respectively. Between 1992 and 2002, the combined prevalence of overweight and obesity increased  
11  
12 232 from 14.6 to 21.8% [21]. Interestingly, the increase in BMI among Chinese adults has slowed down  
13  
14 233 during past decades [2]. In this study, we did not observe an increase in BMI and prevalence of  
15  
16 234 obesity defined by the Chinese obesity standards or by WHO criteria (data not shown). Instead, we  
17  
18 235 observed a significant increase in WC, a measure of central obesity between surveys. Our  
19  
20 236 observation of increased WC in Chinese adults, without a concomitant increase in BMI, represents  
21  
22 237 an increasing burden of central obesity in this population. The increase in central obesity indicates  
23  
24 238 an upward trend in body fat percentages in the population who have been previously observed with  
25  
26 239 higher body fat percentages compared to other ethnic people with the same BMI [22 23].

30 240 Both epidemics of overall and central obesity parallel a continuously increasing prevalence of  
31  
32 241 hypertension and T2DM in China [21]. Several studies indicate that overall obesity (BMI) is more  
33  
34 242 strongly associated with hypertension, while central obesity (WC) is more strongly associated with  
35  
36 243 T2DM [17 24-26]. The rationale for these associations is based on the notion that central obesity  
37  
38 244 reflects specific accumulation of visceral adipose tissue. Excess visceral adipose tissue is  
39  
40 245 metabolically unfavorable due to productions of free fatty acids and inflammatory mediators.  
41  
42 246 Overall obesity, on the other hand, represents a greater overall physiologic strain and effects  
43  
44 247 vascular and cardiac parameters more significantly. In this study, we observed a significant increase  
45  
46 248 in prevalence of T2DM regardless of gender or age groups, which was more pronounced than the  
47  
48 249 change in the prevalence of hypertension during the period of 2002-03 and 2009. We also observed  
49  
50 250 a closer association of central obesity with the prevalence of T2DM than with the prevalence of  
51  
52 251 hypertension. These results support the notion that central obesity in particular is a stronger risk  
53  
54 252 factor for T2DM than for hypertension in Chinese adults. Due to the cross-sectional design,  
55  
56  
57  
58  
59  
60

1  
2 253 however, our study was unable to make a causal inference.

3  
4 254 The nature of the cross-sectional study design limits our ability to directly evaluate the  
5  
6 255 influence of overall and central obesity as well as the change of their prevalence on the risk of  
7  
8 256 hypertension and T2DM. The differences in several demographic characteristics between the  
9  
10 257 participants of the two surveys indicate the changes in general population over time. However,  
11  
12 258 selection bias could not be excluded. There are several strengths in this study, including the strict  
13  
14 259 process of multistage sampling in adult population in Shanghai, anthropometric measurement  
15  
16 260 according to a standardized protocol and fasting and postprandial blood glucose tests for the  
17  
18 261 participants.  
19  
20

## 21 22 262 **Conclusions**

23  
24 263 In summary, this study describes the potential association of central obesity with an upward  
25  
26 264 trend of T2DM. Our findings provide useful information about the growing burden of type 2  
27  
28 265 diabetes and hypertension in Chinese adults and suggest the need for further study in other rapidly  
29  
30 266 changing populations in China.  
31  
32

## 33 34 267 35 36 268 **Acknowledgements**

37  
38 269 We thank Dr. Xiao-ou Shu and Dr. Hui Cai of Vanderbilt University for their contributions in  
39  
40 270 study design and data analysis. The authors thank the study participants of the two cross-sectional  
41  
42 271 surveys and the healthcare workers in each community involved.  
43  
44

## 45 46 272 **Footnotes**

47  
48  
49 273 **Contributors** YR and MM contributed to data collection, data analysis and draft of the paper.  
50  
51 274 YR, YYL, QDY, and LS contributed to data collection and quality control. LJM contributed to  
52  
53 275 revision of the paper. HZ contributed to data clean and analysis. RL and WHX contributed to study  
54  
55 276 design, statistical analysis and revision of the paper. All authors contributed to the interpretation of  
56  
57 277 data and revision of the manuscript. All authors approved the final version.  
58  
59  
60

1  
2 278 **Funding** This study was supported by the Key Program of Shanghai Municipal Committee of  
3  
4 279 Science and Technology (04 DZ19502), the Shanghai Medical Development Program (01ZD001)  
5  
6 280 and the Shanghai Municipal Health Bureau (GWDTR201204). W. H. Xu was supported by a  
7  
8 281 training grant from the Fogarty International Center (D43 TW008313 to X. O. Shu). The funders  
9  
10 282 had no role in study design, data collection or analysis, decision to publish, or preparation of the  
11  
12 283 manuscript.

13  
14  
15 284 **Conflict of Interest:** None declared.

16  
17 285  
18  
19  
20  
21  
22  
23  
24  
25  
26  
27  
28  
29  
30  
31  
32  
33  
34  
35  
36  
37  
38  
39  
40  
41  
42  
43  
44  
45  
46  
47  
48  
49  
50  
51  
52  
53  
54  
55  
56  
57  
58  
59  
60



## 286 REFERENCES

- 287 1. Kelly T, Yang W, Chen CS, Reynolds K, He J. Global burden of obesity in 2005 and projections to 2030. *Int J Obes*  
288 (Lond) 2008;**32**(9):1431-7 doi: ijo2008102 [pii]  
289 10.1038/ijo.2008.102[published Online First: Epub Date].
- 290 2. Popkin BM. Recent dynamics suggest selected countries catching up to US obesity. *Am J Clin Nutr*  
291 2010;**91**(1):284S-88S doi: ajcn.2009.28473C [pii]  
292 10.3945/ajcn.2009.28473C[published Online First: Epub Date].
- 293 3. Shaw JE, Sicree RA, Zimmet PZ. Global estimates of the prevalence of diabetes for 2010 and 2030. *Diabetes Res*  
294 *Clin Pract* 2010;**87**(1):4-14 doi: S0168-8227(09)00432-X [pii]  
295 10.1016/j.diabres.2009.10.007[published Online First: Epub Date].
- 296 4. Hu FB. Globalization of diabetes: the role of diet, lifestyle, and genes. *Diabetes care* 2011;**34**(6):1249-57 doi:  
297 10.2337/dc11-0442[published Online First: Epub Date].
- 298 5. Wu YK, Lu CQ, Gao RC, Yu JS, Liu GC. Nation-wide hypertension screening in China during 1979-1980. *Chin Med*  
299 *J (Engl)* 1982;**95**(2):101-8
- 300 6. Wu X, Duan X, Gu D, Hao J, Tao S, Fan D. Prevalence of hypertension and its trends in Chinese populations. *Int J*  
301 *Cardiol* 1995;**52**(1):39-44 doi: 016752739502443Z [pii][published Online First: Epub Date].
- 302 7. Wu Y, Huxley R, Li L, et al. Prevalence, awareness, treatment, and control of hypertension in China: data from the  
303 China National Nutrition and Health Survey 2002. *Circulation* 2008;**118**(25):2679-86 doi:  
304 10.1161/CIRCULATIONAHA.108.788166  
305 118/25/2679 [pii][published Online First: Epub Date].
- 306 8. [A mass survey of diabetes mellitus in a population of 300,000 in 14 provinces and municipalities in China (author's  
307 transl)]. *Zhonghua Nei Ke Za Zhi* 1981;**20**(11):678-83
- 308 9. Wang K, Li T, Xiang H. [Study on the epidemiological characteristics of diabetes mellitus and IGT in China].  
309 *Zhonghua Liu Xing Bing Xue Za Zhi* 1998;**19**(5):282-5
- 310 10. Yang W, Lu J, Weng J, et al. Prevalence of diabetes among men and women in China. *The New England journal of*  
311 *medicine* 2010;**362**(12):1090-101 doi: 10.1056/NEJMoa0908292[published Online First: Epub Date].
- 312 11. Nyamdorj R, Qiao Q, Lam TH, et al. BMI compared with central obesity indicators in relation to diabetes and  
313 hypertension in Asians. *Obesity (Silver Spring)* 2008;**16**(7):1622-35 doi: 10.1038/oby.2008.73  
314 oby200873 [pii][published Online First: Epub Date].
- 315 12. Ostchega Y, Hughes JP, Terry A, Fakhouri TH, Miller I. Abdominal obesity, body mass index, and hypertension in  
316 US adults: NHANES 2007-2010. *Am J Hypertens* 2012;**25**(12):1271-8 doi: 10.1038/ajh.2012.120  
317 ajh2012120 [pii][published Online First: Epub Date].
- 318 13. Barrett-Connor E. Epidemiology, obesity, and non-insulin-dependent diabetes mellitus. *Epidemiol Rev*  
319 1989;**11**:172-81
- 320 14. Weber MB, Oza-Frank R, Staimetz LR, Ali MK, Narayan KM. Type 2 diabetes in Asians: prevalence, risk factors,  
321 and effectiveness of behavioral intervention at individual and population levels. *Annu Rev Nutr*  
322 2012;**32**:417-39 doi: 10.1146/annurev-nutr-071811-150630[published Online First: Epub Date].
- 323 15. Lu B, Yang Y, Song X, et al. An evaluation of the International Diabetes Federation definition of metabolic  
324 syndrome in Chinese patients older than 30 years and diagnosed with type 2 diabetes mellitus. *Metabolism*  
325 2006;**55**(8):1088-96 doi: S0026-0495(06)00138-7 [pii]  
326 10.1016/j.metabol.2006.04.003[published Online First: Epub Date].
- 327 16. Tseng CH. Body mass index and waist circumference as determinants of coronary artery disease in Taiwanese adults  
328 with type 2 diabetes mellitus. *Int J Obes (Lond)* 2006;**30**(5):816-21 doi: 0803218 [pii]  
329 10.1038/sj.ijo.0803218[published Online First: Epub Date].
- 330 17. Feng RN, Zhao C, Wang C, et al. BMI is strongly associated with hypertension, and waist circumference is strongly  
331 associated with type 2 diabetes and dyslipidemia, in northern Chinese adults. *Journal of epidemiology / Japan*

- 1  
2 332 Epidemiological Association 2012;**22**(4):317-23
- 3 333 18. Wildman RP, Gu D, Muntner P, et al. Trends in overweight and obesity in Chinese adults: between 1991 and  
4 334 1999-2000. *Obesity (Silver Spring)* 2008;**16**(6):1448-53 doi: oby2008208 [pii]  
5 335 10.1038/oby.2008.208[published Online First: Epub Date]].  
6  
7 336 19. Zhou BF. Predictive values of body mass index and waist circumference for risk factors of certain related diseases in  
8 337 Chinese adults--study on optimal cut-off points of body mass index and waist circumference in Chinese adults.  
9 338 *Biomed Environ Sci* 2002;**15**(1):83-96
- 10 339 20. Wang H, Du S, Zhai F, Popkin BM. Trends in the distribution of body mass index among Chinese adults, aged 20-45  
11 340 years (1989-2000). *Int J Obes (Lond)* 2007;**31**(2):272-8 doi: 0803416 [pii]  
12 341 10.1038/sj.ijo.0803416[published Online First: Epub Date]].
- 13 342 21. Wang Y, Mi J, Shan XY, Wang QJ, Ge KY. Is China facing an obesity epidemic and the consequences? The trends in  
14 343 obesity and chronic disease in China. *Int J Obes (Lond)* 2007;**31**(1):177-88 doi: 0803354 [pii]  
15 344 10.1038/sj.ijo.0803354[published Online First: Epub Date]].
- 16 345 22. Wang J, Thornton JC, Burastero S, et al. Comparisons for body mass index and body fat percent among Puerto  
17 346 Ricans, blacks, whites and Asians living in the New York City area. *Obes Res* 1996;**4**(4):377-84
- 18 347 23. Araneta MR, Wingard DL, Barrett-Connor E. Type 2 diabetes and metabolic syndrome in Filipina-American  
19 348 women : a high-risk nonobese population. *Diabetes Care* 2002;**25**(3):494-9
- 20 349 24. Jacobs EJ, Newton CC, Wang Y, et al. Waist circumference and all-cause mortality in a large US cohort. *Archives of*  
21 350 *internal medicine* 2010;**170**(15):1293-301 doi: 10.1001/archinternmed.2010.201[published Online First: Epub  
22 351 Date]].
- 23 352 25. InterAct C, Langenberg C, Sharp SJ, et al. Long-term risk of incident type 2 diabetes and measures of overall and  
24 353 regional obesity: the EPIC-InterAct case-cohort study. *PLoS medicine* 2012;**9**(6):e1001230 doi:  
25 354 10.1371/journal.pmed.1001230[published Online First: Epub Date]].
- 26 355 26. Li R, Shi L, Jia J, et al. Differentiating the Associations of Waist Circumference and Body Mass Index With  
27 356 Cardiovascular Disease Risk in a Chinese Population. *Asia-Pacific journal of public health / Asia-Pacific*  
28 357 *Academic Consortium for Public Health* 2012 doi: 10.1177/1010539512465306[published Online First: Epub  
29 358 Date]].  
30  
31  
32  
33  
34  
35  
36  
37  
38  
39  
40  
41  
42  
43  
44  
45  
46  
47  
48  
49  
50  
51  
52  
53  
54  
55  
56  
57  
58  
59  
60

1  
2 361 Figure 1. Shift in BMI and WC over the period of the two population-based surveys

3  
4 362 Figure 2. Non-linear dose-response relationship of BMI and WC with hypertension and T2DM

5  
6 363 among participants of the two population-based surveys

7  
8 364  
9  
10  
11  
12  
13  
14  
15  
16  
17  
18  
19  
20  
21  
22  
23  
24  
25  
26  
27  
28  
29  
30  
31  
32  
33  
34  
35  
36  
37  
38  
39  
40  
41  
42  
43  
44  
45  
46  
47  
48  
49  
50  
51  
52  
53  
54  
55  
56  
57  
58  
59  
60

For peer review only

365 Table 1. Characteristics of participants in two population-based surveys in Shanghai, China

| Characteristics                  | 1 <sup>st</sup> survey |                    | 2 <sup>nd</sup> survey |                    | <i>P-value between surveys<sup>a</sup></i> |                 |
|----------------------------------|------------------------|--------------------|------------------------|--------------------|--------------------------------------------|-----------------|
|                                  | Men<br>(N=5,050)       | Women<br>(N=7,279) | Men<br>(N=3,461)       | Women<br>(N=3,962) | <i>In men</i>                              | <i>In women</i> |
| Age (yrs., mean ± SD)            | 54.8 ± 10.8            | 53.1 ± 10.3        | 54.7 ± 9.5             | 54.7 ± 9.1         | 0.55                                       | <0.0001         |
| Resident site (%)                |                        |                    |                        |                    |                                            |                 |
| Urban                            | 71.1                   | 63.0               | 72.4                   | 72.0               |                                            |                 |
| Rural                            | 29.0                   | 37.0               | 27.7                   | 28.0               | 0.19                                       | <0.0001         |
| Education (%)                    |                        |                    |                        |                    |                                            |                 |
| No formal education              | 4.1                    | 18.4               | 3.2                    | 9.5                |                                            |                 |
| Primary school                   | 18.2                   | 23.0               | 14.7                   | 17.7               |                                            |                 |
| Middle school                    | 35.3                   | 31.1               | 45.7                   | 45.2               |                                            |                 |
| High school                      | 27.6                   | 22.6               | 27.6                   | 23.8               |                                            |                 |
| College or above                 | 14.8                   | 4.9                | 8.8                    | 3.9                | 0.0025                                     | <0.0001         |
| Per capita income (yuan/mo.) (%) |                        |                    |                        |                    |                                            |                 |
| <1000                            | 37.0                   | 45.5               | 4.9                    | 4.0                |                                            |                 |
| 1000-2999                        | 38.3                   | 38.4               | 41.8                   | 46.7               |                                            |                 |
| 3000-5000                        | 22.5                   | 17.9               | 33.2                   | 33.3               |                                            |                 |
| >5000                            | 2.2                    | 1.3                | 20.0                   | 16.0               | <0.0001                                    | <0.0001         |
| Family history of type 2diabetes | 12.3                   | 13.1               | 16.4                   | 19.0               | <0.0001                                    | <0.0001         |
| Prevalence of type 2diabetes (%) | 13.6                   | 10.3               | 17.4                   | 14.1               | <0.0001                                    | <0.0001         |
| Prevalence of hypertension (%)   | 34.8                   | 28.3               | 41.8                   | 37.1               | <0.0001                                    | <0.0001         |
| Cigarette smoking (%)            | 61.4                   | 1.7                | 62.6                   | 1.8                | 0.22                                       | 0.93            |
| Alcohol drinking (%)             | 40.4                   | 2.4                | 54.0                   | 5.0                | <0.0001                                    | <0.0001         |
| Leisure-time activity (%)        | 13.3                   | 13.1               | 10.8                   | 9.0                | 0.0009                                     | <0.0001         |

366 <sup>a</sup> *P* for Wilcoxon tests or chi-square tests

Table 2. Prevalence of obesity, hypertension and type 2 diabetes in participants of the two population-based surveys by age groups in Shanghai, China

|                         | No. of subjects        |                        | Overall Obesity        |                        | APC   | Central obesity        |                        | APC  | Hypertension           |                        | APC   | Type 2 diabetes        |                        | APC   |
|-------------------------|------------------------|------------------------|------------------------|------------------------|-------|------------------------|------------------------|------|------------------------|------------------------|-------|------------------------|------------------------|-------|
|                         | 1 <sup>st</sup> survey | 2 <sup>nd</sup> survey | 1 <sup>st</sup> survey | 2 <sup>nd</sup> survey | (%)   | 1 <sup>st</sup> survey | 2 <sup>nd</sup> survey | (%)  | 1 <sup>st</sup> survey | 2 <sup>nd</sup> survey | (%)   | 1 <sup>st</sup> survey | 2 <sup>nd</sup> survey | (%)   |
| Men                     |                        |                        |                        |                        |       |                        |                        |      |                        |                        |       |                        |                        |       |
| Overall                 | 5050                   | 3461                   | 11.7                   | 11.9                   | 0.21  | 46.3                   | 53.8                   | 2.35 | 34.8                   | 41.8                   | 2.87  | 13.6                   | 17.4                   | 3.78  |
| Age-groups              |                        |                        |                        |                        |       |                        |                        |      |                        |                        |       |                        |                        |       |
| 35-                     | 414                    | 230                    | 10.5                   | 9.1                    | -2.11 | 41.8                   | 45.2                   | 1.22 | 15.2                   | 11.7                   | -3.92 | 4.6                    | 5.7                    | 3.25  |
| 40-                     | 574                    | 302                    | 10.0                   | 8.3                    | -2.83 | 41.8                   | 47.00                  | 1.85 | 22.5                   | 21.9                   | -0.43 | 7.8                    | 7.6                    | -0.44 |
| 45-                     | 837                    | 445                    | 12.6                   | 12.6                   | -0.04 | 44.0                   | 53.7                   | 3.12 | 25.3                   | 31.0                   | 3.16  | 7.8                    | 13.7                   | 9.13  |
| 50-                     | 833                    | 739                    | 12.2                   | 10.8                   | -1.76 | 44.1                   | 53.8                   | 3.12 | 33.1                   | 40.3                   | 3.07  | 12.7                   | 18.3                   | 5.72  |
| 55-                     | 628                    | 669                    | 10.4                   | 13.2                   | 3.78  | 47.3                   | 54.6                   | 2.25 | 35.4                   | 45.6                   | 3.99  | 15.0                   | 17.9                   | 2.82  |
| 60-                     | 507                    | 513                    | 10.5                   | 15.4                   | 6.18  | 48.7                   | 56.1                   | 2.19 | 44.6                   | 51.7                   | 2.29  | 15.6                   | 20.1                   | 3.98  |
| 65-                     | 674                    | 313                    | 12.6                   | 11.8                   | -0.99 | 51.4                   | 61.0                   | 2.67 | 49.4                   | 59.4                   | 2.88  | 20.8                   | 26.2                   | 3.64  |
| 70-                     | 583                    | 250                    | 13.8                   | 9.6                    | -5.40 | 51.1                   | 54.0                   | 0.85 | 50.9                   | 65.2                   | 3.87  | 24.2                   | 25.6                   | 0.88  |
| Women                   |                        |                        |                        |                        |       |                        |                        |      |                        |                        |       |                        |                        |       |
| Overall                 | 7279                   | 3962                   | 13.8                   | 13.8                   | 0.02  | 41.7                   | 54.2                   | 4.10 | 28.3                   | 37.1                   | 4.28  | 10.3                   | 14.1                   | 4.84  |
| Age-groups              |                        |                        |                        |                        |       |                        |                        |      |                        |                        |       |                        |                        |       |
| 35-                     | 615                    | 251                    | 7.5                    | 7.2                    | -0.65 | 22.6                   | 26.3                   | 2.35 | 6.8                    | 10.8                   | 7.24  | 3.3                    | 4.0                    | 3.17  |
| 40-                     | 1000                   | 287                    | 9.4                    | 11.2                   | 2.66  | 27.6                   | 38.0                   | 5.05 | 11.7                   | 15.7                   | 4.61  | 4.1                    | 5.9                    | 5.81  |
| 45-                     | 1491                   | 563                    | 11.0                   | 9.8                    | -1.82 | 32.3                   | 42.6                   | 4.38 | 19.3                   | 23.5                   | 3.03  | 5.8                    | 8.7                    | 6.32  |
| 50-                     | 1309                   | 866                    | 15.1                   | 14.1                   | -1.00 | 43.9                   | 54.0                   | 3.24 | 28.7                   | 31.0                   | 1.16  | 8.3                    | 9.4                    | 1.94  |
| 55-                     | 838                    | 818                    | 15.7                   | 13.6                   | -2.17 | 47.5                   | 60.6                   | 3.83 | 33.9                   | 39.7                   | 2.48  | 8.8                    | 15.3                   | 8.80  |
| 60-                     | 610                    | 585                    | 19.2                   | 18.1                   | -0.87 | 53.5                   | 63.1                   | 2.58 | 40.5                   | 52.8                   | 4.17  | 16.7                   | 19.2                   | 2.11  |
| 65-                     | 799                    | 327                    | 18.0                   | 18.4                   | 0.28  | 59.0                   | 66.1                   | 1.76 | 48.4                   | 59.3                   | 3.17  | 23.7                   | 27.8                   | 2.54  |
| 70-                     | 617                    | 265                    | 18.2                   | 16.6                   | -1.36 | 60.2                   | 68.7                   | 2.05 | 51.4                   | 64.5                   | 3.57  | 21.4                   | 27.2                   | 3.75  |
| All subjects            |                        |                        |                        |                        |       |                        |                        |      |                        |                        |       |                        |                        |       |
| Overall                 | 12329                  | 7423                   | 13.0                   | 12.9                   | -0.05 | 43.6                   | 54.0                   | 3.35 | 31.0                   | 39.3                   | 3.75  | 11.7                   | 15.6                   | 4.53  |
| Age-groups <sup>a</sup> |                        |                        |                        |                        |       |                        |                        |      |                        |                        |       |                        |                        |       |
| 35-                     | 1029                   | 481                    | 8.7                    | 8.0                    | -1.04 | 30.3                   | 33.9                   | 2.39 | 10.2                   | 11.2                   | 1.49  | 3.8                    | 4.7                    | 3.63  |
| 40-                     | 1574                   | 589                    | 9.6                    | 10.1                   | 0.11  | 32.7                   | 41.3                   | 4.14 | 15.6                   | 17.9                   | 2.92  | 5.5                    | 6.5                    | 3.41  |
| 45-                     | 2328                   | 1008                   | 11.6                   | 10.8                   | -0.77 | 36.5                   | 46.6                   | 4.16 | 21.5                   | 26.2                   | 3.46  | 6.5                    | 10.5                   | 8.22  |
| 50-                     | 2142                   | 1605                   | 13.9                   | 12.8                   | -1.53 | 44.0                   | 53.9                   | 3.19 | 30.4                   | 34.6                   | 0.90  | 10.0                   | 12.8                   | 4.69  |
| 55-                     | 1466                   | 1487                   | 13.4                   | 13.4                   | 0.01  | 47.4                   | 58.1                   | 3.13 | 34.5                   | 42.2                   | 3.20  | 11.5                   | 16.4                   | 5.75  |
| 60-                     | 1117                   | 1098                   | 15.2                   | 16.9                   | 1.59  | 51.3                   | 59.9                   | 2.39 | 42.4                   | 52.3                   | 3.29  | 16.2                   | 19.6                   | 2.96  |
| 65-                     | 1473                   | 640                    | 15.6                   | 15.4                   | -0.39 | 55.5                   | 63.8                   | 2.11 | 48.9                   | 59.4                   | 3.04  | 22.3                   | 27.1                   | 2.98  |
| 70-                     | 1200                   | 515                    | 16.0                   | 13.2                   | -2.94 | 55.8                   | 61.5                   | 1.52 | 51.2                   | 64.9                   | 3.71  | 22.8                   | 26.4                   | 2.32  |

<sup>a</sup> adjusted for sex according to the distribution in the first survey.

Table 3. Association of body size with hypertension and type 2 diabetes in two population-based surveys in Shanghai, China

|                      | No. of subjects with neither diseases | Type 2 diabetes only |                   | Hypertension only |                   | Both              |                  |
|----------------------|---------------------------------------|----------------------|-------------------|-------------------|-------------------|-------------------|------------------|
|                      |                                       | N                    | OR (95%CI)        | N                 | OR (95%CI)        | N                 | OR (95%CI)       |
| <b>BMI residuals</b> |                                       |                      |                   |                   |                   |                   |                  |
| Men                  |                                       |                      |                   |                   |                   |                   |                  |
| Q1                   | 1260                                  | 156                  | 1.00              | 529               | 1.00              | 175               | 1.00             |
| Q2                   | 1224                                  | 142                  | 0.99 (0.77, 1.27) | 583               | 1.16 (1.00, 1.34) | 172               | 1.11(0.87, 1.41) |
| Q3                   | 1164                                  | 132                  | 1.09 (0.84, 1.41) | 651               | 1.50 (1.29, 1.74) | 171               | 1.36(1.07, 1.73) |
| Q4                   | 1079                                  | 123                  | 1.16 (0.88, 1.51) | 709               | 1.85 (1.59, 2.15) | 207               | 1.95(1.54, 2.47) |
|                      | <i>P for trend</i>                    |                      | 0.2472            | <i>&lt;0.0001</i> |                   | <i>&lt;0.0001</i> |                  |
| Women                |                                       |                      |                   |                   |                   |                   |                  |
| Q1                   | 1816                                  | 166                  | 1.00              | 600               | 1.00              | 223               | 1.00             |
| Q2                   | 1866                                  | 148                  | 1.02 (0.80, 1.29) | 629               | 1.29 (1.12, 1.48) | 162               | 0.96(0.77, 1.21) |
| Q3                   | 1835                                  | 125                  | 0.89 (0.69, 1.15) | 687               | 1.51 (1.31, 1.73) | 158               | 1.03(0.82, 1.31) |
| Q4                   | 1634                                  | 109                  | 0.94 (0.73, 1.23) | 847               | 2.23 (1.94, 2.57) | 215               | 1.85(1.15, 2.98) |
|                      | <i>P for trend</i>                    |                      | 0.4864            | <i>&lt;0.0001</i> |                   | 0.0067            |                  |
| All subjects         |                                       |                      |                   |                   |                   |                   |                  |
| Q1                   | 3048                                  | 330                  | 1.00              | 1162              | 1.00              | 385               | 1.00             |
| Q2                   | 3079                                  | 282                  | 1.00 (0.84, 1.19) | 1200              | 1.22 (1.11, 1.35) | 363               | 1.03(0.87, 1.22) |
| Q3                   | 2998                                  | 278                  | 0.98 (0.82, 1.18) | 1346              | 1.50 (1.36, 1.67) | 302               | 1.18(1.00, 1.40) |
| Q4                   | 2753                                  | 211                  | 1.04 (0.86, 1.26) | 1527              | 2.05 (1.85, 2.27) | 433               | 1.88(1.60, 2.21) |
|                      | <i>P for trend</i>                    |                      | 0.2280            | <i>&lt;0.0001</i> |                   | <i>&lt;0.0001</i> |                  |
| <b>WC residuals</b>  |                                       |                      |                   |                   |                   |                   |                  |
| Men                  |                                       |                      |                   |                   |                   |                   |                  |
| Q1                   | 1376                                  | 102                  | 1.00              | 531               | 1.00              | 111               | 1.00             |
| Q2                   | 1232                                  | 131                  | 1.34 (1.02, 1.78) | 601               | 1.23 (1.06, 1.42) | 155               | 1.41(1.07, 1.84) |
| Q3                   | 1130                                  | 148                  | 1.39 (0.70, 2.77) | 644               | 1.39 (1.20, 1.62) | 197               | 1.73(1.33, 2.25) |
| Q4                   | 989                                   | 172                  | 1.75 (1.33, 2.30) | 696               | 1.57 (1.35, 1.82) | 262               | 2.25(1.74, 2.90) |
|                      | <i>P for trend</i>                    |                      | <i>&lt;0.0001</i> | <i>&lt;0.0001</i> |                   | <i>&lt;0.0001</i> |                  |
| Women                |                                       |                      |                   |                   |                   |                   |                  |
| Q1                   | 2019                                  | 80                   | 1.00              | 598               | 1.00              | 108               | 1.00             |
| Q2                   | 1935                                  | 102                  | 1.17 (0.86, 1.59) | 651               | 1.04 (0.91, 1.18) | 117               | 0.94(0.71, 1.25) |
| Q3                   | 1708                                  | 172                  | 2.04 (1.54, 2.70) | 732               | 1.14 (0.99, 1.30) | 194               | 1.40(1.08, 1.82) |
| Q4                   | 1489                                  | 194                  | 2.37 (1.78, 3.15) | 782               | 1.13 (0.98, 1.30) | 339               | 2.06(1.26, 3.38) |
|                      | <i>P for trend</i>                    |                      | <i>&lt;0.0001</i> | 0.0216            |                   | <i>&lt;0.0001</i> |                  |
| All subjects         |                                       |                      |                   |                   |                   |                   |                  |
| Q1                   | 3453                                  | 161                  | 1.00              | 1109              | 1.00              | 203               | 1.00             |
| Q2                   | 3192                                  | 260                  | 1.26 (0.99, 1.60) | 1211              | 1.12 (1.01, 1.23) | 260               | 1.16(0.82, 1.62) |
| Q3                   | 2838                                  | 301                  | 1.66 (1.16, 2.36) | 1373              | 1.25 (1.13, 1.38) | 412               | 1.55(1.29, 1.87) |
| Q4                   | 2395                                  | 379                  | 2.03 (1.66, 2.47) | 1542              | 1.34 (1.09, 1.64) | 608               | 2.18(1.83, 2.61) |
|                      | <i>P for trend</i>                    |                      | 0.0001            | 0.0021            |                   | <i>&lt;0.0001</i> |                  |

Missing value excluded from the analysis.

OR: Adjusted for age (continuous variable), education (no formal education, primary school, middle school, high school, colleague or above, dummy variables), per capita income (<1000, 1000-2999, 3000-5000 and >5000 RMB Yuan / month, dummy variables), resident site (urban/rural area), family history of type 2 diabetes (yes/no), smoking (ever/never), alcohol drinking (ever/never), regular exercise (never/ever), phase of study (first /second survey); Additionally adjusted for sex (male/female) for all subjects.

1 Table 4. Joint effect of general obesity and central obesity on type 2 diabetes among Chinese adults

| BMI                      | WC: Lower       |                    |                | WC: Higher      |                    |                | OR (95%CI) for hypertension |                   | OR (95%CI) for type 2 diabetes |                   |
|--------------------------|-----------------|--------------------|----------------|-----------------|--------------------|----------------|-----------------------------|-------------------|--------------------------------|-------------------|
|                          | No. of subjects | Hypertension N (%) | Diabetes N (%) | No. of subjects | Hypertension N (%) | Diabetes N (%) | WC: Lower                   | WC: Higher        | WC: Lower                      | WC: Higher        |
| <b>Men</b>               |                 |                    |                |                 |                    |                |                             |                   |                                |                   |
| <18.5                    | 212             | 36                 | 20             | 16              | 10                 | 6              | 0.61(0.42, 0.89)            | 3.68(1.28, 10.59) | 1.02(0.62, 1.67)               | 3.77(1.13, 12.56) |
| 18.5-23.9                | 3034            | 767                | 296            | 679             | 249                | 111            | 1.00                        | 1.56(0.94, 2.57)  | 1.00                           | 1.48(1.15, 1.90)  |
| 24.0-27.9                | 1010            | 356                | 134            | 2530            | 1179               | 483            | 1.61(1.13, 2.32)            | 2.38(1.78, 3.17)  | 1.46(1.16, 1.83)               | 1.85(1.16, 2.96)  |
| ≥28.0                    | 36              | 20                 | 4              | 960             | 580                | 224            | 3.91(1.95, 7.82)            | 4.67(3.97, 5.49)  | 1.71(0.55, 5.37)               | 2.60(2.12, 3.18)  |
| <i>P for interaction</i> |                 |                    |                |                 |                    |                | <i>0.0711</i>               |                   | <i>0.0933</i>                  |                   |
| <b>Women</b>             |                 |                    |                |                 |                    |                |                             |                   |                                |                   |
| <18.5                    | 313             | 51                 | 19             | 8               | 2                  | 1              | 0.68(0.49, 0.94)            | 0.85(0.16, 4.51)  | 0.93(0.56, 1.54)               | 2.45(0.22, 26.72) |
| 18.5-23.9                | 4323            | 821                | 265            | 974             | 314                | 165            | 1.00                        | 1.48(1.26, 1.75)  | 1.00                           | 2.36(1.89, 2.94)  |
| 24.0-27.9                | 1330            | 384                | 93             | 2724            | 1102               | 437            | 1.84(1.59, 2.14)            | 2.21(1.97, 2.49)  | 1.19(0.92, 1.53)               | 2.14(1.81, 2.54)  |
| ≥28.0                    | 81              | 32                 | 9              | 1467            | 815                | 317            | 3.10(1.93, 5.00)            | 4.33(3.77, 4.96)  | 2.14(1.01, 4.52)               | 3.08(2.56, 3.71)  |
| <i>P for interaction</i> |                 |                    |                |                 |                    |                | <i>0.3524</i>               |                   | <i>0.4011</i>                  |                   |
| <b>Total</b>             |                 |                    |                |                 |                    |                |                             |                   |                                |                   |
| <18.5                    | 525             | 87                 | 39             | 24              | 12                 | 7              | 0.65(0.51, 0.83)            | 2.25(0.85, 5.93)  | 0.97(0.68, 1.39)               | 3.45(1.18, 10.12) |
| 18.5-23.9                | 7357            | 1588               | 561            | 1653            | 563                | 276            | 1.00                        | 1.52(1.25, 1.85)  | 1.00                           | 1.88(1.42, 2.49)  |
| 24.0-27.9                | 2340            | 740                | 227            | 5254            | 2281               | 920            | 1.74(1.50, 2.03)            | 2.31(2.03, 2.62)  | 1.33(1.12, 1.58)               | 1.99(1.62, 2.45)  |
| ≥28.0                    | 117             | 5                  | 13             | 2427            | 1395               | 541            | 3.34(2.26, 4.94)            | 4.46(4.02, 4.96)  | 2.00(1.07, 3.74)               | 2.85(2.49, 3.27)  |
| <i>P for interaction</i> |                 |                    |                |                 |                    |                | <i>0.0562</i>               |                   | <i>0.0798</i>                  |                   |

2 Higher WC defined as ≥ 85 cm for men and ≥ 80 cm for women

3 OR: Adjusted for age (continuous variable), education (no formal education, primary school, middle school, high school, colleague or above, dummy variables), per capita  
4 income (<1000, 1000-2999, 3000-5000 and >5000 RMB Yuan / month, dummy variables), resident site (urban/rural area), family history of type 2 diabetes (yes/no),  
5 smoking (ever/never), alcohol drinking (ever/never), regular exercise (never/ever), and phase of study (first /second survey).

1  
2  
3  
4  
5  
6  
7  
8  
9  
10  
11  
12  
13  
14  
15  
16  
17  
18  
19  
20  
21  
22  
23  
24  
25  
26  
27  
28  
29  
30  
31  
32  
33  
34  
35  
36  
37  
38  
39  
40  
41  
42  
43  
44  
45  
46  
47  
48  
49

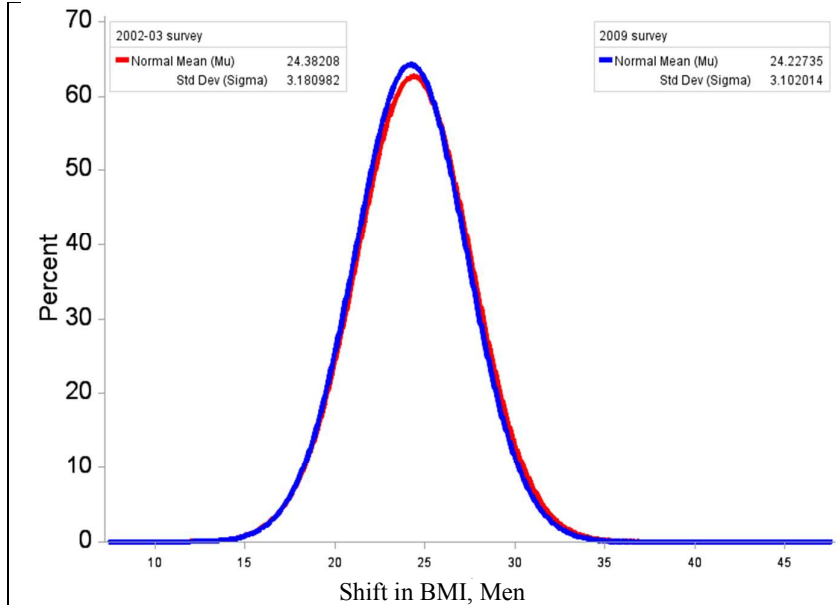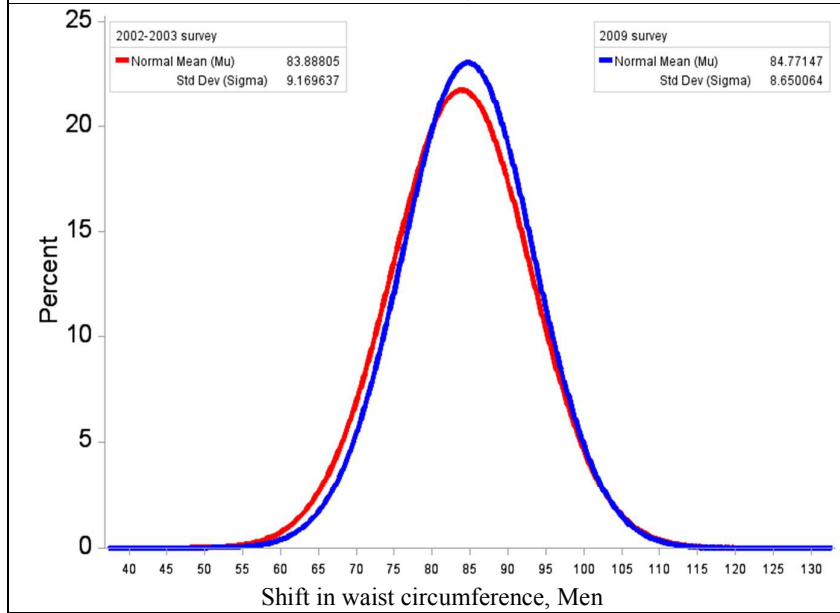



1  
2  
3  
4  
5  
6  
7  
8  
9  
10  
11  
12  
13  
14  
15  
16  
17  
18  
19  
20  
21  
22  
23  
24  
25  
26  
27  
28  
29  
30  
31  
32  
33  
34  
35  
36  
37  
38  
39  
40  
41  
42  
43  
44  
45  
46  
47  
48  
49

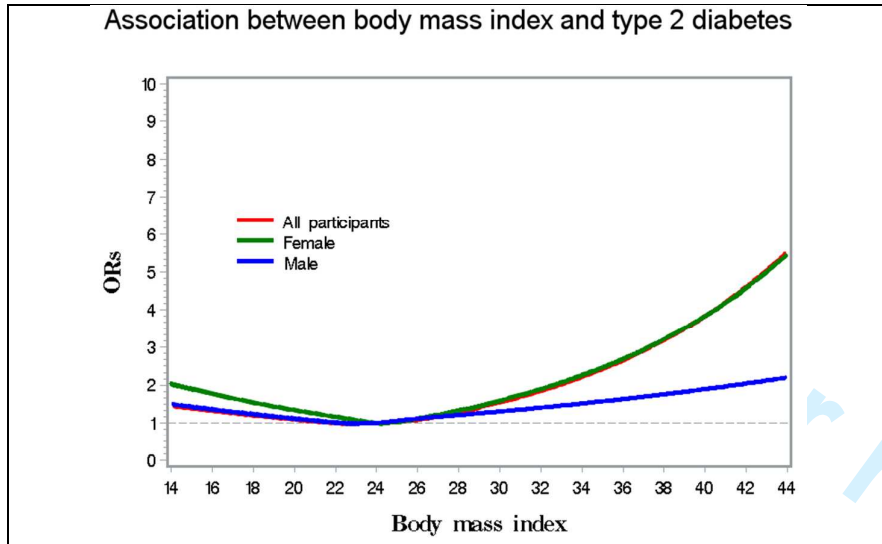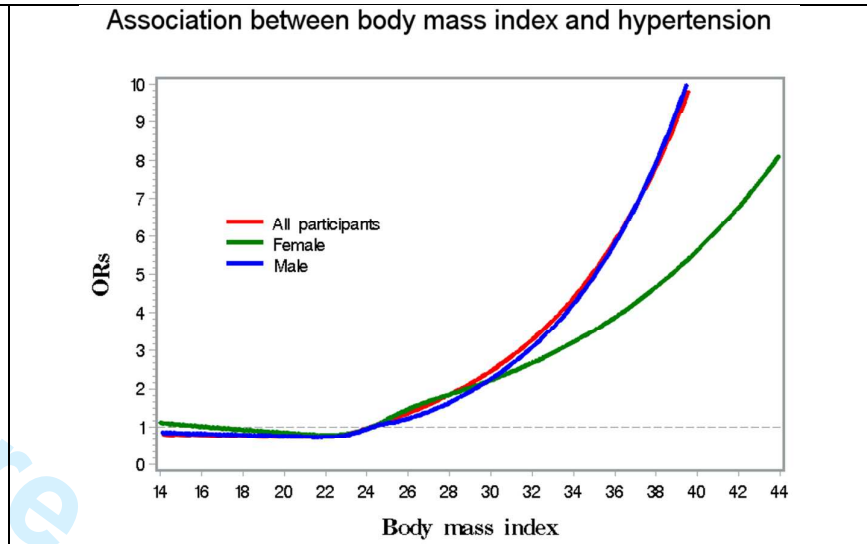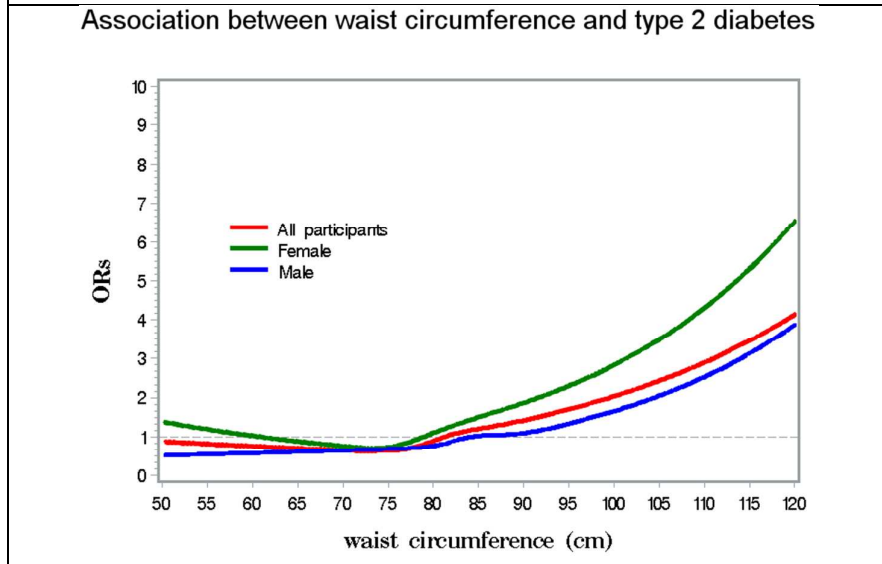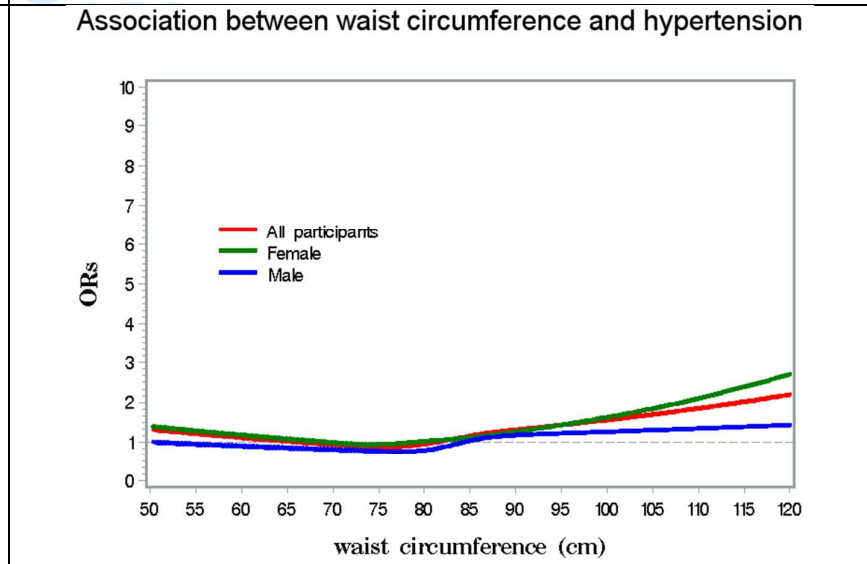

1  
2  
3  
4  
5  
6  
7  
8  
9  
10  
11  
12  
13  
14  
15  
16  
17  
18  
19  
20  
21  
22  
23  
24  
25  
26  
27  
28  
29  
30  
31  
32  
33  
34  
35  
36  
37  
38  
39  
40  
41  
42  
43  
44  
45  
46  
47  
48  
49

For peer review only

STROBE Statement—Checklist of items that should be included in reports of *cross-sectional studies*

|                           | Item No | Recommendation                                                                                                                                                                       | Results of check                                                                                                         |
|---------------------------|---------|--------------------------------------------------------------------------------------------------------------------------------------------------------------------------------------|--------------------------------------------------------------------------------------------------------------------------|
| <b>Title and abstract</b> | 1       | (a) Indicate the study's design with a commonly used term in the title or the abstract                                                                                               | We have indicated that the study was based on two population-based cross-sectional surveys in the title and the abstract |
|                           |         | (b) Provide in the abstract an informative and balanced summary of what was done and what was found                                                                                  | Line 53-62                                                                                                               |
| <b>Introduction</b>       |         |                                                                                                                                                                                      |                                                                                                                          |
| Background/rationale      | 2       | Explain the scientific background and rationale for the investigation being reported                                                                                                 | Line 72-87                                                                                                               |
| Objectives                | 3       | State specific objectives, including any prespecified hypotheses                                                                                                                     | Line 89-92                                                                                                               |
| <b>Methods</b>            |         |                                                                                                                                                                                      |                                                                                                                          |
| Study design              | 4       | Present key elements of study design early in the paper                                                                                                                              | Line 95-104                                                                                                              |
| Setting                   | 5       | Describe the setting, locations, and relevant dates, including periods of recruitment, exposure, follow-up, and data collection                                                      | Line 95-104                                                                                                              |
| Participants              | 6       | (a) Give the eligibility criteria, and the sources and methods of selection of participants                                                                                          | Line 95-104                                                                                                              |
| Variables                 | 7       | Clearly define all outcomes, exposures, predictors, potential confounders, and effect modifiers. Give diagnostic criteria, if applicable                                             | Line 117-153                                                                                                             |
| Data sources/ measurement | 8*      | For each variable of interest, give sources of data and details of methods of assessment (measurement). Describe comparability of assessment methods if there is more than one group | Line 117-153                                                                                                             |
| Bias                      | 9       | Describe any efforts to address potential sources of bias                                                                                                                            | Line 117-153                                                                                                             |
| Study size                | 10      | Explain how the study size was arrived at                                                                                                                                            | NA                                                                                                                       |
| Quantitative variables    | 11      | Explain how quantitative variables were handled in the analyses. If applicable, describe which groupings were chosen and why                                                         | Line 155-169                                                                                                             |
| Statistical methods       | 12      | (a) Describe all statistical methods, including those used to control for confounding                                                                                                | Line 155-169                                                                                                             |
|                           |         | (b) Describe any methods used to                                                                                                                                                     | Line 166-167                                                                                                             |

|                   |     |                                                                                                                                                                                                              |                                                                                      |
|-------------------|-----|--------------------------------------------------------------------------------------------------------------------------------------------------------------------------------------------------------------|--------------------------------------------------------------------------------------|
|                   |     | examine subgroups and interactions                                                                                                                                                                           |                                                                                      |
|                   |     | (c) Explain how missing data were addressed                                                                                                                                                                  | There were very few missing data in this study. Please see footnote of the Table 3   |
|                   |     | (d) If applicable, describe analytical methods taking account of sampling strategy                                                                                                                           |                                                                                      |
|                   |     | (e) Describe any sensitivity analyses                                                                                                                                                                        | No                                                                                   |
| <b>Results</b>    |     |                                                                                                                                                                                                              |                                                                                      |
| Participants      | 13* | (a) Report numbers of individuals at each stage of study—eg numbers potentially eligible, examined for eligibility, confirmed eligible, included in the study, completing follow-up, and analysed            | Line 95-105                                                                          |
|                   |     | (b) Give reasons for non-participation at each stage                                                                                                                                                         | No information                                                                       |
|                   |     | (c) Consider use of a flow diagram                                                                                                                                                                           | No                                                                                   |
| Descriptive data  | 14* | (a) Give characteristics of study participants (eg demographic, clinical, social) and information on exposures and potential confounders                                                                     | Line 172-177, and Table 1                                                            |
|                   |     | (b) Indicate number of participants with missing data for each variable of interest                                                                                                                          | Yes, we provide number of subjects for each variable of interest (Please see tables) |
| Outcome data      | 15* | Report numbers of outcome events or summary measures                                                                                                                                                         | Yes (Please see tables)                                                              |
| Main results      | 16  | (a) Give unadjusted estimates and, if applicable, confounder-adjusted estimates and their precision (eg, 95% confidence interval). Make clear which confounders were adjusted for and why they were included | No. Due to the large table, we present only adjusted ORs                             |
|                   |     | (b) Report category boundaries when continuous variables were categorized                                                                                                                                    | Yes (Please see table 4)                                                             |
|                   |     | (c) If relevant, consider translating estimates of relative risk into absolute risk for a meaningful time period                                                                                             | NA                                                                                   |
| Other analyses    | 17  | Report other analyses done—eg analyses of subgroups and interactions, and sensitivity analyses                                                                                                               | Line 210-217                                                                         |
| <b>Discussion</b> |     |                                                                                                                                                                                                              |                                                                                      |
| Key results       | 18  | Summarise key results with reference to study objectives                                                                                                                                                     | Line 219-224                                                                         |
| Limitations       | 19  | Discuss limitations of the study, taking into account sources of                                                                                                                                             | Line 253-259                                                                         |

|                          |    |                                                                                                                                                                            |              |
|--------------------------|----|----------------------------------------------------------------------------------------------------------------------------------------------------------------------------|--------------|
|                          |    | potential bias or imprecision. Discuss both direction and magnitude of any potential bias                                                                                  |              |
| Interpretation           | 20 | Give a cautious overall interpretation of results considering objectives, limitations, multiplicity of analyses, results from similar studies, and other relevant evidence | Line 251-252 |
| Generalisability         | 21 | Discuss the generalisability (external validity) of the study results                                                                                                      | Line 263-264 |
| <b>Other information</b> |    |                                                                                                                                                                            |              |
| Funding                  | 22 | Give the source of funding and the role of the funders for the present study and, if applicable, for the original study on which the present article is based              | Line 275-280 |

\*Give information separately for exposed and unexposed groups.

**Note:** An Explanation and Elaboration article discusses each checklist item and gives methodological background and published examples of transparent reporting. The STROBE checklist is best used in conjunction with this article (freely available on the Web sites of PLoS Medicine at <http://www.plosmedicine.org/>, Annals of Internal Medicine at <http://www.annals.org/>, and Epidemiology at <http://www.epidem.com/>). Information on the STROBE Initiative is available at [www.strobe-statement.org](http://www.strobe-statement.org).

1  
2  
3  
4  
5  
6  
7  
8  
9  
10  
11  
12  
13  
14  
15  
16  
17  
18  
19  
20  
21  
22  
23  
24  
25  
26  
27  
28  
29  
30  
31  
32  
33  
34  
35  
36  
37  
38  
39  
40  
41  
42  
43  
44  
45  
46  
47  
48  
49  
50  
51  
52  
53  
54  
55  
56  
57  
58  
59  
60

1           **Increased Waist Circumference and Prevalence of Type 2 Diabetes and Hypertension in**  
2           **Chinese Adults: Two Population-based Cross-sectional Surveys in Shanghai, China**

3  
4   Ye Ruan, MD, PhD <sup>1</sup>, Miao Mo, MD <sup>2</sup>, Lisa Joss-Moore, PhD <sup>3</sup>, Yan Yun Li, MD <sup>1</sup>, Qun Di Yang,  
5   MD, MPH <sup>1</sup>, Liang Shi, MD <sup>1</sup>, Hua Zhang, MD <sup>2</sup>, Rui Li, MD <sup>1\*</sup>, Wang Hong Xu, MD, PhD <sup>2\*</sup>  
6

7   **AFFILIATIONS:**

8   <sup>1</sup> Department of Diabetes Prevention and Control, Shanghai Municipal Center for Disease Control  
9   and Prevention, 1380 Zhong Shan Xi Road, Shanghai, 200336, People's Republic of China

10   <sup>2</sup> Department of Epidemiology, School of Public Health, Fudan University; Key Laboratory of  
11   Public Health Safety, Ministry of Education (Fudan University), 138 Yi Xue Yuan Road, Shanghai,  
12   200032, People's Republic of China

13   <sup>3</sup> Division of Neonatology, University of Utah, Salt Lake City, Utah 84108, USA

14  
15   **Correspondence to:**

16   Wang Hong Xu, MD, Ph.D,

17   Associate professor

18   Department of Epidemiology

19   School of Public Health

20   Fudan University

21   138 Yi Xue Yuan Road

22   Shanghai 200032

23   P. R. China

24   Tel: 86-21-54237679

25   Fax: 86-21-54237334

26   Email: wanghong.xu@fudan.edu.cn

1  
2 27

3  
4 or

5  
6 Rui Li, MD

7  
8 Department of Diabetes Prevention and Control

9  
10 Shanghai Municipal Center for Disease Control and Prevention

11  
12 1380 Zhong Shan Xi Road

13  
14 Shanghai 200336

15  
16 P. R. China

17  
18 Tel: 86-21-62758710

19  
20 Email: rli@scdc.sh.cn

21  
22  
23  
24  
25  
26  
27  
28  
29  
30  
31  
32  
33  
34  
35  
36  
37  
38  
39  
40  
41  
42  
43  
44  
45  
46  
47  
48  
49  
50  
51  
52  
53  
54  
55  
56  
57  
58  
59  
60

**RUNNING HEADER:** Obesity and prevalence of hypertension and T2DM in Chinese adults

**Word Count:**

Abstract: 249

Text: 2,658

1  
2  
3  
44 **Abstract:**

45 **Objective:** To evaluate the changes in body mass index (BMI) and waist circumference (WC)  
46 and their associations with the prevalence of hypertension and type 2 diabetes (T2DM) in Chinese  
47 adults.

48 **Design:** Two consecutive population-based cross-sectional surveys.

49 **Setting:** A total of 12 districts and 7 counties in Shanghai, China.

50 **Participants:** 12,329 randomly selected participants of the survey in 2002-2003, and 7,423  
51 randomly selected participants of the survey in 2009. All subjects were residents of Shanghai aged  
52 35-74 years old.

53 **Outcome measures:** Measured BMI and WC. Previously-diagnosed and newly-identified  
54 hypertension and T2DM by measured blood pressure, fasting and post-load glucose.

55 **Results:** While the participants of the two surveys were comparable in BMI in each age group,  
56 the participants of the 2009 survey had significantly larger WC than those of the 2002-03 survey,  
57 with an annual percentage change (APC) being higher among subjects aged 45-49 years old in both  
58 men and women. The increase in prevalence of T2DM was observed in all age groups and also  
59 appeared more evident in subjects aged 45-49 years old. The prevalence of hypertension was  
60 observed to increase more rapidly in elderly men and middle-aged women. Obesity, both overt and  
61 central, was associated with the risk of the two diseases, but BMI was more strongly linked to  
62 hypertension while WC appeared more evidently related with T2DM.

63 **Conclusion:** The prevalence of central obesity and related chronic diseases has been  
64 increasing in Shanghai, China. Our findings provide useful information for the projection of  
65 growing burden of T2DM and hypertension in Chinese adults.

66  
67 **Keywords:** type 2 diabetes; hypertension; prevalence; body mass index; waist circumference



68

## Article summary

### Article focus

- The shift in BMI and WC among Chinese adults over past one decade.
- The contribution of changes in overall and central obesity to the increasing burden of chronic disease in China.

### Key messages

- The WC increased in Chinese adults over the decade spanning 2002-2009, while BMI did not change over the same period.
- BMI was more strongly linked to hypertension while WC appeared more evidently related with T2DM in Chinese adults.
- Our findings provide useful information for the projection of a growing burden of T2DM and hypertension in Chinese adults.

### Strengths and limitations of this study

- The strengths of this study include the strict process of multistage sampling in adult population of Shanghai, anthropometric measurement according to a standardized protocol and fasting and postprandial blood glucose tests for the participants.
- The nature of the cross-sectional study design limits our ability to directly evaluate the influence of overall and central obesity as well as the change of their prevalence on the risk of hypertension and T2DM.
- The differences in several demographic characteristics between the participants of the two surveys indicate the possibility of selection bias.

69

70

## 71 Introduction

72 A rising worldwide prevalence of chronic disease, manifested primarily as hypertension and  
73 type 2 diabetes (T2DM), has been well documented [1-4]. In Chinese aged 15-74 years old, the  
74 prevalence of hypertension increased from 5.11% in 1959, 7.73% in 1979 [5] and 13.58% in 1991[6]  
75 to 17.65% in 2002 [7]. The prevalence of T2DM tripled between 1980 (about 1.0%) and 1996  
76 (3.2%) [8 9], and reached 9.7% in 2008 among adults at 20 years old or above [10]. It is estimated  
77 that over 92 million people in China have T2DM. This represents approximately half of the world's  
78 diabetic population, and places China at the “global epicenter of the diabetes epidemic” [4].

79 Both hypertension and T2DM are associated with obesity [11 12]. Obesity is often measured  
80 by body mass index (BMI). Across the entire range of BMI, the risk of hypertension and T2DM  
81 increases, making a higher BMI a strong predictor of both hypertension and T2DM [4 12-14].  
82 However, a significant proportion of Asian adults diagnosed with T2DM are with the normal BMI,  
83 ie.18.5-25.0 kg/m<sup>2</sup> [15 16]. BMI is a general indicator of overt obesity, but does not give  
84 information about the distribution of obesity. Central obesity, often assessed via waist  
85 circumference (WC), is also strongly correlated with T2DM in both European and Asian adults [11  
86 17]. While changes in BMI have been well documented in China over past several decades [2 18],  
87 changes in WC, and thus central obesity, are not well described.

88 In this study, we took advantage of the data from population based cross-sectional surveys  
89 conducted in Shanghai in 2002-03 and in 2009. We used the data from the two surveys to evaluate  
90 correlations between shifts in BMI and WC with the prevalence of hypertension and T2DM in  
91 Chinese adults. Our results may help to better understand the contribution of overall obesity and  
92 central obesity in the increasing burden of chronic disease in China.

## 93 Materials and Methods

### 94 Study Participants

95 A representative sample of the general population was randomly selected through a multistage  
96 sampling process in the 2002-03 survey. Firstly, 4 districts and 2 counties were randomly selected

1  
2 97 from a total of 12 districts and 7 counties in Shanghai, China. And then, 1-2 sub-districts or towns  
3  
4 98 were randomly selected from each selected district or county. Next, 1-2 communities or villages,  
5  
6 99 usually 1,000-2,000 residents for each, were randomly selected from each selected sub-district or  
7  
8 100 town. Finally, eligible subjects (permanent residents of Shanghai, 15-74 years old and having been  
9  
10 101 in the city for at least 5 years) were randomly selected from the selected communities and villages  
11  
12 102 and were invited for participation. Pregnant women, individuals with type I diabetes, and physically  
13  
14 103 or mentally disabled persons were excluded from the participation. During the period of May  
15  
16 104 2002-October 2003, a total of 17,526 eligible subjects were recruited, and 14,401 (82.17%)  
17  
18 105 participated the survey.

21 106 The 2009 survey used the similar sampling method except that only 7 communities and  
22  
23 107 villages were randomly selected in the third stage of sampling. The inclusion and exclusion criteria  
24  
25 108 of the 2009 survey were also similar to those for the 2002-03 survey, except that only those at the  
26  
27 109 age of 35-74 years old were eligible for the 2009 survey. Among 7,627 eligible adults contacted  
28  
29 110 during the period of May-July 2009, 7,414 (97.21%) were interviewed and donated blood samples.

32 111 To make the two surveys comparable, we excluded 1,071 subjects younger than 35 years from  
33  
34 112 the 2002-03 survey. After further excluding subjects with missing information, the final analysis  
35  
36 113 included 5,050 men and 7,279 women in the 2002-03 survey and 3,461 men and 3,962 women in  
37  
38 114 the 2009 survey. The Institutional Review Board at Shanghai Municipal Center of Disease Control  
39  
40 115 and Prevention approved the study. **Informed consent was obtained from each participant before**  
41  
42 116 **data collection and laboratory measurements.**

#### 46 117 **Data Collection**

48 118 A similar survey approach was followed by the two investigations. In both surveys,  
49  
50 119 information on demographic and socioeconomic factors, diagnosis of diabetes, tobacco and alcohol  
51  
52 120 use, physical activity and family history of diabetes was collected by trained interviewers with a  
53  
54 121 structured questionnaire at community clinics located in the residential areas of the participants.

57 122 At the interview, each participant's blood pressure, body weight, standing height, and waist

1  
2 123 circumference (WC) were measured by trained staff. Blood pressure was measured on the right arm  
3  
4 124 in the sitting position using standard mercury sphygmomanometer after at least 5 minutes of rest.  
5  
6 125 The first and fifth Korotkoff sounds were recorded. Body weight and height were recorded while  
7  
8 126 the subject was in light clothing and without shoes. Body weight was measured with electronic  
9  
10 127 scales to the nearest 0.1 kg. Body height was measured to the nearest 0.1 cm by using a stadiometer.  
11  
12 128 WC, recorded to the nearest 0.1 cm, was taken with a cloth tape and was measured on bare skin at  
13  
14 129 the midline between the lower border of the ribs and the iliac crest in the horizontal plane after a  
15  
16 130 normal expiration. Two measurements were taken and the mean of the replicates was used in the  
17  
18 131 following analyses. Body mass index (BMI) was calculated as weight in kilograms divided by  
19  
20 132 height in meters squared ( $\text{kg/m}^2$ ) using the direct measurements.  
21  
22  
23

### 24 133 **Laboratory Measurements**

25  
26 134 After at least 10 hours of overnight fasting, 1-1.5 ml venous blood specimen was collected in a  
27  
28 135 vacuum tube containing sodium fluoride. All participants with no history of diabetes and having a  
29  
30 136 fasting plasma glucose level of  $< 7.0$  mmol per liter (mmol/l) were then asked to have an oral  
31  
32 137 glucose-tolerance test (OGTT). Blood samples were drawn at 0 and 120 minutes after a standard 75  
33  
34 138 gram glucose load. Plasma glucose was measured with Glucose oxidase-peroxidase (GOD-PAP)  
35  
36 139 method.  
37  
38

### 39 140 **Diagnosis of T2DM and Hypertension**

40  
41 141 Previously diagnosed T2DM and hypertension was identified by a positive response from the  
42  
43 142 participant to the question of “Have you ever diagnosed with T2DM/hypertension by a doctor?” and  
44  
45 143 confirmed by medical records in which prescriptions of anti-hypertensive or hypoglycemic  
46  
47 144 medications were presented. The consistent rate was 100%. For those who had a negative response,  
48  
49 145 the T2DM was diagnosed with measured glucose level by using the 1999 World Health  
50  
51 146 Organization diagnostic criteria [Department of Noncommunicable Disease Surveillance. Definition,  
52  
53 147 diagnosis and classification of diabetes mellitus and its complications: report of a WHO  
54  
55 148 consultation. Part 1. Diagnosis and classification of diabetes mellitus. Geneva: World Health  
56  
57  
58  
59  
60

1  
2 149 Organization, 1999. (Accessed July 5, 2010, at\_  
3  
4 150 [http://www.staff.ncl.ac.uk/philip.home/who\\_dmg.pdf](http://www.staff.ncl.ac.uk/philip.home/who_dmg.pdf).)] and hypertension referred to the subjects  
5  
6 151 with measured systolic blood pressure (SBP)  $\geq$  140 mmHg or diastolic blood pressure (DBP)  $\geq$  90  
7  
8 152 mmHg and confirmed by clinical visits. Total T2DM and hypertension included both previously  
9  
10 153 diagnosed and newly-diagnosed patients. 42.7% (1,110 of 2,598) diabetic patients and 10.3% (694  
11  
12 154 of 6,735) hypertensive patients were newly-diagnosed in the two surveys.

### 155 **Statistical Analysis**

156 SAS software 9.2 was used for all the statistical analyses. Characteristics of the subgroups  
157 were described using summary statistics (median, 25<sup>th</sup> and 75<sup>th</sup> percentile, frequencies, and  
158 percentages) separately for men and women. The differences between two surveys were compared  
159 using  $\chi^2$  test (category variables) and Wilcoxon tests (continuous variables). The annual percentage  
160 changes (APC) in prevalence between two surveys were calculated as (prevalence in 2009 –  
161 prevalence in 2002-03) / number of years using logarithms for each age group. Percentile curves  
162 were constructed for BMI and WC values in the two surveys by gender using the LMS (lambda, mu,  
163 sigma) method. Restricted cubic splines (RCS) were used to model a potential curvilinear  
164 relationship of BMI and WC with hypertension and diabetes using the 5<sup>th</sup>, 25<sup>th</sup>, 75<sup>th</sup> and 95<sup>th</sup>  
165 percentiles as fixed knots and the 50<sup>th</sup> percentile as the reference. Polynomial logistic regression  
166 were used to estimate the odds ratios (OR) and 95% confidence intervals (95% CI) of BMI and WC  
167 with T2DM and hypertension. Meta-analysis was applied to obtain the combined ORs and 95% CI  
168 considering the potential heterogeneity of the populations in the two surveys. The residual method  
169 was used to derive the independent effect of BMI and WC with each other in the models. *P* value  
170 less than 0.05 was considered as a test of significance based on two sides.

### 171 **Results**

172 The male participants in two studies were similar in age, resident site and cigarette smoking  
173 while the female participants were comparable in cigarette smoking (*P* > 0.05) (Table 1). Compared  
174 to the subjects in 2002-03 survey, the participants of 2009 survey, both men and women, had lower

1  
2 175 level of education, higher level of income per capita, more prior history of T2DM, higher frequency  
3  
4 176 of alcohol drinking and lower frequency of leisure time activity, and were more likely to have a  
5  
6 177 family history of diabetes.  
7

8  
9 178 Figure 1 shows the shapes of the BMI and WC distribution curves among men and women  
10  
11 179 changed over the period of the two surveys. After adjusting for age, education, per capita income,  
12  
13 180 resident site, smoking, drinking, regular exercise, and family history of T2DM, the curves of BMI  
14  
15 181 were almost overlapped in both men and women. However, the WC curves for men and women  
16  
17 182 were shifted to the right between 2002-03 and 2009, with the mean WC increasing from 83.6 to  
18  
19 183 85.3 cm for men and from 78.4 to 80.6 cm for women.  
20

21  
22 184 As presented in table 2, the prevalence of obesity, both overall and central, increased with  
23  
24 185 increasing age groups. While the prevalence of overall obesity ( $\text{BMI} \geq 28 \text{ kg/m}^2$ ) **did not change**  
25  
26 186 between two surveys (all  $P$  values  $> 0.05$ ), the prevalence of central obesity **was** significantly higher  
27  
28 187 in 2009 survey in each age group (all  $P$  values  $< 0.001$ ). A more pronounced increase in **the**  
29  
30 188 prevalence of central obesity and T2DM was observed among subjects aged 45-49 years old in both  
31  
32 189 men and women; whereas the change in **the** prevalence of hypertension between two surveys  
33  
34 190 appeared more evident in older men and younger women over the period. Using the World Health  
35  
36 191 Organization (WHO) criteria for obesity did not change the results substantially (data not shown in  
37  
38 192 the tables).  
39

40  
41 193 BMI and WC were highly correlated with each other, with a correlation coefficient of 0.77 ( $P <$   
42  
43 194 0.0001) among men and 0.78 ( $P < 0.0001$ ) among women after adjusting for age. Therefore, the  
44  
45 195 residual method was used to test the potential respective non-linear relationships of BMI and WC  
46  
47 196 with the risk of T2DM and hypertension (Figure 2). The dose-response analysis likewise showed a  
48  
49 197 statistically significant increased risk of T2DM at high level of WC and a significant elevated risk  
50  
51 198 of hypertension at high level of BMI in both men and women after adjusting for age, education, per  
52  
53 199 capita income, resident site, smoking, **alcohol consumption**, regular exercise, family history of  
54  
55 200 T2DM and phase of surveys, with  $P$  values for non-linear relationship tests  $< 0.05$ . No significant  
56  
57  
58  
59  
60

1  
2 201 relationship was observed between BMI and T2DM in men and between WC and hypertension in  
3  
4 202 women.

5  
6 203 As shown in table 3, in both sexes, BMI adjusted for WC (residuals) appeared more strongly  
7  
8 204 associated with hypertension while WC adjusted for BMI (residuals) was more evidently related  
9  
10 205 with T2DM. Comparing with the lowest quartile of BMI residuals, the risk of hypertension  
11  
12 206 increased 85% (95%CI: 1.59-2.15) in men and 1.23-fold (95%CI: 1.94-2.57) in women, whereas  
13  
14 207 the risk of T2DM did not increase significantly in both sexes. On the other hand, the ORs of the  
15  
16 208 highest versus the lowest quartile WC residuals for T2DM were 1.75 (95%CI: 1.33-2.30) in men  
17  
18 209 and 2.37 (95%CI: 1.78-3.15) in women, higher than the OR of 1.57 (95%CI: 1.35-1.82) in men and  
19  
20 210 1.13 (95%CI: 0.98-1.30) in women for hypertension.

21  
22  
23  
24 211 We further evaluated the potential joint effect of BMI and WC on T2DM and hypertension  
25  
26 212 (table 4). The participants were classified into normal weight (BMI 18.5-23.9 kg/m<sup>2</sup>), overweight  
27  
28 213 (24.0-27.9 kg/m<sup>2</sup>), or obese ( $\geq 28$  kg/m<sup>2</sup>) based on data from Chinese adults, and were defined as  
29  
30 214 with normal or increased WC using sex-specific cut-offs (85 cm in men and 80 cm in women) [19].  
31  
32 215 The risk of T2DM and hypertension increased across groups defined by BMI and WC, with the  
33  
34 216 highest risk observed among men with the lowest BMI but a higher WC, and among those with the  
35  
36 217 highest BMI and a higher WC for hypertension. However, no significant interaction was observed  
37  
38 218 between BMI and WC (all *P* values for interaction tests > 0.05).

## 39 40 41 42 219 **Discussion**

43  
44 220 In this representative sample of the adult population in Shanghai, the largest city in China, we  
45  
46 221 observed an increased prevalence of central obesity, hypertension and T2DM over the decade  
47  
48 222 spanning 2002-2009. In contrast, BMI did not change over the same period. Our results present a  
49  
50 223 snapshot of overt versus central obesity in the Chinese population and suggest that the epidemic of  
51  
52 224 central obesity in this population, which has been more closely associated with the prevalence of  
53  
54 225 T2DM, may lead to a more rapidly growing burden of T2DM in China.

55  
56 226 Chinese adults have lower rates of overweight and obesity than their Western counterparts  
57  
58  
59  
60

1  
2 227 using the WHO criteria (BMI  $\geq$  25 kg/m<sup>2</sup> for overweight and BMI  $\geq$  30 kg/m<sup>2</sup> for obesity) [15 16].  
3  
4 228 Nevertheless, increasing trends of BMI in Chinese adults have been well documented [18 20]. In  
5  
6 229 two national nutritional surveys undertaken in 1982 and 1992 in China, the prevalence of  
7  
8 230 overweight/obesity (BMI  $\geq$  25 kg/m<sup>2</sup>) in subjects 20-70 years of age was 10% and 15%,  
9  
10 231 respectively. Between 1992 and 2002, the combined prevalence of overweight and obesity increased  
11  
12 232 from 14.6 to 21.8% [21]. Interestingly, the increase in BMI among Chinese adults has slowed down  
13  
14 233 during past decades [2]. In this study, we did not observe an increase in BMI and prevalence of  
15  
16 234 obesity defined by the Chinese obesity standards or by WHO criteria (data not shown). Instead, we  
17  
18 235 observed a significant increase in WC, a measure of central obesity between surveys. Our  
19  
20 236 observation of increased WC in Chinese adults, without a concomitant increase in BMI, represents  
21  
22 237 an increasing burden of central obesity in this population. The increase in central obesity indicates  
23  
24 238 an upward trend in body fat percentages in the population who have been previously observed with  
25  
26 239 higher body fat percentages compared to other ethnic people with the same BMI [22 23].

30 240 Both **epidemics** of overall and central obesity parallel a continuously increasing prevalence of  
31  
32 241 hypertension and T2DM in China [21]. Several studies indicate that overall obesity (BMI) is more  
33  
34 242 strongly associated with hypertension, while central obesity (WC) is more strongly associated with  
35  
36 243 T2DM [17 24-26]. The rationale for these associations is based on the notion that central obesity  
37  
38 244 reflects specific accumulation of visceral adipose tissue. Excess visceral adipose tissue is  
39  
40 245 metabolically unfavorable due to productions of free fatty acids and inflammatory mediators.  
41  
42 246 Overall obesity, on the other hand, represents a greater overall physiologic strain and effects  
43  
44 247 vascular and cardiac parameters more significantly. In this study, we observed a significant increase  
45  
46 248 in prevalence of T2DM regardless of gender or age groups, which was more pronounced than the  
47  
48 249 change in the prevalence of hypertension during the period of 2002-03 and 2009. We also observed  
49  
50 250 a closer association of central obesity with the prevalence of T2DM than with the prevalence of  
51  
52 251 hypertension. These results support the notion that central obesity in particular is a stronger risk  
53  
54 252 factor for T2DM than for hypertension in Chinese adults. Due to the cross-sectional design,  
55  
56  
57  
58  
59  
60



1  
2 253 however, our study was unable to make a causal inference.

3  
4 254 The nature of the cross-sectional study design limits our ability to directly evaluate the  
5  
6 255 influence of overall and central obesity as well as the change of their prevalence on the risk of  
7  
8 256 hypertension and T2DM. The differences in several demographic characteristics between the  
9  
10 257 participants of the two surveys indicate the changes in general population over time. However,  
11  
12 258 selection bias could not be excluded. There are several strengths in this study, including the strict  
13  
14 259 process of multistage sampling in adult population in Shanghai, anthropometric measurement  
15  
16 260 according to a standardized protocol and fasting and postprandial blood glucose tests for the  
17  
18 261 participants.  
19  
20

## 21 22 262 **Conclusions**

23  
24  
25 263 In summary, this study describes the potential association of central obesity with an upward  
26  
27 264 trend of T2DM. **Our findings provide useful information about the growing burden of type 2**  
28  
29 265 **diabetes and hypertension in Chinese adults and suggest the need for further study in other rapidly**  
30  
31 266 **changing populations in China.**  
32

## 33 34 267 35 36 268 **Acknowledgements**

37  
38  
39 269 We thank Dr. Xiao-ou Shu and Dr. Hui Cai of Vanderbilt University for their contributions in  
40  
41 270 study design and data analysis. The authors thank the study participants of the two cross-sectional  
42  
43 271 surveys and the healthcare workers in each community involved.  
44  
45

## 46 272 **Footnotes**

47  
48  
49 273 **Contributors** YR and MM contributed to data collection, data analysis and draft of the paper.  
50  
51 274 YR, YYL, QDY, and LS contributed to data collection and quality control. LJM contributed to  
52  
53 275 revision of the paper. HZ contributed to data clean and analysis. RL and WHX contributed to study  
54  
55 276 design, statistical analysis and revision of the paper. All authors contributed to the interpretation of  
56  
57 277 data and revision of the manuscript. All authors approved the final version.  
58  
59  
60

1  
2 278 **Funding** This study was supported by the Key Program of Shanghai Municipal Committee of  
3  
4 279 Science and Technology (04 DZ19502), the Shanghai Medical Development Program (01ZD001)  
5  
6 280 and the Shanghai Municipal Health Bureau (GWDTR201204). W. H. Xu was supported by a  
7  
8 281 training grant from the Fogarty International Center (D43 TW008313 to X. O. Shu). The funders  
9  
10 282 had no role in study design, data collection or analysis, decision to publish, or preparation of the  
11  
12 283 manuscript.

13  
14  
15 284 **Conflict of Interest:** None declared.

16  
17 285  
18  
19  
20  
21  
22  
23  
24  
25  
26  
27  
28  
29  
30  
31  
32  
33  
34  
35  
36  
37  
38  
39  
40  
41  
42  
43  
44  
45  
46  
47  
48  
49  
50  
51  
52  
53  
54  
55  
56  
57  
58  
59  
60

## 286 REFERENCES

- 287 1. Kelly T, Yang W, Chen CS, Reynolds K, He J. Global burden of obesity in 2005 and projections to 2030. *Int J Obes*  
288 (Lond) 2008;**32**(9):1431-7 doi: ijo2008102 [pii]  
289 10.1038/ijo.2008.102[published Online First: Epub Date].
- 290 2. Popkin BM. Recent dynamics suggest selected countries catching up to US obesity. *Am J Clin Nutr*  
291 2010;**91**(1):284S-88S doi: ajcn.2009.28473C [pii]  
292 10.3945/ajcn.2009.28473C[published Online First: Epub Date].
- 293 3. Shaw JE, Sicree RA, Zimmet PZ. Global estimates of the prevalence of diabetes for 2010 and 2030. *Diabetes Res*  
294 *Clin Pract* 2010;**87**(1):4-14 doi: S0168-8227(09)00432-X [pii]  
295 10.1016/j.diabres.2009.10.007[published Online First: Epub Date].
- 296 4. Hu FB. Globalization of diabetes: the role of diet, lifestyle, and genes. *Diabetes care* 2011;**34**(6):1249-57 doi:  
297 10.2337/dc11-0442[published Online First: Epub Date].
- 298 5. Wu YK, Lu CQ, Gao RC, Yu JS, Liu GC. Nation-wide hypertension screening in China during 1979-1980. *Chin Med*  
299 *J (Engl)* 1982;**95**(2):101-8
- 300 6. Wu X, Duan X, Gu D, Hao J, Tao S, Fan D. Prevalence of hypertension and its trends in Chinese populations. *Int J*  
301 *Cardiol* 1995;**52**(1):39-44 doi: 016752739502443Z [pii][published Online First: Epub Date].
- 302 7. Wu Y, Huxley R, Li L, et al. Prevalence, awareness, treatment, and control of hypertension in China: data from the  
303 China National Nutrition and Health Survey 2002. *Circulation* 2008;**118**(25):2679-86 doi:  
304 10.1161/CIRCULATIONAHA.108.788166  
305 118/25/2679 [pii][published Online First: Epub Date].
- 306 8. [A mass survey of diabetes mellitus in a population of 300,000 in 14 provinces and municipalities in China (author's  
307 transl)]. *Zhonghua Nei Ke Za Zhi* 1981;**20**(11):678-83
- 308 9. Wang K, Li T, Xiang H. [Study on the epidemiological characteristics of diabetes mellitus and IGT in China].  
309 *Zhonghua Liu Xing Bing Xue Za Zhi* 1998;**19**(5):282-5
- 310 10. Yang W, Lu J, Weng J, et al. Prevalence of diabetes among men and women in China. *The New England journal of*  
311 *medicine* 2010;**362**(12):1090-101 doi: 10.1056/NEJMoa0908292[published Online First: Epub Date].
- 312 11. Nyamdorj R, Qiao Q, Lam TH, et al. BMI compared with central obesity indicators in relation to diabetes and  
313 hypertension in Asians. *Obesity (Silver Spring)* 2008;**16**(7):1622-35 doi: 10.1038/oby.2008.73  
314 oby200873 [pii][published Online First: Epub Date].
- 315 12. Ostchega Y, Hughes JP, Terry A, Fakhouri TH, Miller I. Abdominal obesity, body mass index, and hypertension in  
316 US adults: NHANES 2007-2010. *Am J Hypertens* 2012;**25**(12):1271-8 doi: 10.1038/ajh.2012.120  
317 ajh2012120 [pii][published Online First: Epub Date].
- 318 13. Barrett-Connor E. Epidemiology, obesity, and non-insulin-dependent diabetes mellitus. *Epidemiol Rev*  
319 1989;**11**:172-81
- 320 14. Weber MB, Oza-Frank R, Staimetz LR, Ali MK, Narayan KM. Type 2 diabetes in Asians: prevalence, risk factors,  
321 and effectiveness of behavioral intervention at individual and population levels. *Annu Rev Nutr*  
322 2012;**32**:417-39 doi: 10.1146/annurev-nutr-071811-150630[published Online First: Epub Date].
- 323 15. Lu B, Yang Y, Song X, et al. An evaluation of the International Diabetes Federation definition of metabolic  
324 syndrome in Chinese patients older than 30 years and diagnosed with type 2 diabetes mellitus. *Metabolism*  
325 2006;**55**(8):1088-96 doi: S0026-0495(06)00138-7 [pii]  
326 10.1016/j.metabol.2006.04.003[published Online First: Epub Date].
- 327 16. Tseng CH. Body mass index and waist circumference as determinants of coronary artery disease in Taiwanese adults  
328 with type 2 diabetes mellitus. *Int J Obes (Lond)* 2006;**30**(5):816-21 doi: 0803218 [pii]  
329 10.1038/sj.ijo.0803218[published Online First: Epub Date].
- 330 17. Feng RN, Zhao C, Wang C, et al. BMI is strongly associated with hypertension, and waist circumference is strongly  
331 associated with type 2 diabetes and dyslipidemia, in northern Chinese adults. *Journal of epidemiology / Japan*

- 1  
2 332 Epidemiological Association 2012;**22**(4):317-23
- 3 333 18. Wildman RP, Gu D, Muntner P, et al. Trends in overweight and obesity in Chinese adults: between 1991 and  
4 334 1999-2000. *Obesity (Silver Spring)* 2008;**16**(6):1448-53 doi: oby2008208 [pii]  
5 335 10.1038/oby.2008.208[published Online First: Epub Date]].  
6  
7 336 19. Zhou BF. Predictive values of body mass index and waist circumference for risk factors of certain related diseases in  
8 337 Chinese adults--study on optimal cut-off points of body mass index and waist circumference in Chinese adults.  
9 338 *Biomed Environ Sci* 2002;**15**(1):83-96
- 10 339 20. Wang H, Du S, Zhai F, Popkin BM. Trends in the distribution of body mass index among Chinese adults, aged 20-45  
11 340 years (1989-2000). *Int J Obes (Lond)* 2007;**31**(2):272-8 doi: 0803416 [pii]  
12 341 10.1038/sj.ijo.0803416[published Online First: Epub Date]].
- 13 342 21. Wang Y, Mi J, Shan XY, Wang QJ, Ge KY. Is China facing an obesity epidemic and the consequences? The trends in  
14 343 obesity and chronic disease in China. *Int J Obes (Lond)* 2007;**31**(1):177-88 doi: 0803354 [pii]  
15 344 10.1038/sj.ijo.0803354[published Online First: Epub Date]].
- 16 345 22. Wang J, Thornton JC, Burastero S, et al. Comparisons for body mass index and body fat percent among Puerto  
17 346 Ricans, blacks, whites and Asians living in the New York City area. *Obes Res* 1996;**4**(4):377-84
- 18 347 23. Araneta MR, Wingard DL, Barrett-Connor E. Type 2 diabetes and metabolic syndrome in Filipina-American  
19 348 women : a high-risk nonobese population. *Diabetes Care* 2002;**25**(3):494-9
- 20 349 24. Jacobs EJ, Newton CC, Wang Y, et al. Waist circumference and all-cause mortality in a large US cohort. *Archives of*  
21 350 *internal medicine* 2010;**170**(15):1293-301 doi: 10.1001/archinternmed.2010.201[published Online First: Epub  
22 351 Date]].
- 23 352 25. InterAct C, Langenberg C, Sharp SJ, et al. Long-term risk of incident type 2 diabetes and measures of overall and  
24 353 regional obesity: the EPIC-InterAct case-cohort study. *PLoS medicine* 2012;**9**(6):e1001230 doi:  
25 354 10.1371/journal.pmed.1001230[published Online First: Epub Date]].
- 26 355 26. Li R, Shi L, Jia J, et al. Differentiating the Associations of Waist Circumference and Body Mass Index With  
27 356 Cardiovascular Disease Risk in a Chinese Population. *Asia-Pacific journal of public health / Asia-Pacific*  
28 357 *Academic Consortium for Public Health* 2012 doi: 10.1177/1010539512465306[published Online First: Epub  
29 358 Date]].
- 30 359  
31 360

1  
2 361 Figure 1. Shift in BMI and WC over the period of the two population-based surveys

3  
4 362 Figure 2. Non-linear dose-response relationship of BMI and WC with hypertension and T2DM

5  
6 363 among participants of the two population-based surveys

7  
8 364

9  
10  
11  
12  
13  
14  
15  
16  
17  
18  
19  
20  
21  
22  
23  
24  
25  
26  
27  
28  
29  
30  
31  
32  
33  
34  
35  
36  
37  
38  
39  
40  
41  
42  
43  
44  
45  
46  
47  
48  
49  
50  
51  
52  
53  
54  
55  
56  
57  
58  
59  
60

For peer review only

365 Table 1. Characteristics of participants in two population-based surveys in Shanghai, China

| Characteristics                  | 1 <sup>st</sup> survey |                    | 2 <sup>nd</sup> survey |                    | <i>P-value between surveys<sup>a</sup></i> |                 |
|----------------------------------|------------------------|--------------------|------------------------|--------------------|--------------------------------------------|-----------------|
|                                  | Men<br>(N=5,050)       | Women<br>(N=7,279) | Men<br>(N=3,461)       | Women<br>(N=3,962) | <i>In men</i>                              | <i>In women</i> |
| Age (yrs., mean ± SD)            | 54.8 ± 10.8            | 53.1 ± 10.3        | 54.7 ± 9.5             | 54.7 ± 9.1         | 0.55                                       | <0.0001         |
| Resident site (%)                |                        |                    |                        |                    |                                            |                 |
| Urban                            | 71.1                   | 63.0               | 72.4                   | 72.0               |                                            |                 |
| Rural                            | 29.0                   | 37.0               | 27.7                   | 28.0               | 0.19                                       | <0.0001         |
| Education (%)                    |                        |                    |                        |                    |                                            |                 |
| No formal education              | 4.1                    | 18.4               | 3.2                    | 9.5                |                                            |                 |
| Primary school                   | 18.2                   | 23.0               | 14.7                   | 17.7               |                                            |                 |
| Middle school                    | 35.3                   | 31.1               | 45.7                   | 45.2               |                                            |                 |
| High school                      | 27.6                   | 22.6               | 27.6                   | 23.8               |                                            |                 |
| College or above                 | 14.8                   | 4.9                | 8.8                    | 3.9                | 0.0025                                     | <0.0001         |
| Per capita income (yuan/mo.) (%) |                        |                    |                        |                    |                                            |                 |
| <1000                            | 37.0                   | 45.5               | 4.9                    | 4.0                |                                            |                 |
| 1000-2999                        | 38.3                   | 38.4               | 41.8                   | 46.7               |                                            |                 |
| 3000-5000                        | 22.5                   | 17.9               | 33.2                   | 33.3               |                                            |                 |
| >5000                            | 2.2                    | 1.3                | 20.0                   | 16.0               | <0.0001                                    | <0.0001         |
| Family history of type 2diabetes | 12.3                   | 13.1               | 16.4                   | 19.0               | <0.0001                                    | <0.0001         |
| Prevalence of type 2diabetes (%) | 13.6                   | 10.3               | 17.4                   | 14.1               | <0.0001                                    | <0.0001         |
| Prevalence of hypertension (%)   | 34.8                   | 28.3               | 41.8                   | 37.1               | <0.0001                                    | <0.0001         |
| Cigarette smoking (%)            | 61.4                   | 1.7                | 62.6                   | 1.8                | 0.22                                       | 0.93            |
| Alcohol drinking (%)             | 40.4                   | 2.4                | 54.0                   | 5.0                | <0.0001                                    | <0.0001         |
| Leisure-time activity (%)        | 13.3                   | 13.1               | 10.8                   | 9.0                | 0.0009                                     | <0.0001         |

366 <sup>a</sup> *P* for Wilcoxon tests or chi-square tests

Table 2. Prevalence of obesity, hypertension and type 2 diabetes in participants of the two population-based surveys by age groups in Shanghai, China

|                         | No. of subjects        |                        | Overall Obesity        |                        | APC   | Central obesity        |                        | APC  | Hypertension           |                        | APC   | Type 2 diabetes        |                        | APC   |
|-------------------------|------------------------|------------------------|------------------------|------------------------|-------|------------------------|------------------------|------|------------------------|------------------------|-------|------------------------|------------------------|-------|
|                         | 1 <sup>st</sup> survey | 2 <sup>nd</sup> survey | 1 <sup>st</sup> survey | 2 <sup>nd</sup> survey | (%)   | 1 <sup>st</sup> survey | 2 <sup>nd</sup> survey | (%)  | 1 <sup>st</sup> survey | 2 <sup>nd</sup> survey | (%)   | 1 <sup>st</sup> survey | 2 <sup>nd</sup> survey | (%)   |
| Men                     |                        |                        |                        |                        |       |                        |                        |      |                        |                        |       |                        |                        |       |
| Overall                 | 5050                   | 3461                   | 11.7                   | 11.9                   | 0.21  | 46.3                   | 53.8                   | 2.35 | 34.8                   | 41.8                   | 2.87  | 13.6                   | 17.4                   | 3.78  |
| Age-groups              |                        |                        |                        |                        |       |                        |                        |      |                        |                        |       |                        |                        |       |
| 35-                     | 414                    | 230                    | 10.5                   | 9.1                    | -2.11 | 41.8                   | 45.2                   | 1.22 | 15.2                   | 11.7                   | -3.92 | 4.6                    | 5.7                    | 3.25  |
| 40-                     | 574                    | 302                    | 10.0                   | 8.3                    | -2.83 | 41.8                   | 47.00                  | 1.85 | 22.5                   | 21.9                   | -0.43 | 7.8                    | 7.6                    | -0.44 |
| 45-                     | 837                    | 445                    | 12.6                   | 12.6                   | -0.04 | 44.0                   | 53.7                   | 3.12 | 25.3                   | 31.0                   | 3.16  | 7.8                    | 13.7                   | 9.13  |
| 50-                     | 833                    | 739                    | 12.2                   | 10.8                   | -1.76 | 44.1                   | 53.8                   | 3.12 | 33.1                   | 40.3                   | 3.07  | 12.7                   | 18.3                   | 5.72  |
| 55-                     | 628                    | 669                    | 10.4                   | 13.2                   | 3.78  | 47.3                   | 54.6                   | 2.25 | 35.4                   | 45.6                   | 3.99  | 15.0                   | 17.9                   | 2.82  |
| 60-                     | 507                    | 513                    | 10.5                   | 15.4                   | 6.18  | 48.7                   | 56.1                   | 2.19 | 44.6                   | 51.7                   | 2.29  | 15.6                   | 20.1                   | 3.98  |
| 65-                     | 674                    | 313                    | 12.6                   | 11.8                   | -0.99 | 51.4                   | 61.0                   | 2.67 | 49.4                   | 59.4                   | 2.88  | 20.8                   | 26.2                   | 3.64  |
| 70-                     | 583                    | 250                    | 13.8                   | 9.6                    | -5.40 | 51.1                   | 54.0                   | 0.85 | 50.9                   | 65.2                   | 3.87  | 24.2                   | 25.6                   | 0.88  |
| Women                   |                        |                        |                        |                        |       |                        |                        |      |                        |                        |       |                        |                        |       |
| Overall                 | 7279                   | 3962                   | 13.8                   | 13.8                   | 0.02  | 41.7                   | 54.2                   | 4.10 | 28.3                   | 37.1                   | 4.28  | 10.3                   | 14.1                   | 4.84  |
| Age-groups              |                        |                        |                        |                        |       |                        |                        |      |                        |                        |       |                        |                        |       |
| 35-                     | 615                    | 251                    | 7.5                    | 7.2                    | -0.65 | 22.6                   | 26.3                   | 2.35 | 6.8                    | 10.8                   | 7.24  | 3.3                    | 4.0                    | 3.17  |
| 40-                     | 1000                   | 287                    | 9.4                    | 11.2                   | 2.66  | 27.6                   | 38.0                   | 5.05 | 11.7                   | 15.7                   | 4.61  | 4.1                    | 5.9                    | 5.81  |
| 45-                     | 1491                   | 563                    | 11.0                   | 9.8                    | -1.82 | 32.3                   | 42.6                   | 4.38 | 19.3                   | 23.5                   | 3.03  | 5.8                    | 8.7                    | 6.32  |
| 50-                     | 1309                   | 866                    | 15.1                   | 14.1                   | -1.00 | 43.9                   | 54.0                   | 3.24 | 28.7                   | 31.0                   | 1.16  | 8.3                    | 9.4                    | 1.94  |
| 55-                     | 838                    | 818                    | 15.7                   | 13.6                   | -2.17 | 47.5                   | 60.6                   | 3.83 | 33.9                   | 39.7                   | 2.48  | 8.8                    | 15.3                   | 8.80  |
| 60-                     | 610                    | 585                    | 19.2                   | 18.1                   | -0.87 | 53.5                   | 63.1                   | 2.58 | 40.5                   | 52.8                   | 4.17  | 16.7                   | 19.2                   | 2.11  |
| 65-                     | 799                    | 327                    | 18.0                   | 18.4                   | 0.28  | 59.0                   | 66.1                   | 1.76 | 48.4                   | 59.3                   | 3.17  | 23.7                   | 27.8                   | 2.54  |
| 70-                     | 617                    | 265                    | 18.2                   | 16.6                   | -1.36 | 60.2                   | 68.7                   | 2.05 | 51.4                   | 64.5                   | 3.57  | 21.4                   | 27.2                   | 3.75  |
| All subjects            |                        |                        |                        |                        |       |                        |                        |      |                        |                        |       |                        |                        |       |
| Overall                 | 12329                  | 7423                   | 13.0                   | 12.9                   | -0.05 | 43.6                   | 54.0                   | 3.35 | 31.0                   | 39.3                   | 3.75  | 11.7                   | 15.6                   | 4.53  |
| Age-groups <sup>a</sup> |                        |                        |                        |                        |       |                        |                        |      |                        |                        |       |                        |                        |       |
| 35-                     | 1029                   | 481                    | 8.7                    | 8.0                    | -1.04 | 30.3                   | 33.9                   | 2.39 | 10.2                   | 11.2                   | 1.49  | 3.8                    | 4.7                    | 3.63  |
| 40-                     | 1574                   | 589                    | 9.6                    | 10.1                   | 0.11  | 32.7                   | 41.3                   | 4.14 | 15.6                   | 17.9                   | 2.92  | 5.5                    | 6.5                    | 3.41  |
| 45-                     | 2328                   | 1008                   | 11.6                   | 10.8                   | -0.77 | 36.5                   | 46.6                   | 4.16 | 21.5                   | 26.2                   | 3.46  | 6.5                    | 10.5                   | 8.22  |
| 50-                     | 2142                   | 1605                   | 13.9                   | 12.8                   | -1.53 | 44.0                   | 53.9                   | 3.19 | 30.4                   | 34.6                   | 0.90  | 10.0                   | 12.8                   | 4.69  |
| 55-                     | 1466                   | 1487                   | 13.4                   | 13.4                   | 0.01  | 47.4                   | 58.1                   | 3.13 | 34.5                   | 42.2                   | 3.20  | 11.5                   | 16.4                   | 5.75  |
| 60-                     | 1117                   | 1098                   | 15.2                   | 16.9                   | 1.59  | 51.3                   | 59.9                   | 2.39 | 42.4                   | 52.3                   | 3.29  | 16.2                   | 19.6                   | 2.96  |
| 65-                     | 1473                   | 640                    | 15.6                   | 15.4                   | -0.39 | 55.5                   | 63.8                   | 2.11 | 48.9                   | 59.4                   | 3.04  | 22.3                   | 27.1                   | 2.98  |
| 70-                     | 1200                   | 515                    | 16.0                   | 13.2                   | -2.94 | 55.8                   | 61.5                   | 1.52 | 51.2                   | 64.9                   | 3.71  | 22.8                   | 26.4                   | 2.32  |

<sup>a</sup> adjusted for sex according to the distribution in the first survey.

Table 3. Association of body size with hypertension and type 2 diabetes in two population-based surveys in Shanghai, China

|                      | No. of subjects with neither diseases | Type 2 diabetes only |                   | Hypertension only |                   | Both              |                  |
|----------------------|---------------------------------------|----------------------|-------------------|-------------------|-------------------|-------------------|------------------|
|                      |                                       | N                    | OR (95%CI)        | N                 | OR (95%CI)        | N                 | OR (95%CI)       |
| <b>BMI residuals</b> |                                       |                      |                   |                   |                   |                   |                  |
| Men                  |                                       |                      |                   |                   |                   |                   |                  |
| Q1                   | 1260                                  | 156                  | 1.00              | 529               | 1.00              | 175               | 1.00             |
| Q2                   | 1224                                  | 142                  | 0.99 (0.77, 1.27) | 583               | 1.16 (1.00, 1.34) | 172               | 1.11(0.87, 1.41) |
| Q3                   | 1164                                  | 132                  | 1.09 (0.84, 1.41) | 651               | 1.50 (1.29, 1.74) | 171               | 1.36(1.07, 1.73) |
| Q4                   | 1079                                  | 123                  | 1.16 (0.88, 1.51) | 709               | 1.85 (1.59, 2.15) | 207               | 1.95(1.54, 2.47) |
|                      | <i>P for trend</i>                    |                      | 0.2472            | <i>&lt;0.0001</i> |                   | <i>&lt;0.0001</i> |                  |
| Women                |                                       |                      |                   |                   |                   |                   |                  |
| Q1                   | 1816                                  | 166                  | 1.00              | 600               | 1.00              | 223               | 1.00             |
| Q2                   | 1866                                  | 148                  | 1.02 (0.80, 1.29) | 629               | 1.29 (1.12, 1.48) | 162               | 0.96(0.77, 1.21) |
| Q3                   | 1835                                  | 125                  | 0.89 (0.69, 1.15) | 687               | 1.51 (1.31, 1.73) | 158               | 1.03(0.82, 1.31) |
| Q4                   | 1634                                  | 109                  | 0.94 (0.73, 1.23) | 847               | 2.23 (1.94, 2.57) | 215               | 1.85(1.15, 2.98) |
|                      | <i>P for trend</i>                    |                      | 0.4864            | <i>&lt;0.0001</i> |                   | 0.0067            |                  |
| All subjects         |                                       |                      |                   |                   |                   |                   |                  |
| Q1                   | 3048                                  | 330                  | 1.00              | 1162              | 1.00              | 385               | 1.00             |
| Q2                   | 3079                                  | 282                  | 1.00 (0.84, 1.19) | 1200              | 1.22 (1.11, 1.35) | 363               | 1.03(0.87, 1.22) |
| Q3                   | 2998                                  | 278                  | 0.98 (0.82, 1.18) | 1346              | 1.50 (1.36, 1.67) | 302               | 1.18(1.00, 1.40) |
| Q4                   | 2753                                  | 211                  | 1.04 (0.86, 1.26) | 1527              | 2.05 (1.85, 2.27) | 433               | 1.88(1.60, 2.21) |
|                      | <i>P for trend</i>                    |                      | 0.2280            | <i>&lt;0.0001</i> |                   | <i>&lt;0.0001</i> |                  |
| <b>WC residuals</b>  |                                       |                      |                   |                   |                   |                   |                  |
| Men                  |                                       |                      |                   |                   |                   |                   |                  |
| Q1                   | 1376                                  | 102                  | 1.00              | 531               | 1.00              | 111               | 1.00             |
| Q2                   | 1232                                  | 131                  | 1.34 (1.02, 1.78) | 601               | 1.23 (1.06, 1.42) | 155               | 1.41(1.07, 1.84) |
| Q3                   | 1130                                  | 148                  | 1.39 (0.70, 2.77) | 644               | 1.39 (1.20, 1.62) | 197               | 1.73(1.33, 2.25) |
| Q4                   | 989                                   | 172                  | 1.75 (1.33, 2.30) | 696               | 1.57 (1.35, 1.82) | 262               | 2.25(1.74, 2.90) |
|                      | <i>P for trend</i>                    |                      | <i>&lt;0.0001</i> | <i>&lt;0.0001</i> |                   | <i>&lt;0.0001</i> |                  |
| Women                |                                       |                      |                   |                   |                   |                   |                  |
| Q1                   | 2019                                  | 80                   | 1.00              | 598               | 1.00              | 108               | 1.00             |
| Q2                   | 1935                                  | 102                  | 1.17 (0.86, 1.59) | 651               | 1.04 (0.91, 1.18) | 117               | 0.94(0.71, 1.25) |
| Q3                   | 1708                                  | 172                  | 2.04 (1.54, 2.70) | 732               | 1.14 (0.99, 1.30) | 194               | 1.40(1.08, 1.82) |
| Q4                   | 1489                                  | 194                  | 2.37 (1.78, 3.15) | 782               | 1.13 (0.98, 1.30) | 339               | 2.06(1.26, 3.38) |
|                      | <i>P for trend</i>                    |                      | <i>&lt;0.0001</i> | 0.0216            |                   | <i>&lt;0.0001</i> |                  |
| All subjects         |                                       |                      |                   |                   |                   |                   |                  |
| Q1                   | 3453                                  | 161                  | 1.00              | 1109              | 1.00              | 203               | 1.00             |
| Q2                   | 3192                                  | 260                  | 1.26 (0.99, 1.60) | 1211              | 1.12 (1.01, 1.23) | 260               | 1.16(0.82, 1.62) |
| Q3                   | 2838                                  | 301                  | 1.66 (1.16, 2.36) | 1373              | 1.25 (1.13, 1.38) | 412               | 1.55(1.29, 1.87) |
| Q4                   | 2395                                  | 379                  | 2.03 (1.66, 2.47) | 1542              | 1.34 (1.09, 1.64) | 608               | 2.18(1.83, 2.61) |
|                      | <i>P for trend</i>                    |                      | 0.0001            | 0.0021            |                   | <i>&lt;0.0001</i> |                  |

Missing value excluded from the analysis.

OR: Adjusted for age (continuous variable), education (no formal education, primary school, middle school, high school, colleague or above, dummy variables), per capita income (<1000, 1000-2999, 3000-5000 and >5000 RMB Yuan / month, dummy variables), resident site (urban/rural area), family history of type 2 diabetes (yes/no), smoking (ever/never), alcohol drinking (ever/never), regular exercise (never/ever), phase of study (first /second survey); Additionally adjusted for sex (male/female) for all subjects.



1  
2  
3  
4 Table 4. Joint effect of general obesity and central obesity on type 2 diabetes among Chinese adults

| BMI                      | WC: Lower       |                    |                | WC: Higher      |                    |                | OR (95%CI) for hypertension |                   | OR (95%CI) for type 2 diabetes |                   |
|--------------------------|-----------------|--------------------|----------------|-----------------|--------------------|----------------|-----------------------------|-------------------|--------------------------------|-------------------|
|                          | No. of subjects | Hypertension N (%) | Diabetes N (%) | No. of subjects | Hypertension N (%) | Diabetes N (%) | WC: Lower                   | WC: Higher        | WC: Lower                      | WC: Higher        |
| <b>Men</b>               |                 |                    |                |                 |                    |                |                             |                   |                                |                   |
| <18.5                    | 212             | 36                 | 20             | 16              | 10                 | 6              | 0.61(0.42, 0.89)            | 3.68(1.28, 10.59) | 1.02(0.62, 1.67)               | 3.77(1.13, 12.56) |
| 18.5-23.9                | 3034            | 767                | 296            | 679             | 249                | 111            | 1.00                        | 1.56(0.94, 2.57)  | 1.00                           | 1.48(1.15, 1.90)  |
| 24.0-27.9                | 1010            | 356                | 134            | 2530            | 1179               | 483            | 1.61(1.13, 2.32)            | 2.38(1.78, 3.17)  | 1.46(1.16, 1.83)               | 1.85(1.16, 2.96)  |
| ≥28.0                    | 36              | 20                 | 4              | 960             | 580                | 224            | 3.91(1.95, 7.82)            | 4.67(3.97, 5.49)  | 1.71(0.55, 5.37)               | 2.60(2.12, 3.18)  |
| <i>P for interaction</i> |                 |                    |                |                 |                    |                | <i>0.0711</i>               |                   | <i>0.0933</i>                  |                   |
| <b>Women</b>             |                 |                    |                |                 |                    |                |                             |                   |                                |                   |
| <18.5                    | 313             | 51                 | 19             | 8               | 2                  | 1              | 0.68(0.49, 0.94)            | 0.85(0.16, 4.51)  | 0.93(0.56, 1.54)               | 2.45(0.22, 26.72) |
| 18.5-23.9                | 4323            | 821                | 265            | 974             | 314                | 165            | 1.00                        | 1.48(1.26, 1.75)  | 1.00                           | 2.36(1.89, 2.94)  |
| 24.0-27.9                | 1330            | 384                | 93             | 2724            | 1102               | 437            | 1.84(1.59, 2.14)            | 2.21(1.97, 2.49)  | 1.19(0.92, 1.53)               | 2.14(1.81, 2.54)  |
| ≥28.0                    | 81              | 32                 | 9              | 1467            | 815                | 317            | 3.10(1.93, 5.00)            | 4.33(3.77, 4.96)  | 2.14(1.01, 4.52)               | 3.08(2.56, 3.71)  |
| <i>P for interaction</i> |                 |                    |                |                 |                    |                | <i>0.3524</i>               |                   | <i>0.4011</i>                  |                   |
| <b>Total</b>             |                 |                    |                |                 |                    |                |                             |                   |                                |                   |
| <18.5                    | 525             | 87                 | 39             | 24              | 12                 | 7              | 0.65(0.51, 0.83)            | 2.25(0.85, 5.93)  | 0.97(0.68, 1.39)               | 3.45(1.18, 10.12) |
| 18.5-23.9                | 7357            | 1588               | 561            | 1653            | 563                | 276            | 1.00                        | 1.52(1.25, 1.85)  | 1.00                           | 1.88(1.42, 2.49)  |
| 24.0-27.9                | 2340            | 740                | 227            | 5254            | 2281               | 920            | 1.74(1.50, 2.03)            | 2.31(2.03, 2.62)  | 1.33(1.12, 1.58)               | 1.99(1.62, 2.45)  |
| ≥28.0                    | 117             | 5                  | 13             | 2427            | 1395               | 541            | 3.34(2.26, 4.94)            | 4.46(4.02, 4.96)  | 2.00(1.07, 3.74)               | 2.85(2.49, 3.27)  |
| <i>P for interaction</i> |                 |                    |                |                 |                    |                | <i>0.0562</i>               |                   | <i>0.0798</i>                  |                   |

2 Higher WC defined as ≥ 85 cm for men and ≥ 80 cm for women

3 OR: Adjusted for age (continuous variable), education (no formal education, primary school, middle school, high school, colleague or above, dummy variables), per capita  
4 income (<1000, 1000-2999, 3000-5000 and >5000 RMB Yuan / month, dummy variables), resident site (urban/rural area), family history of type 2 diabetes (yes/no),  
5 smoking (ever/never), alcohol drinking (ever/never), regular exercise (never/ever), and phase of study (first /second survey).
